# Supplementary material for: Mechanism and optimization of ruthenium-catalyzed oxalamide synthesis using DFT
Source: Royal Society of Chemistry journal article supplement (doi:10.1039/d4dt03182b), 2024-12-06
Supplement: d4dt03182b1.pdf [file d4dt03182b1.pdf]

# Mechanism and Optimization of Ruthenium-Catalyzed Oxalamide Synthesis Using DFT

Roger Monreal-Corona, Nicolas Joly, Sylvain Gaillard, Jean-Luc Renaud,\* Marc Valero, Enric Mayolas, Anna Pla-Quintana\* and Albert Poater\*

## Electronic Supplementary Information

### Contents:

**Figure S1.** Reaction path for the formation of hydroxyacetaldehyde from ethylenglycol (relative Gibbs energies in kcal/mol).

**Figure S2.** Reaction path for the formation of hydroxyacetamide from hydroxyacetaldehyde (relative Gibbs energies in kcal/mol).

**Figure S3.** Reaction path leading to the oxalaldehyde **C1** from hydroxyacetaldehyde **B1** through **TS-B1C1** (relative Gibbs energies in kcal/mol).

**Figure S4.** Reaction path for the non-assisted (in black), water-assisted (in blue) and ethyleneglycol(EG)-assisted (in red) non-metal catalyzed coupling of hydroxyacetaldehyde (**II**) with amines to form aminoalcohol species **III**.

**Figure S5.** Reaction path for the formation of oxoacetamide from hydroxyacetamide (relative Gibbs energies in kcal/mol).

**Figure S6.** Reaction path for the formation of oxalamide from oxoacetamide (relative Gibbs energies in kcal/mol).

**Figure S7.** Ru-PNN catalyst derivatives tested experimentally that contain a labile C-H bond in the side arm of the pincer ligand, and the activation energy of the rds (relative Gibbs energies in kcal/mol).

**Table S1.** BP86-D3/Def2-SVP-SDD Cartesian coordinates of the optimized geometries of the species calculated in this study.

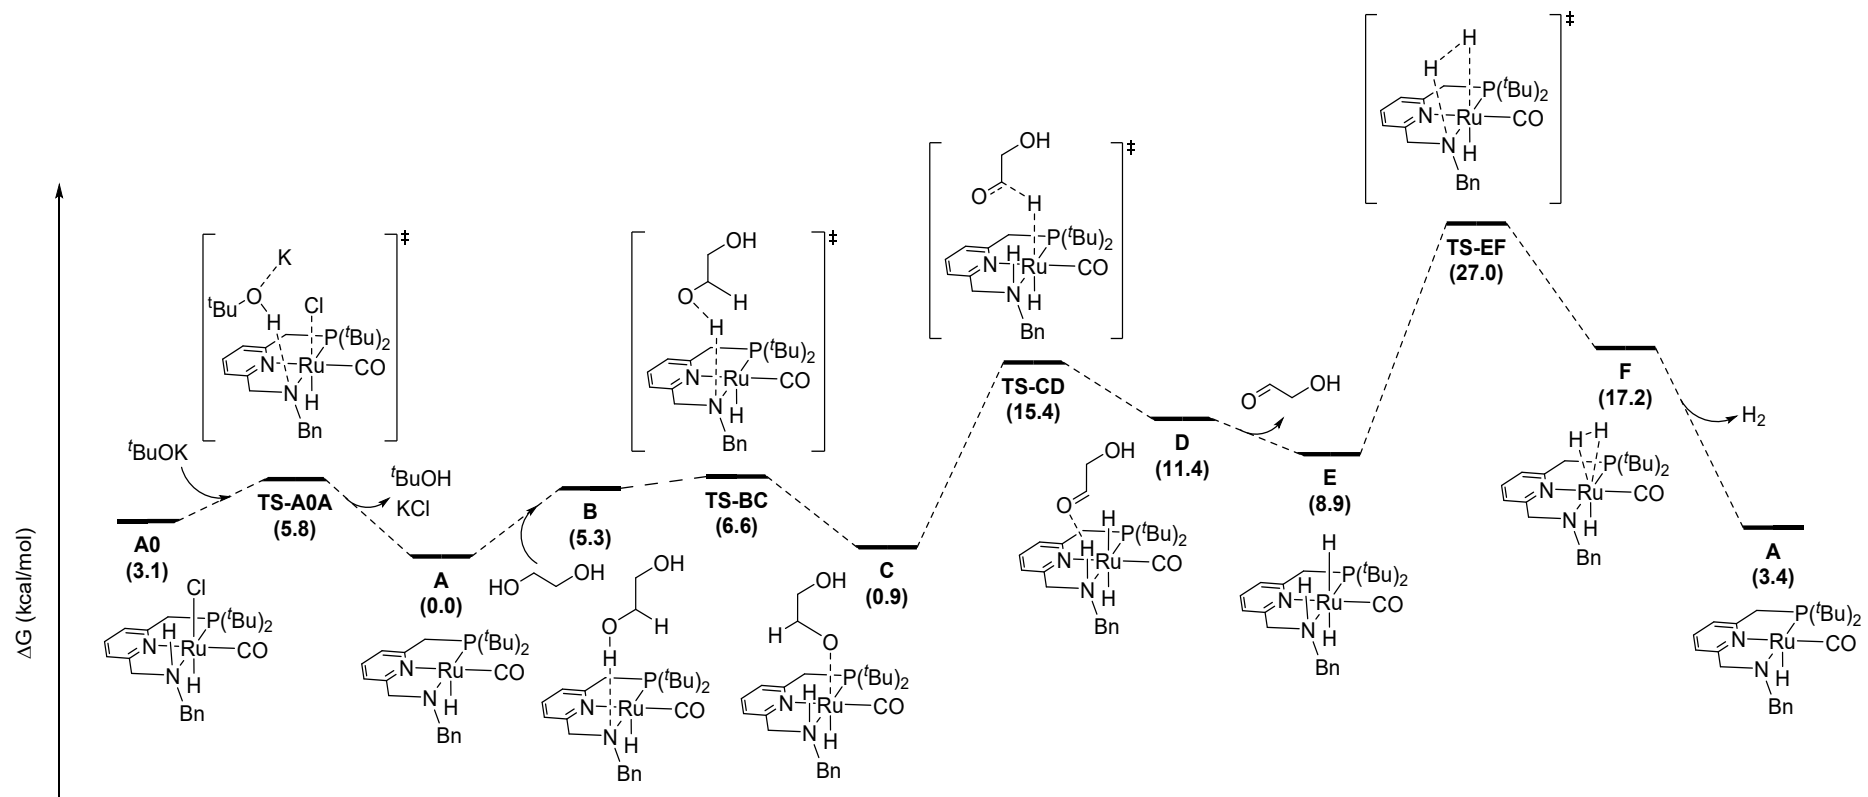

**Figure S1.** Reaction path for the formation of hydroxyacetaldehyde from ethyleneglycol (relative Gibbs energies in kcal/mol).

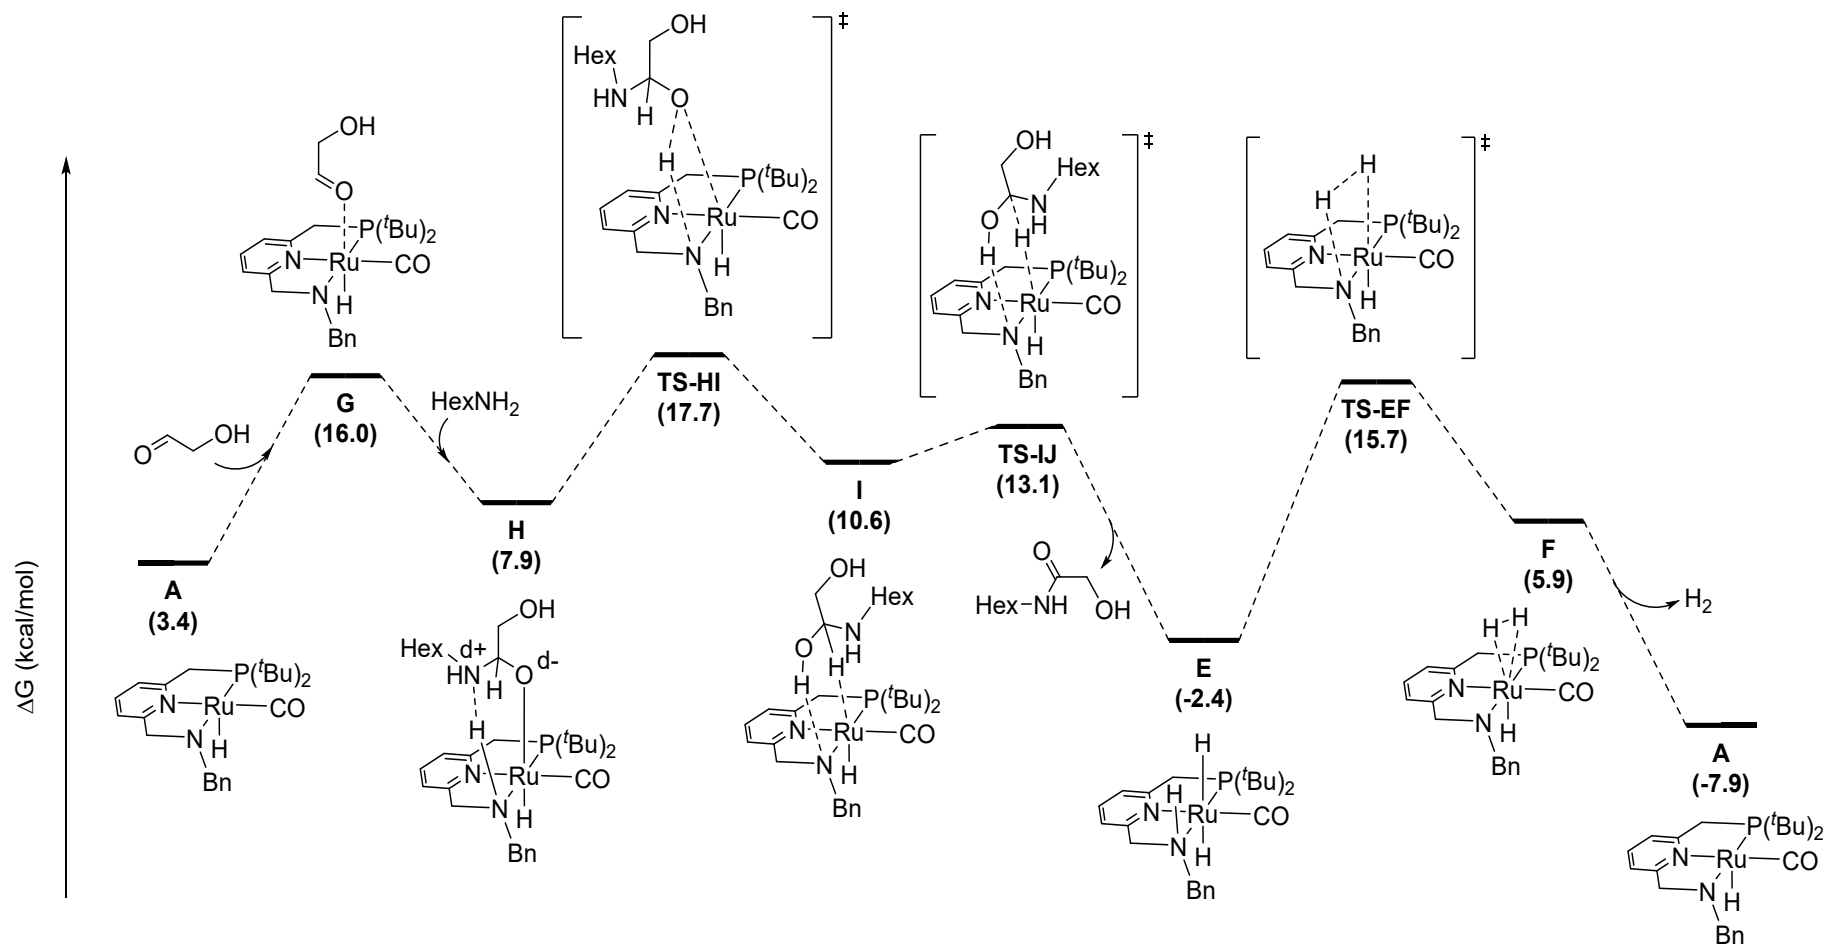

**Figure S2.** Reaction path for the formation of hydroxyacetamide from hydroxyacetaldehyde (relative Gibbs energies in kcal/mol).

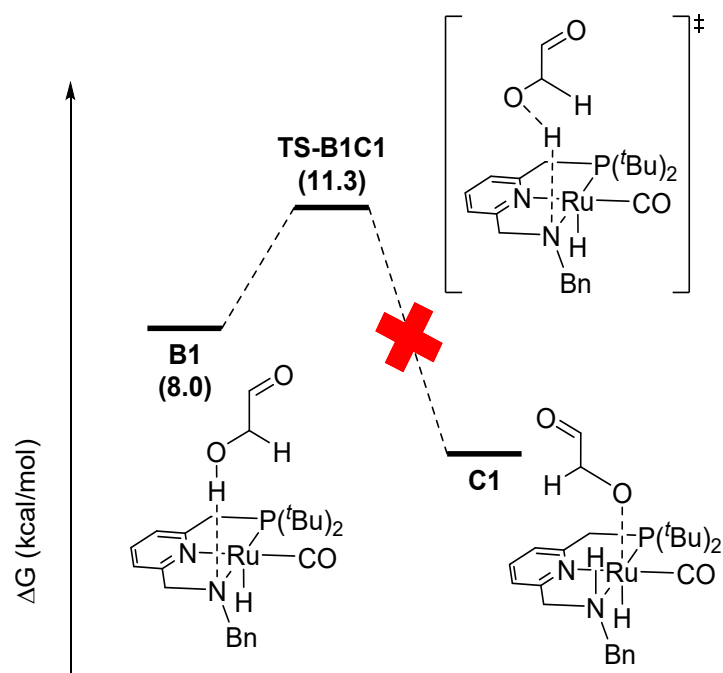

**Figure S3.** Reaction path leading to the oxalaldehyde **C1** from hydroxyacetaldehyde **B1** through **TS-B1C1** (relative Gibbs energies in kcal/mol).

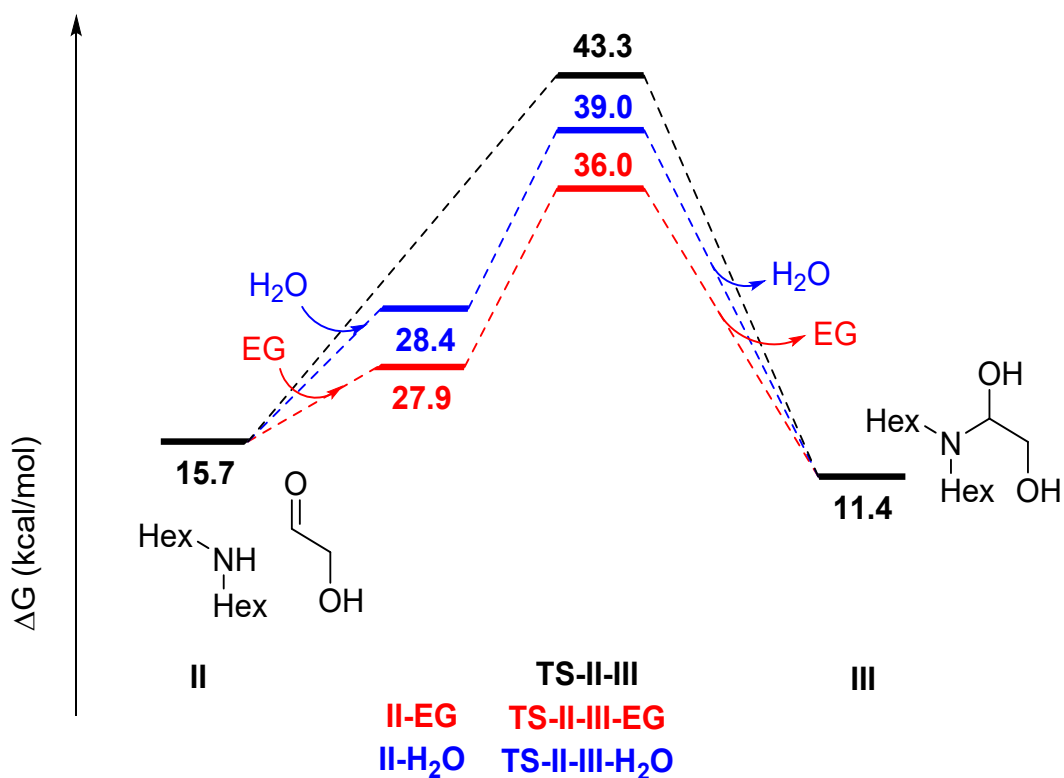

**Figure S4.** Reaction path for the non-assisted (in black), water-assisted (in blue) and ethyleneglycol(EG)-assisted (in red) non-metal catalyzed coupling of hydroxyacetaldehyde (**II**) with amines to form aminoalcohol species **III**.

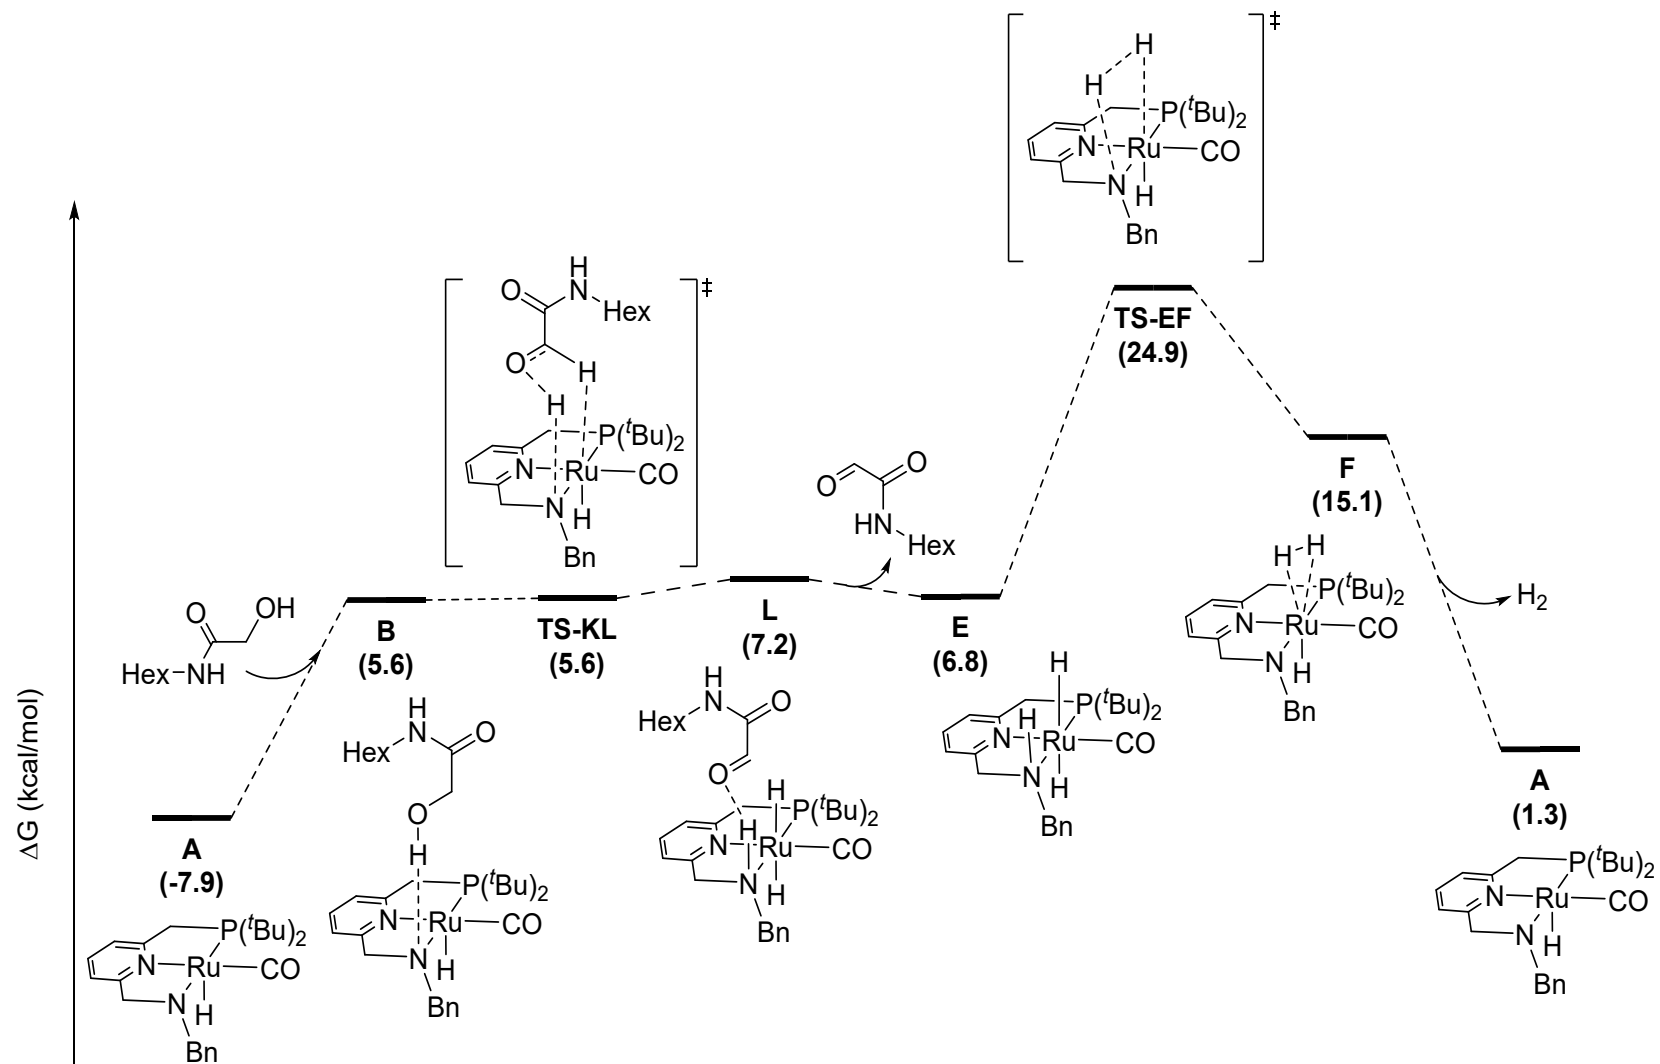

**Figure S5.** Reaction path for the formation of oxoacetamide from hydroxyacetamide (relative Gibbs energies in kcal/mol).

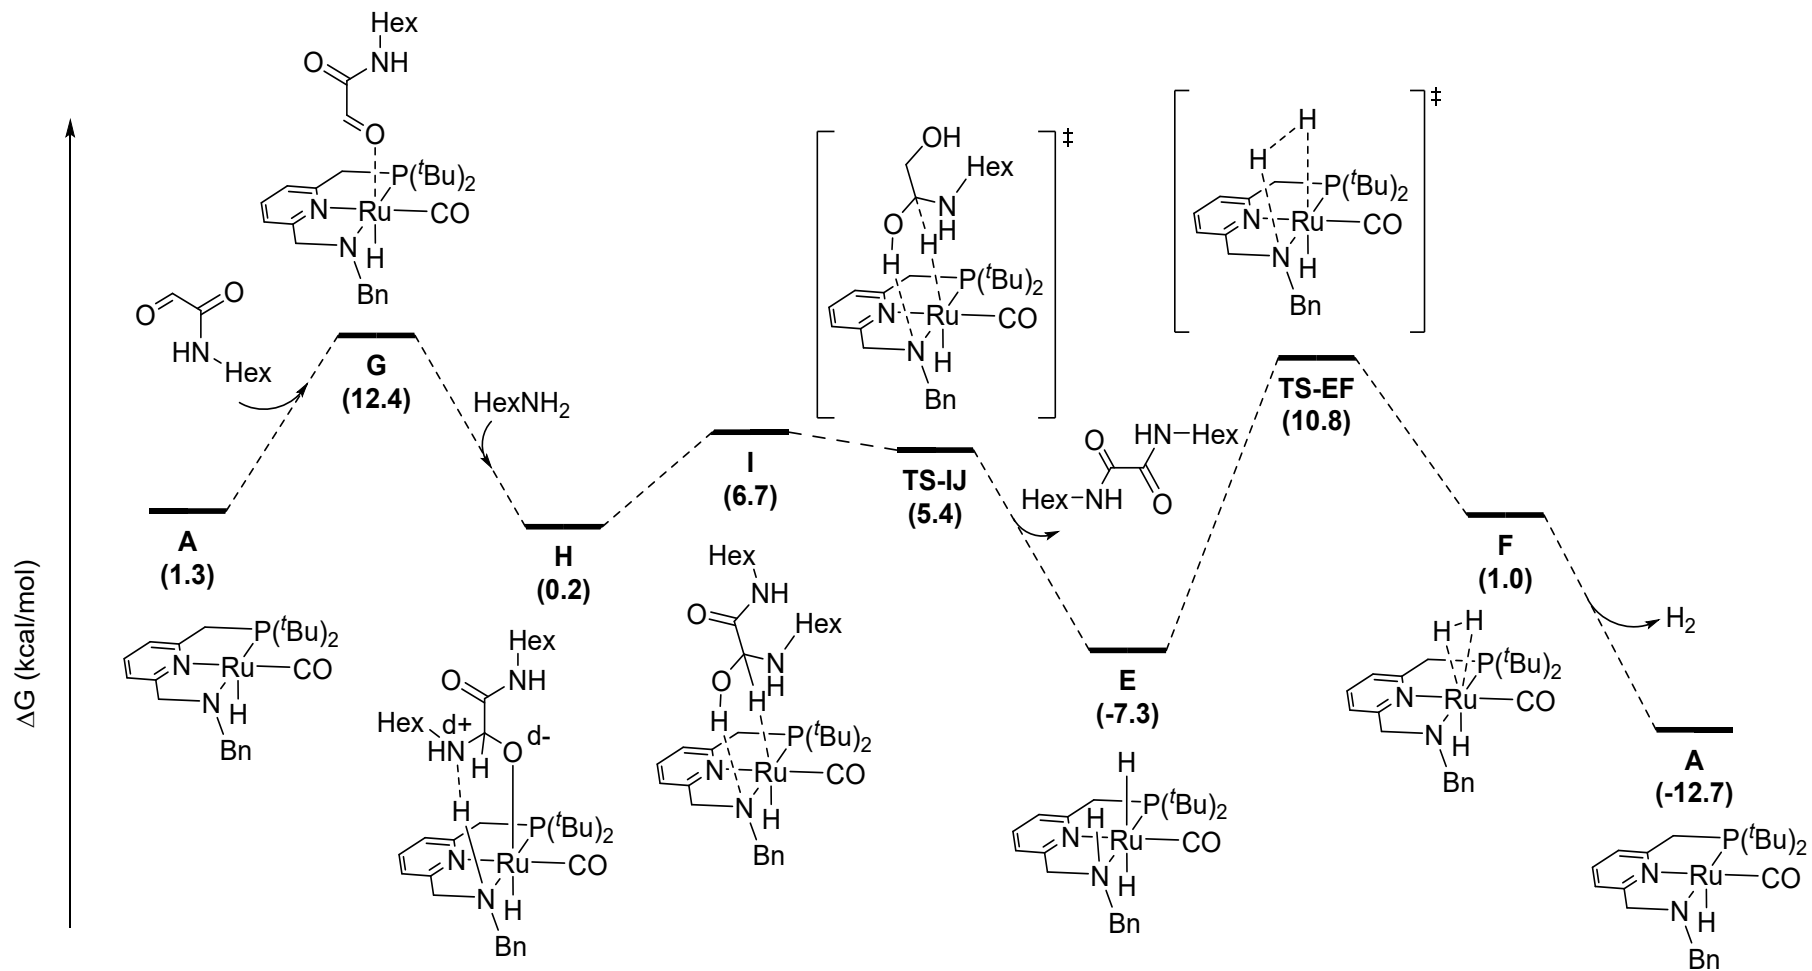

**Figure S6.** Reaction path for the formation of oxalamide from oxoacetamide (relative Gibbs energies in kcal/mol).

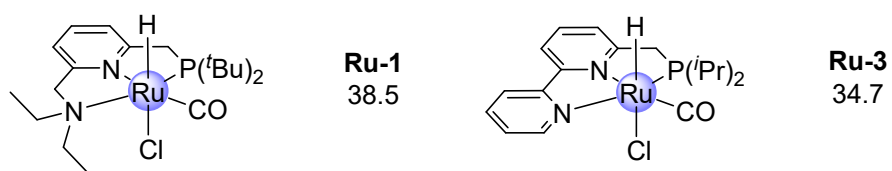

**Figure S7.** Ru-PNN catalyst derivatives tested experimentally that contain a labile C-H bond in the side arm of the pincer ligand, and the activation energy of the rds (relative Gibbs energies in kcal/mol).

**Table S1.** BP86-D3/Def2-SVP-SDD Cartesian coordinates and absolute energies (in a.u.) of the optimized geometries of the species calculated in this study.

63

A0 SCF Done: -1978.84134638 A.U.

Number of imaginary frequencies = 0

|    |           |           |           |
|----|-----------|-----------|-----------|
| C  | -0.916023 | -0.049544 | -0.763384 |
| H  | -1.186397 | 1.075984  | -2.613989 |
| N  | -1.602724 | 0.478637  | 3.157843  |
| C  | -0.470239 | -0.439255 | 2.891132  |
| C  | -0.416794 | -0.803935 | 1.424861  |
| N  | -0.901349 | 0.142034  | 0.583055  |
| C  | -1.589706 | 1.022052  | -1.582113 |
| P  | -1.599171 | 2.666470  | -0.657064 |
| H  | -2.504011 | -0.010798 | 2.953703  |
| H  | -0.511122 | -1.352815 | 3.525384  |
| H  | 0.464822  | 0.105719  | 3.155760  |
| H  | -2.668651 | 0.753612  | -1.644144 |
| C  | 0.121823  | -2.001671 | 0.932607  |
| H  | 0.503193  | -2.761193 | 1.631167  |
| C  | 0.162124  | -2.202046 | -0.457501 |
| H  | 0.587870  | -3.128586 | -0.872824 |
| C  | -0.363956 | -1.220182 | -1.312475 |
| H  | -0.368316 | -1.362501 | -2.403273 |
| Ru | -1.749984 | 1.860431  | 1.465692  |
| C  | -1.626873 | 1.015294  | 4.542000  |
| H  | -0.733801 | 1.661206  | 4.670200  |
| H  | -2.518649 | 1.670791  | 4.604069  |
| C  | -1.681484 | -0.073051 | 5.597660  |
| C  | -2.846364 | -0.861604 | 5.728638  |
| C  | -0.568530 | -0.363052 | 6.412787  |
| C  | -2.895567 | -1.915474 | 6.655143  |
| C  | -0.616058 | -1.415213 | 7.344995  |
| C  | -1.779472 | -2.194568 | 7.466363  |
| H  | -3.723175 | -0.642959 | 5.095383  |
| H  | 0.345937  | 0.245711  | 6.315255  |
| H  | -3.811602 | -2.520049 | 6.749531  |
| H  | 0.259970  | -1.627484 | 7.978506  |
| H  | -1.818842 | -3.019388 | 8.195490  |
| C  | 0.094694  | 3.471491  | -1.124450 |
| C  | -3.044123 | 3.632580  | -1.481348 |
| C  | -4.354343 | 3.105800  | -0.856726 |
| H  | -5.209828 | 3.638894  | -1.326849 |
| H  | -4.499339 | 2.018076  | -1.008488 |
| H  | -4.391285 | 3.273336  | 0.236234  |
| C  | -3.117371 | 3.434814  | -3.011208 |
| H  | -2.215278 | 3.783043  | -3.546383 |
| H  | -3.298093 | 2.375231  | -3.284388 |
| H  | -3.979043 | 4.017448  | -3.405067 |
| C  | -2.909025 | 5.130285  | -1.132473 |
| H  | -3.831122 | 5.660681  | -1.455597 |



|    |           |          |           |
|----|-----------|----------|-----------|
| H  | -2.802703 | 5.287706 | -0.039280 |
| H  | -2.055505 | 5.616205 | -1.645817 |
| C  | 0.192562  | 3.932537 | -2.591067 |
| H  | 1.227043  | 4.288382 | -2.792570 |
| H  | -0.013534 | 3.110076 | -3.307848 |
| H  | -0.489588 | 4.774573 | -2.819300 |
| C  | 0.352680  | 4.658860 | -0.170547 |
| H  | -0.358087 | 5.492931 | -0.323763 |
| H  | 0.281865  | 4.336019 | 0.887468  |
| H  | 1.376229  | 5.055807 | -0.347895 |
| C  | 1.184040  | 2.401962 | -0.874198 |
| H  | 2.184245  | 2.869068 | -1.006511 |
| H  | 1.127373  | 1.998831 | 0.156696  |
| H  | 1.121452  | 1.555924 | -1.589248 |
| Cl | -3.895356 | 0.486376 | 1.224223  |
| H  | -0.279599 | 2.411530 | 1.808530  |
| C  | -2.407132 | 3.405361 | 2.229870  |
| O  | -2.791712 | 4.414331 | 2.699415  |

15

tBuOK SCF Done: -833.157686603 A.U.

Number of imaginary frequencies = 0

|   |           |           |           |
|---|-----------|-----------|-----------|
| C | 0.696406  | -0.255236 | 0.116679  |
| C | 1.008036  | -1.775193 | 0.222641  |
| H | 0.792206  | -2.263725 | -0.752014 |
| H | 2.089177  | -1.914695 | 0.439145  |
| H | 0.420991  | -2.293887 | 1.013709  |
| C | 1.008038  | 0.413285  | 1.485842  |
| H | 2.089209  | 0.295698  | 1.714839  |
| H | 0.792017  | 1.501575  | 1.421412  |
| H | 0.421114  | -0.012394 | 2.330694  |
| C | -0.817757 | -0.077857 | -0.190608 |
| H | -1.052054 | 1.005496  | -0.272075 |
| H | -1.052122 | -0.549476 | -1.169297 |
| H | -1.482282 | -0.524261 | 0.583101  |
| O | 1.456592  | 0.319831  | -0.879619 |
| K | 2.692546  | 1.253529  | -2.497275 |

78

A0-ad SCF Done: -2812.03091528 A.U.

Number of imaginary frequencies = 0

|   |           |           |           |
|---|-----------|-----------|-----------|
| C | -2.616287 | 0.568057  | -0.441697 |
| H | -2.226366 | 1.400614  | -2.419014 |
| N | -2.703196 | 1.787995  | 3.375844  |
| C | -2.052292 | 0.461259  | 3.209099  |
| C | -2.399358 | -0.069669 | 1.843455  |
| N | -2.423095 | 0.881677  | 0.873532  |
| C | -2.554638 | 1.726120  | -1.410236 |
| P | -1.536750 | 3.139729  | -0.664943 |
| H | -3.729168 | 1.508349  | 3.446130  |
| H | -2.362647 | -0.251811 | 3.994965  |

|    |           |           |           |
|----|-----------|-----------|-----------|
| H  | -0.947539 | 0.604734  | 3.255562  |
| H  | -3.569181 | 2.176081  | -1.499174 |
| C  | -2.627746 | -1.418705 | 1.524125  |
| H  | -2.640818 | -2.168789 | 2.326660  |
| C  | -2.851455 | -1.768267 | 0.184020  |
| H  | -3.034585 | -2.818636 | -0.091471 |
| C  | -2.838297 | -0.767984 | -0.812544 |
| H  | -2.989338 | -1.022269 | -1.872560 |
| Ru | -2.175140 | 2.873683  | 1.508887  |
| C  | -2.283374 | 2.515714  | 4.605664  |
| H  | -1.196117 | 2.719981  | 4.514974  |
| H  | -2.801571 | 3.494260  | 4.576522  |
| C  | -2.588224 | 1.805464  | 5.909648  |
| C  | -3.825893 | 2.005416  | 6.555905  |
| C  | -1.659874 | 0.913549  | 6.488037  |
| C  | -4.134179 | 1.325723  | 7.745679  |
| C  | -1.965460 | 0.226677  | 7.675283  |
| C  | -3.205600 | 0.430712  | 8.306157  |
| H  | -4.557579 | 2.698509  | 6.109887  |
| H  | -0.684084 | 0.757989  | 5.998799  |
| H  | -5.108408 | 1.488092  | 8.233041  |
| H  | -1.232162 | -0.470307 | 8.111344  |
| H  | -3.448284 | -0.107985 | 9.235772  |
| C  | 0.299680  | 2.644889  | -1.037355 |
| C  | -2.020760 | 4.660848  | -1.744952 |
| C  | -3.368382 | 5.192871  | -1.214297 |
| H  | -3.661384 | 6.079880  | -1.818123 |
| H  | -4.181813 | 4.444728  | -1.279513 |
| H  | -3.306947 | 5.494315  | -0.151632 |
| C  | -2.188886 | 4.319639  | -3.241699 |
| H  | -1.271407 | 3.923307  | -3.713246 |
| H  | -3.009237 | 3.592221  | -3.409747 |
| H  | -2.466777 | 5.246691  | -3.790092 |
| C  | -0.963106 | 5.768793  | -1.552530 |
| H  | -1.329883 | 6.703788  | -2.029241 |
| H  | -0.795224 | 5.988986  | -0.477876 |
| H  | 0.010201  | 5.523111  | -2.021014 |
| C  | 0.681979  | 2.717805  | -2.528496 |
| H  | 1.714551  | 2.325055  | -2.658331 |
| H  | 0.016439  | 2.097885  | -3.165268 |
| H  | 0.679041  | 3.752752  | -2.922310 |
| C  | 1.231848  | 3.549013  | -0.199808 |
| H  | 1.207922  | 4.607054  | -0.521182 |
| H  | 0.958355  | 3.508640  | 0.873711  |
| H  | 2.279632  | 3.192100  | -0.306723 |
| C  | 0.496348  | 1.185364  | -0.562758 |
| H  | 1.570891  | 0.919123  | -0.664780 |
| H  | 0.212813  | 1.059546  | 0.500519  |
| H  | -0.079393 | 0.457684  | -1.170590 |
| Cl | -4.689365 | 3.216447  | 1.080839  |
| H  | -0.661386 | 2.544390  | 1.911095  |

|   |           |           |          |
|---|-----------|-----------|----------|
| C | -1.836563 | 4.602161  | 2.064218 |
| O | -1.573252 | 5.699848  | 2.396991 |
| C | -5.445526 | -0.822692 | 4.192260 |
| C | -6.137145 | -1.997906 | 3.431693 |
| H | -5.401784 | -2.486568 | 2.755916 |
| H | -6.558197 | -2.774361 | 4.107799 |
| H | -6.985345 | -1.622573 | 2.811435 |
| C | -4.377071 | -1.447850 | 5.132098 |
| H | -4.814607 | -2.146534 | 5.877830 |
| H | -3.631134 | -2.016912 | 4.535697 |
| H | -3.843980 | -0.650702 | 5.684698 |
| C | -6.514665 | -0.111758 | 5.068029 |
| H | -6.991958 | -0.784620 | 5.815069 |
| H | -6.040627 | 0.731436  | 5.607366 |
| H | -7.315313 | 0.310564  | 4.421231 |
| O | -4.886247 | 0.074517  | 3.292261 |
| K | -5.958798 | 0.620487  | 1.160507 |

78

TS-A0A SCF Done: -2812.02211727 A.U.

Number of imaginary frequencies = 1

Imaginary frequency = -513.69 cm<sup>-1</sup>

|    |           |           |           |
|----|-----------|-----------|-----------|
| C  | -1.665562 | 0.060395  | -0.640232 |
| H  | -1.652221 | 1.220024  | -2.484851 |
| N  | -2.040522 | 0.719387  | 3.365993  |
| C  | -1.112100 | -0.370697 | 2.998105  |
| C  | -1.239101 | -0.767903 | 1.550825  |
| N  | -1.590631 | 0.242253  | 0.710552  |
| C  | -2.063291 | 1.264935  | -1.455094 |
| P  | -1.680920 | 2.852005  | -0.498011 |
| H  | -3.085171 | 0.041742  | 3.586701  |
| H  | -1.273598 | -1.268272 | 3.636527  |
| H  | -0.051774 | -0.037104 | 3.135895  |
| H  | -3.175505 | 1.281802  | -1.514672 |
| C  | -0.974436 | -2.055969 | 1.048194  |
| H  | -0.704229 | -2.865334 | 1.743066  |
| C  | -1.051847 | -2.273688 | -0.339951 |
| H  | -0.839707 | -3.269985 | -0.759130 |
| C  | -1.395066 | -1.206503 | -1.191348 |
| H  | -1.455441 | -1.348155 | -2.280751 |
| Ru | -2.093148 | 2.060787  | 1.611952  |
| C  | -1.576369 | 1.447523  | 4.577308  |
| H  | -0.538998 | 1.817835  | 4.394157  |
| H  | -2.207169 | 2.352169  | 4.664664  |
| C  | -1.614216 | 0.727564  | 5.922120  |
| C  | -2.397324 | 1.266891  | 6.967545  |
| C  | -0.846999 | -0.425050 | 6.208548  |
| C  | -2.448659 | 0.664061  | 8.235354  |
| C  | -0.906334 | -1.043381 | 7.468732  |
| C  | -1.713557 | -0.506214 | 8.487038  |
| H  | -2.984747 | 2.180258  | 6.779744  |

|    |           |           |           |
|----|-----------|-----------|-----------|
| H  | -0.176087 | -0.844971 | 5.445397  |
| H  | -3.075697 | 1.106018  | 9.025981  |
| H  | -0.307949 | -1.948740 | 7.660277  |
| H  | -1.760481 | -0.992614 | 9.474275  |
| C  | 0.193251  | 3.173871  | -0.879514 |
| C  | -2.749144 | 4.187655  | -1.391144 |
| C  | -4.182225 | 4.084084  | -0.828301 |
| H  | -4.810266 | 4.862988  | -1.314393 |
| H  | -4.645873 | 3.096539  | -1.014526 |
| H  | -4.211071 | 4.242291  | 0.266466  |
| C  | -2.813776 | 3.998369  | -2.922140 |
| H  | -1.827923 | 4.052778  | -3.418724 |
| H  | -3.290902 | 3.035871  | -3.198412 |
| H  | -3.445897 | 4.804366  | -3.356226 |
| C  | -2.200689 | 5.586336  | -1.035622 |
| H  | -2.915692 | 6.356365  | -1.398770 |
| H  | -2.102840 | 5.717591  | 0.061994  |
| H  | -1.221727 | 5.801331  | -1.507442 |
| C  | 0.480407  | 3.582983  | -2.337047 |
| H  | 1.580666  | 3.652257  | -2.486060 |
| H  | 0.100192  | 2.837510  | -3.066808 |
| H  | 0.056937  | 4.572721  | -2.595769 |
| C  | 0.716389  | 4.253533  | 0.094480  |
| H  | 0.272161  | 5.249641  | -0.089009 |
| H  | 0.505469  | 3.970497  | 1.145397  |
| H  | 1.817498  | 4.352920  | -0.025907 |
| C  | 0.958367  | 1.860284  | -0.591091 |
| H  | 2.048746  | 2.051527  | -0.694038 |
| H  | 0.771512  | 1.496457  | 0.438530  |
| H  | 0.701349  | 1.051715  | -1.306065 |
| Cl | -4.539323 | 1.354305  | 1.004335  |
| H  | -0.568617 | 2.325764  | 2.006911  |
| C  | -2.488438 | 3.692306  | 2.385782  |
| O  | -2.713044 | 4.747495  | 2.855668  |
| C  | -4.999456 | -0.703612 | 4.574063  |
| C  | -6.289842 | -1.346153 | 3.995556  |
| H  | -6.124069 | -2.427581 | 3.783245  |
| H  | -7.142275 | -1.280289 | 4.704540  |
| H  | -6.608482 | -0.823045 | 3.065314  |
| C  | -4.676662 | -1.382426 | 5.924784  |
| H  | -5.481754 | -1.239801 | 6.678463  |
| H  | -4.529105 | -2.472233 | 5.767498  |
| H  | -3.735450 | -0.972670 | 6.336679  |
| C  | -5.259916 | 0.809939  | 4.756633  |
| H  | -6.136258 | 1.008316  | 5.410081  |
| H  | -4.379436 | 1.295850  | 5.217096  |
| H  | -5.423838 | 1.280687  | 3.765023  |
| O  | -3.927015 | -0.911130 | 3.677491  |
| K  | -4.493312 | -1.535665 | 1.332880  |

A-ad SCF Done: -2812.02643182 A.U.

Number of imaginary frequencies = 0

|    |           |           |           |
|----|-----------|-----------|-----------|
| C  | -1.287080 | -0.019090 | -0.533704 |
| H  | -1.263510 | 1.152214  | -2.370422 |
| N  | -2.083207 | 0.563251  | 3.431933  |
| C  | -0.989810 | -0.379519 | 3.135983  |
| C  | -0.940129 | -0.794726 | 1.690177  |
| N  | -1.354122 | 0.162635  | 0.816241  |
| C  | -1.784316 | 1.117392  | -1.390935 |
| P  | -1.770641 | 2.732865  | -0.406669 |
| H  | -3.398017 | -0.159924 | 3.713478  |
| H  | -1.000831 | -1.282525 | 3.793629  |
| H  | 0.007079  | 0.104888  | 3.329884  |
| H  | -2.870045 | 0.947495  | -1.571497 |
| C  | -0.461052 | -2.032505 | 1.218282  |
| H  | -0.131295 | -2.798740 | 1.936826  |
| C  | -0.387793 | -2.248725 | -0.170648 |
| H  | -0.004985 | -3.203276 | -0.565241 |
| C  | -0.797310 | -1.232637 | -1.052806 |
| H  | -0.745736 | -1.374409 | -2.142562 |
| Ru | -2.220551 | 1.864735  | 1.671717  |
| C  | -1.739240 | 1.310775  | 4.660051  |
| H  | -0.899303 | 2.021216  | 4.464339  |
| H  | -2.612448 | 1.951559  | 4.910157  |
| C  | -1.366397 | 0.480085  | 5.886387  |
| C  | -0.322813 | 0.919287  | 6.730051  |
| C  | -2.039968 | -0.715606 | 6.225293  |
| C  | 0.029888  | 0.203024  | 7.887295  |
| C  | -1.683224 | -1.438474 | 7.376893  |
| C  | -0.650278 | -0.982716 | 8.215950  |
| H  | 0.222332  | 1.843365  | 6.472483  |
| H  | -2.851665 | -1.073894 | 5.571975  |
| H  | 0.845161  | 0.570022  | 8.531925  |
| H  | -2.223928 | -2.367165 | 7.623757  |
| H  | -0.374397 | -1.549807 | 9.119651  |
| C  | 0.048959  | 3.371177  | -0.620297 |
| C  | -2.965059 | 3.879429  | -1.398170 |
| C  | -4.402885 | 3.525103  | -0.963490 |
| H  | -5.110593 | 4.201426  | -1.491928 |
| H  | -4.675973 | 2.479836  | -1.203829 |
| H  | -4.548073 | 3.645844  | 0.127097  |
| C  | -2.862171 | 3.704102  | -2.928467 |
| H  | -1.861484 | 3.938261  | -3.335195 |
| H  | -3.134999 | 2.676508  | -3.244651 |
| H  | -3.586107 | 4.392422  | -3.418402 |
| C  | -2.695852 | 5.345547  | -0.996564 |
| H  | -3.495208 | 5.989573  | -1.423724 |
| H  | -2.719011 | 5.476191  | 0.105370  |
| H  | -1.728983 | 5.728299  | -1.378533 |
| C  | 0.390685  | 3.840655  | -2.047505 |
| H  | 1.472129  | 4.096760  | -2.098518 |

|    |           |           |           |
|----|-----------|-----------|-----------|
| H  | 0.207700  | 3.051073  | -2.806412 |
| H  | -0.170536 | 4.747597  | -2.345146 |
| C  | 0.295500  | 4.511833  | 0.392626  |
| H  | -0.294231 | 5.420350  | 0.168700  |
| H  | 0.045592  | 4.184545  | 1.421966  |
| H  | 1.369994  | 4.797903  | 0.368388  |
| C  | 0.994935  | 2.200836  | -0.259879 |
| H  | 2.042924  | 2.572098  | -0.267295 |
| H  | 0.782343  | 1.799341  | 0.750660  |
| H  | 0.940211  | 1.367885  | -0.990911 |
| Cl | -4.428716 | 0.690304  | 0.752258  |
| H  | -0.811518 | 2.395741  | 2.182901  |
| C  | -2.957078 | 3.383170  | 2.425135  |
| O  | -3.401633 | 4.371498  | 2.885012  |
| C  | -5.437360 | -0.214638 | 4.378110  |
| C  | -6.605631 | -0.716250 | 3.500761  |
| H  | -6.668079 | -1.827644 | 3.536101  |
| H  | -7.581337 | -0.321666 | 3.853949  |
| H  | -6.459605 | -0.377037 | 2.452982  |
| C  | -5.664683 | -0.637072 | 5.843581  |
| H  | -6.624740 | -0.241050 | 6.237346  |
| H  | -5.682644 | -1.744652 | 5.924046  |
| H  | -4.844204 | -0.260878 | 6.487743  |
| C  | -5.343714 | 1.317713  | 4.268190  |
| H  | -6.297235 | 1.793240  | 4.577936  |
| H  | -4.543860 | 1.708972  | 4.927956  |
| H  | -5.115932 | 1.614913  | 3.225590  |
| O  | -4.231028 | -0.840656 | 3.903274  |
| K  | -3.989080 | -2.015498 | 1.664050  |

17

tBuOH-KCl SCF Done: -1294.07238215 A.U.

Number of imaginary frequencies = 0

|    |           |           |           |
|----|-----------|-----------|-----------|
| C  | -0.388128 | 0.288768  | -0.098320 |
| C  | -1.844888 | 0.338451  | -0.583090 |
| H  | -2.516303 | -0.156941 | 0.148768  |
| H  | -2.188424 | 1.391262  | -0.691000 |
| H  | -1.936718 | -0.189235 | -1.558073 |
| C  | -0.203795 | 0.998104  | 1.252746  |
| H  | -0.799040 | 0.500806  | 2.045770  |
| H  | 0.863512  | 0.988912  | 1.555804  |
| H  | -0.542789 | 2.056259  | 1.197778  |
| C  | 0.115260  | -1.158514 | -0.043779 |
| H  | -0.101482 | -1.679360 | -1.004188 |
| H  | 1.202873  | -1.184520 | 0.182236  |
| H  | -0.411991 | -1.710303 | 0.760250  |
| O  | 0.464543  | 0.975846  | -1.082343 |
| H  | 0.162067  | 1.905274  | -1.093293 |
| K  | 1.202526  | -0.254885 | -3.367080 |
| Cl | -1.030076 | -1.845336 | -3.478620 |

61

A SCF Done: -1517.92483419 A.U.

Number of imaginary frequencies = 0

|    |           |           |           |
|----|-----------|-----------|-----------|
| C  | -0.565358 | -0.126532 | -0.728805 |
| H  | -0.985202 | 1.115906  | -2.476339 |
| N  | -0.340804 | 0.601145  | 3.173855  |
| C  | 0.167216  | -0.715014 | 2.848644  |
| C  | 0.119868  | -0.992018 | 1.370960  |
| N  | -0.350165 | 0.037406  | 0.612296  |
| C  | -1.316075 | 0.981988  | -1.426491 |
| H  | -0.405916 | -1.526828 | 3.369288  |
| H  | 1.227149  | -0.844725 | 3.200511  |
| H  | -2.381399 | 0.666410  | -1.478479 |
| C  | 0.494211  | -2.211460 | 0.781375  |
| H  | 0.884144  | -3.022952 | 1.414304  |
| C  | 0.359757  | -2.368326 | -0.604757 |
| H  | 0.658178  | -3.309253 | -1.092266 |
| C  | -0.194507 | -1.318600 | -1.364567 |
| H  | -0.360595 | -1.430060 | -2.446523 |
| Ru | -0.634815 | 1.856576  | 1.638886  |
| C  | -0.376713 | 0.845460  | 4.608705  |
| H  | 0.597198  | 0.581344  | 5.096207  |
| H  | -0.528640 | 1.931625  | 4.773339  |
| C  | -1.499183 | 0.071909  | 5.298681  |
| C  | -2.824687 | 0.211413  | 4.832190  |
| C  | -1.249678 | -0.798456 | 6.377422  |
| C  | -3.875724 | -0.492870 | 5.439243  |
| C  | -2.300351 | -1.509828 | 6.988055  |
| C  | -3.616417 | -1.357953 | 6.520705  |
| H  | -3.013233 | 0.875778  | 3.972152  |
| H  | -0.216124 | -0.920448 | 6.744158  |
| H  | -4.906309 | -0.368193 | 5.068908  |
| H  | -2.087440 | -2.188811 | 7.829669  |
| H  | -4.440725 | -1.914075 | 6.995441  |
| C  | -0.043003 | 3.681483  | -1.436282 |
| C  | -3.088147 | 3.242298  | -0.651535 |
| C  | -3.946345 | 2.386397  | 0.309702  |
| H  | -5.007646 | 2.712885  | 0.244607  |
| H  | -3.914878 | 1.304889  | 0.057583  |
| H  | -3.607171 | 2.492920  | 1.359987  |
| C  | -3.665268 | 3.114925  | -2.076843 |
| H  | -3.134983 | 3.741878  | -2.816242 |
| H  | -3.660319 | 2.068556  | -2.446558 |
| H  | -4.727548 | 3.445268  | -2.068848 |
| C  | -3.140253 | 4.711863  | -0.184883 |
| H  | -4.200319 | 5.040532  | -0.114449 |
| H  | -2.681593 | 4.843873  | 0.816363  |
| H  | -2.633361 | 5.394898  | -0.895961 |
| C  | -0.554403 | 4.146657  | -2.811561 |
| H  | 0.269116  | 4.657702  | -3.357885 |
| H  | -0.892210 | 3.301724  | -3.448071 |

|   |           |          |           |
|---|-----------|----------|-----------|
| H | -1.386465 | 4.873442 | -2.726550 |
| C | 0.331794  | 4.901358 | -0.566705 |
| H | -0.530897 | 5.567847 | -0.373964 |
| H | 0.739491  | 4.584058 | 0.413671  |
| H | 1.109544  | 5.501504 | -1.087773 |
| C | 1.222306  | 2.814145 | -1.637121 |
| H | 1.573089  | 2.377859 | -0.678976 |
| H | 1.063059  | 1.986342 | -2.358522 |
| H | 2.039623  | 3.449117 | -2.042934 |
| H | 0.765253  | 2.446704 | 1.228543  |
| C | -0.971176 | 3.445848 | 2.514244  |
| O | -1.194988 | 4.484208 | 3.028424  |
| P | -1.284587 | 2.590050 | -0.436615 |

10

ethyleneglycol SCF Done: -230.359711835 A.U.

Number of imaginary frequencies = 0

|   |           |           |           |
|---|-----------|-----------|-----------|
| C | -1.699129 | 0.348093  | 0.000009  |
| H | -1.280114 | 0.867328  | 0.898983  |
| H | -1.280090 | 0.867324  | -0.898957 |
| C | -1.191591 | -1.089528 | 0.000017  |
| H | -1.610615 | -1.608757 | 0.898990  |
| H | -1.610619 | -1.608767 | -0.898950 |
| O | 0.227830  | -1.041366 | 0.000012  |
| H | 0.554677  | -1.958530 | 0.000109  |
| O | -3.118549 | 0.299930  | -0.000011 |
| H | -3.445396 | 1.217094  | -0.000009 |

71

B SCF Done: -1748.31429827 A.U.

Number of imaginary frequencies = 0

|    |           |           |           |
|----|-----------|-----------|-----------|
| C  | -1.800961 | -0.268933 | -0.780816 |
| H  | -1.751210 | 1.265548  | -2.330435 |
| N  | -2.344754 | -0.404094 | 3.197924  |
| C  | -1.485082 | -1.490944 | 2.701143  |
| C  | -1.503561 | -1.552847 | 1.194783  |
| N  | -1.806465 | -0.378702 | 0.579525  |
| C  | -2.214497 | 1.070453  | -1.341558 |
| H  | -1.769776 | -2.484883 | 3.122682  |
| H  | -0.415567 | -1.326396 | 3.006822  |
| H  | -3.315914 | 1.054277  | -1.500528 |
| C  | -1.181645 | -2.693395 | 0.439956  |
| H  | -0.956344 | -3.638601 | 0.955052  |
| C  | -1.154217 | -2.598627 | -0.957735 |
| H  | -0.898527 | -3.477662 | -1.569707 |
| C  | -1.462986 | -1.372955 | -1.576851 |
| H  | -1.455179 | -1.272806 | -2.672332 |
| Ru | -2.113362 | 1.288477  | 1.881644  |
| C  | -2.170185 | -0.232054 | 4.647866  |
| H  | -1.118302 | 0.061666  | 4.894827  |
| H  | -2.806049 | 0.624016  | 4.964079  |



|   |           |           |           |
|---|-----------|-----------|-----------|
| C | -2.545192 | -1.456138 | 5.477817  |
| C | -3.758107 | -2.143966 | 5.249170  |
| C | -1.691162 | -1.922865 | 6.498357  |
| C | -4.105673 | -3.261881 | 6.025169  |
| C | -2.039461 | -3.037034 | 7.282878  |
| C | -3.250156 | -3.711138 | 7.048211  |
| H | -4.426829 | -1.820634 | 4.435610  |
| H | -0.735824 | -1.401708 | 6.679514  |
| H | -5.053421 | -3.788281 | 5.827405  |
| H | -1.358068 | -3.383578 | 8.076751  |
| H | -3.524645 | -4.587720 | 7.656767  |
| C | -0.145918 | 3.075972  | -0.526455 |
| C | -3.248012 | 3.750505  | -0.567415 |
| C | -4.579890 | 3.190035  | -0.018290 |
| H | -5.396340 | 3.914141  | -0.231224 |
| H | -4.858883 | 2.231022  | -0.504570 |
| H | -4.537412 | 3.009705  | 1.073804  |
| C | -3.399507 | 3.992106  | -2.083818 |
| H | -2.504649 | 4.449309  | -2.543386 |
| H | -3.635124 | 3.060585  | -2.638666 |
| H | -4.248347 | 4.690530  | -2.254578 |
| C | -2.928929 | 5.072040  | 0.162132  |
| H | -3.784480 | 5.772783  | 0.047240  |
| H | -2.768985 | 4.913945  | 1.248523  |
| H | -2.034240 | 5.576459  | -0.255188 |
| C | -0.058522 | 3.854865  | -1.851457 |
| H | 1.008321  | 4.072020  | -2.079478 |
| H | -0.464963 | 3.279466  | -2.709471 |
| H | -0.584683 | 4.828699  | -1.802899 |
| C | 0.359835  | 3.951201  | 0.641758  |
| H | -0.246983 | 4.866348  | 0.783335  |
| H | 0.350644  | 3.387787  | 1.595713  |
| H | 1.404937  | 4.270166  | 0.436127  |
| C | 0.751198  | 1.819123  | -0.623621 |
| H | 0.663693  | 1.184106  | 0.281277  |
| H | 0.517924  | 1.196087  | -1.511416 |
| H | 1.812175  | 2.137907  | -0.716212 |
| H | -0.547113 | 1.320217  | 2.048190  |
| C | -2.169874 | 2.751942  | 3.003275  |
| O | -2.157937 | 3.705881  | 3.693899  |
| P | -1.914712 | 2.451934  | -0.083612 |
| O | -4.650215 | 0.954975  | 2.426226  |
| C | -5.649884 | 0.197516  | 1.735682  |
| C | -5.051760 | -1.019957 | 1.035447  |
| H | -5.857556 | -1.582260 | 0.512892  |
| H | -4.341065 | -0.656031 | 0.248527  |
| O | -4.421429 | -1.901735 | 1.943142  |
| H | -3.743319 | -1.367774 | 2.461323  |
| H | -4.085821 | 0.313688  | 2.947642  |
| H | -6.435144 | -0.134905 | 2.456648  |
| H | -6.129421 | 0.878659  | 1.000284  |

71

TS-BC SCF Done: -1748.30960410 A.U.

Number of imaginary frequencies = 1

Imaginary frequency = -671.10 cm<sup>-1</sup>

|    |           |           |           |
|----|-----------|-----------|-----------|
| C  | -1.664615 | -0.249776 | -0.662843 |
| H  | -1.737038 | 1.236092  | -2.260971 |
| N  | -1.876050 | -0.237162 | 3.350462  |
| C  | -1.157747 | -1.400812 | 2.830075  |
| C  | -1.250971 | -1.474701 | 1.327483  |
| N  | -1.539145 | -0.306920 | 0.695020  |
| C  | -2.142478 | 1.060461  | -1.243410 |
| H  | -1.542954 | -2.356229 | 3.255266  |
| H  | -0.070506 | -1.341655 | 3.101412  |
| H  | -3.247788 | 0.994313  | -1.349358 |
| C  | -1.044521 | -2.654021 | 0.591895  |
| H  | -0.837866 | -3.593791 | 1.123746  |
| C  | -1.122866 | -2.608203 | -0.805580 |
| H  | -0.958322 | -3.518978 | -1.402285 |
| C  | -1.437723 | -1.393553 | -1.442544 |
| H  | -1.533480 | -1.334820 | -2.536936 |
| Ru | -1.769740 | 1.430735  | 1.946286  |
| C  | -1.808702 | -0.140232 | 4.815443  |
| H  | -0.754088 | -0.173228 | 5.181733  |
| H  | -2.226995 | 0.844207  | 5.106404  |
| C  | -2.630073 | -1.256652 | 5.448208  |
| C  | -4.041056 | -1.218532 | 5.340911  |
| C  | -2.029227 | -2.388161 | 6.032897  |
| C  | -4.824898 | -2.289156 | 5.802138  |
| C  | -2.811787 | -3.463208 | 6.497021  |
| C  | -4.210600 | -3.418965 | 6.378893  |
| H  | -4.511988 | -0.337092 | 4.874572  |
| H  | -0.930327 | -2.429884 | 6.119183  |
| H  | -5.922822 | -2.240974 | 5.718105  |
| H  | -2.324020 | -4.342115 | 6.948602  |
| H  | -4.824246 | -4.260148 | 6.738621  |
| C  | -0.187094 | 3.258341  | -0.701007 |
| C  | -3.332647 | 3.660087  | -0.437298 |
| C  | -4.552615 | 2.978075  | 0.226056  |
| H  | -5.441215 | 3.637363  | 0.116519  |
| H  | -4.803389 | 2.011478  | -0.260229 |
| H  | -4.388740 | 2.769416  | 1.302625  |
| C  | -3.635288 | 3.865690  | -1.936438 |
| H  | -2.843268 | 4.425135  | -2.466511 |
| H  | -3.799121 | 2.907927  | -2.472274 |
| H  | -4.574299 | 4.453660  | -2.036444 |
| C  | -3.082801 | 5.018812  | 0.249657  |
| H  | -4.008250 | 5.633001  | 0.198931  |
| H  | -2.818476 | 4.898861  | 1.319973  |
| H  | -2.278614 | 5.597990  | -0.247749 |
| C  | -0.295916 | 3.977974  | -2.057442 |

|   |           |           |           |
|---|-----------|-----------|-----------|
| H | 0.722098  | 4.261449  | -2.404852 |
| H | -0.743112 | 3.336480  | -2.845593 |
| H | -0.887454 | 4.912411  | -1.990652 |
| C | 0.347932  | 4.227754  | 0.375654  |
| H | -0.321476 | 5.094888  | 0.537197  |
| H | 0.476016  | 3.712056  | 1.347834  |
| H | 1.337423  | 4.622091  | 0.056699  |
| C | 0.800994  | 2.075183  | -0.834805 |
| H | 0.851981  | 1.481012  | 0.100334  |
| H | 0.538693  | 1.392372  | -1.669229 |
| H | 1.817674  | 2.473306  | -1.044151 |
| H | -0.196133 | 1.598960  | 1.980008  |
| C | -1.853868 | 2.928010  | 3.013412  |
| O | -1.877370 | 3.901607  | 3.677601  |
| P | -1.840305 | 2.505539  | -0.061839 |
| O | -4.070900 | 0.503278  | 2.543044  |
| C | -5.101718 | -0.236762 | 1.957349  |
| C | -4.658861 | -1.553317 | 1.307621  |
| H | -5.566130 | -2.071586 | 0.900685  |
| H | -3.986800 | -1.347005 | 0.445457  |
| O | -3.926596 | -2.399829 | 2.189817  |
| H | -4.288727 | -2.296530 | 3.094938  |
| H | -3.150824 | -0.113169 | 2.983457  |
| H | -5.880799 | -0.491188 | 2.731318  |
| H | -5.640874 | 0.367994  | 1.185198  |

71

C SCF Done: -1748.32306359 A.U.

Number of imaginary frequencies = 0

|    |           |           |           |
|----|-----------|-----------|-----------|
| C  | -2.402717 | -0.154274 | -0.875944 |
| H  | -2.511228 | 1.350202  | -2.454859 |
| N  | -3.174386 | -0.395497 | 3.036836  |
| C  | -2.090997 | -1.323969 | 2.619553  |
| C  | -2.036320 | -1.398074 | 1.111557  |
| N  | -2.392704 | -0.251233 | 0.480981  |
| C  | -2.910891 | 1.147987  | -1.440554 |
| H  | -2.216695 | -2.337832 | 3.059874  |
| H  | -1.127766 | -0.907401 | 2.991919  |
| H  | -4.019311 | 1.064674  | -1.505714 |
| C  | -1.633288 | -2.524267 | 0.379171  |
| H  | -1.359066 | -3.451541 | 0.903304  |
| C  | -1.594369 | -2.437500 | -1.022901 |
| H  | -1.275247 | -3.303944 | -1.622697 |
| C  | -1.983506 | -1.245517 | -1.656966 |
| H  | -1.981198 | -1.160770 | -2.753727 |
| Ru | -3.033330 | 1.343596  | 1.693756  |
| C  | -3.216008 | -0.155160 | 4.496425  |
| H  | -2.292426 | 0.388644  | 4.785321  |
| H  | -4.059302 | 0.546506  | 4.670943  |
| C  | -3.398297 | -1.408347 | 5.339964  |
| C  | -4.323596 | -2.407543 | 4.958907  |

|   |           |           |           |
|---|-----------|-----------|-----------|
| C | -2.661269 | -1.582711 | 6.529040  |
| C | -4.504900 | -3.549457 | 5.757018  |
| C | -2.849309 | -2.721334 | 7.332448  |
| C | -3.772490 | -3.708927 | 6.947752  |
| H | -4.892642 | -2.303299 | 4.018615  |
| H | -1.930624 | -0.813579 | 6.830829  |
| H | -5.226654 | -4.321282 | 5.445104  |
| H | -2.266589 | -2.839733 | 8.260020  |
| H | -3.918439 | -4.604354 | 7.572699  |
| C | -0.861535 | 3.150058  | -0.493321 |
| C | -3.926312 | 3.881673  | -0.783752 |
| C | -5.310786 | 3.466947  | -0.235192 |
| H | -6.075048 | 4.170864  | -0.631570 |
| H | -5.587662 | 2.430958  | -0.512264 |
| H | -5.337182 | 3.509453  | 0.870523  |
| C | -4.016940 | 3.988049  | -2.321746 |
| H | -3.055553 | 4.244826  | -2.803841 |
| H | -4.397454 | 3.052231  | -2.779296 |
| H | -4.741586 | 4.790234  | -2.583742 |
| C | -3.551459 | 5.245685  | -0.166266 |
| H | -4.376123 | 5.966413  | -0.357957 |
| H | -3.423462 | 5.174062  | 0.933608  |
| H | -2.630047 | 5.678928  | -0.603732 |
| C | -0.648867 | 3.873802  | -1.836257 |
| H | 0.433122  | 4.099242  | -1.962106 |
| H | -0.954201 | 3.250994  | -2.703277 |
| H | -1.189523 | 4.838882  | -1.891328 |
| C | -0.452866 | 4.061049  | 0.685545  |
| H | -1.013046 | 5.014998  | 0.704146  |
| H | -0.614686 | 3.545415  | 1.653788  |
| H | 0.627241  | 4.310591  | 0.597740  |
| C | 0.036718  | 1.890981  | -0.464156 |
| H | -0.117311 | 1.305651  | 0.464512  |
| H | -0.135387 | 1.225957  | -1.335422 |
| H | 1.101668  | 2.208168  | -0.499385 |
| H | -1.523922 | 1.553608  | 2.237394  |
| C | -3.476466 | 2.772531  | 2.767956  |
| O | -3.718374 | 3.706009  | 3.447042  |
| P | -2.670307 | 2.550063  | -0.197279 |
| O | -5.000598 | 0.672979  | 0.904012  |
| C | -6.103069 | 0.712453  | 1.770138  |
| C | -6.577352 | -0.770570 | 1.979874  |
| H | -6.975598 | -0.943588 | 3.004399  |
| H | -7.380190 | -1.042575 | 1.251374  |
| O | -5.418272 | -1.577715 | 1.759457  |
| H | -4.953750 | -0.902990 | 1.121524  |
| H | -4.078397 | -0.847474 | 2.741128  |
| H | -5.842042 | 1.152671  | 2.767290  |
| H | -6.944793 | 1.331852  | 1.365858  |

B1 SCF Done: -1747.10389755 A.U.

Number of imaginary frequencies = 0

|    |           |           |           |
|----|-----------|-----------|-----------|
| C  | 0.530521  | 0.074398  | -0.614147 |
| H  | 0.994645  | 1.390401  | -2.287640 |
| N  | 0.178760  | 0.352382  | 3.418811  |
| C  | 0.624110  | -0.973261 | 2.954856  |
| C  | 0.521874  | -1.098617 | 1.449160  |
| N  | 0.604839  | 0.064447  | 0.747705  |
| C  | 0.506640  | 1.422098  | -1.291701 |
| H  | 0.060435  | -1.799624 | 3.446550  |
| H  | 1.695125  | -1.100694 | 3.240968  |
| H  | -0.568026 | 1.665461  | -1.454613 |
| C  | 0.377436  | -2.328161 | 0.789312  |
| H  | 0.298046  | -3.256620 | 1.374035  |
| C  | 0.334750  | -2.344539 | -0.614223 |
| H  | 0.225646  | -3.297185 | -1.155408 |
| C  | 0.410055  | -1.134861 | -1.321078 |
| H  | 0.349247  | -1.114715 | -2.418940 |
| Ru | 0.698172  | 1.879908  | 1.875896  |
| C  | 0.343770  | 0.567925  | 4.868724  |
| H  | 1.419014  | 0.476072  | 5.135013  |
| H  | 0.048159  | 1.618192  | 5.068406  |
| C  | -0.509676 | -0.382605 | 5.693286  |
| C  | -1.910562 | -0.392582 | 5.502047  |
| C  | 0.058280  | -1.282516 | 6.616140  |
| C  | -2.721608 | -1.282072 | 6.223990  |
| C  | -0.753513 | -2.172389 | 7.343858  |
| C  | -2.145036 | -2.174366 | 7.148375  |
| H  | -2.359879 | 0.304515  | 4.773234  |
| H  | 1.150852  | -1.285538 | 6.767406  |
| H  | -3.812378 | -1.277695 | 6.068584  |
| H  | -0.295438 | -2.869148 | 8.064083  |
| H  | -2.782386 | -2.871104 | 7.715833  |
| C  | 3.063269  | 2.813324  | -0.605334 |
| C  | 0.311581  | 4.374047  | -0.772923 |
| C  | -1.131973 | 4.324549  | -0.222357 |
| H  | -1.609552 | 5.315568  | -0.383728 |
| H  | -1.742036 | 3.573490  | -0.757933 |
| H  | -1.168061 | 4.088646  | 0.860204  |
| C  | 0.234431  | 4.505645  | -2.309146 |
| H  | 1.220304  | 4.644037  | -2.788485 |
| H  | -0.265568 | 3.633705  | -2.778091 |
| H  | -0.379612 | 5.398936  | -2.558240 |
| C  | 1.042324  | 5.587640  | -0.160491 |
| H  | 0.458228  | 6.508480  | -0.376523 |
| H  | 1.133946  | 5.502909  | 0.941589  |
| H  | 2.053798  | 5.735294  | -0.588930 |
| C  | 3.362849  | 3.390841  | -2.001706 |
| H  | 4.444111  | 3.258242  | -2.226549 |
| H  | 2.796724  | 2.876568  | -2.806261 |
| H  | 3.149869  | 4.475949  | -2.064321 |

|   |           |           |           |
|---|-----------|-----------|-----------|
| C | 3.816790  | 3.621317  | 0.474039  |
| H | 3.522573  | 4.687907  | 0.492349  |
| H | 3.636789  | 3.200898  | 1.483310  |
| H | 4.908604  | 3.578503  | 0.267730  |
| C | 3.565453  | 1.350423  | -0.558862 |
| H | 3.325879  | 0.867085  | 0.409488  |
| H | 3.145077  | 0.728629  | -1.375846 |
| H | 4.670608  | 1.344878  | -0.679502 |
| H | 2.261105  | 1.705832  | 2.113122  |
| C | 0.831177  | 3.448397  | 2.832633  |
| O | 0.954595  | 4.456165  | 3.430810  |
| P | 1.180351  | 2.771699  | -0.163110 |
| C | -2.521985 | 0.620833  | 1.324438  |
| H | -1.988001 | -0.260657 | 0.873360  |
| H | -3.421537 | 0.211502  | 1.864993  |
| O | -1.750591 | 1.435051  | 2.152685  |
| H | -0.840037 | 0.568022  | 3.107835  |
| O | -2.641831 | 1.423655  | -0.978130 |
| C | -2.990286 | 1.515136  | 0.194292  |
| H | -3.596515 | 2.402445  | 0.551960  |

69

TS-B1C1 SCF Done: -1747.08792120 A.U.

Number of imaginary frequencies = 1

Imaginary frequency = -712.39 cm<sup>-1</sup>

|    |           |           |           |
|----|-----------|-----------|-----------|
| C  | -1.582320 | -0.268527 | -0.749692 |
| H  | -1.550900 | 1.278212  | -2.285483 |
| N  | -2.243676 | -0.475159 | 3.189406  |
| C  | -1.289253 | -1.495762 | 2.727919  |
| C  | -1.261507 | -1.545854 | 1.224183  |
| N  | -1.610241 | -0.385306 | 0.608219  |
| C  | -2.047349 | 1.049523  | -1.319925 |
| H  | -1.526944 | -2.503044 | 3.141998  |
| H  | -0.253456 | -1.250990 | 3.077375  |
| H  | -3.137542 | 0.972147  | -1.529059 |
| C  | -0.862356 | -2.663732 | 0.472924  |
| H  | -0.597452 | -3.598202 | 0.988912  |
| C  | -0.807099 | -2.559635 | -0.924045 |
| H  | -0.491101 | -3.420244 | -1.533891 |
| C  | -1.167697 | -1.349405 | -1.542935 |
| H  | -1.142628 | -1.242711 | -2.637482 |
| Ru | -2.151256 | 1.203726  | 1.890477  |
| C  | -2.195134 | -0.285872 | 4.658253  |
| H  | -1.198605 | 0.113415  | 4.958444  |
| H  | -2.954704 | 0.481800  | 4.904316  |
| C  | -2.502199 | -1.563914 | 5.420673  |
| C  | -3.802439 | -2.115612 | 5.358928  |
| C  | -1.504722 | -2.242817 | 6.149888  |
| C  | -4.089887 | -3.321664 | 6.017941  |
| C  | -1.793898 | -3.449145 | 6.813642  |
| C  | -3.088958 | -3.991631 | 6.747385  |

|   |           |           |           |
|---|-----------|-----------|-----------|
| H | -4.576636 | -1.585889 | 4.780250  |
| H | -0.487625 | -1.817638 | 6.198770  |
| H | -5.107094 | -3.742273 | 5.964863  |
| H | -1.005222 | -3.966580 | 7.383711  |
| H | -3.319519 | -4.936552 | 7.265534  |
| C | -0.112277 | 3.118764  | -0.342973 |
| C | -3.214140 | 3.694499  | -0.621257 |
| C | -4.574062 | 3.141207  | -0.141232 |
| H | -5.385031 | 3.827099  | -0.469471 |
| H | -4.801016 | 2.137812  | -0.559321 |
| H | -4.611574 | 3.063664  | 0.962263  |
| C | -3.276232 | 3.892920  | -2.150856 |
| H | -2.342017 | 4.302046  | -2.575541 |
| H | -3.517382 | 2.952645  | -2.687693 |
| H | -4.088393 | 4.614784  | -2.388129 |
| C | -2.959428 | 5.039776  | 0.091069  |
| H | -3.821922 | 5.718578  | -0.085717 |
| H | -2.855378 | 4.910374  | 1.188267  |
| H | -2.055050 | 5.554151  | -0.290290 |
| C | 0.053008  | 3.895252  | -1.662566 |
| H | 1.124582  | 4.160369  | -1.798147 |
| H | -0.248030 | 3.296535  | -2.547647 |
| H | -0.518650 | 4.844098  | -1.670291 |
| C | 0.269002  | 4.015985  | 0.855429  |
| H | -0.357610 | 4.925758  | 0.924060  |
| H | 0.176068  | 3.464913  | 1.812357  |
| H | 1.325111  | 4.345438  | 0.745518  |
| C | 0.838303  | 1.897667  | -0.364472 |
| H | 0.716657  | 1.267002  | 0.539117  |
| H | 0.691828  | 1.258935  | -1.259684 |
| H | 1.889057  | 2.259400  | -0.389058 |
| H | -0.618943 | 1.421808  | 2.230510  |
| C | -2.493366 | 2.636878  | 3.010852  |
| O | -2.665698 | 3.580562  | 3.690939  |
| P | -1.887994 | 2.427958  | -0.039509 |
| O | -4.440627 | -1.192560 | 2.244493  |
| C | -4.830501 | 0.028526  | 1.861410  |
| C | -5.337731 | 0.970260  | 2.955844  |
| H | -5.694033 | 1.981226  | 2.577103  |
| O | -5.352045 | 0.699388  | 4.142567  |
| H | -3.416563 | -0.944198 | 2.814223  |
| H | -3.972715 | 0.704779  | 1.348624  |
| H | -5.551451 | 0.054512  | 0.998077  |

30

II SCF Done: -521.709353387 A.U.

Number of imaginary frequencies = 0

|   |           |           |           |
|---|-----------|-----------|-----------|
| C | -2.322716 | 1.361662  | 0.082655  |
| H | -2.612585 | 1.810179  | -0.899283 |
| H | -3.262560 | 1.277590  | 0.687673  |
| C | -1.878977 | -0.081296 | -0.170729 |

|   |           |           |           |
|---|-----------|-----------|-----------|
| H | -1.161304 | -0.468301 | 0.614680  |
| O | -1.315087 | 2.091225  | 0.769633  |
| H | -1.736084 | 2.864097  | 1.185714  |
| O | -2.421743 | -0.798385 | -0.994675 |
| N | 0.255041  | 0.770787  | -1.153067 |
| H | 0.412413  | 0.313702  | -2.060222 |
| H | 0.091159  | 1.772162  | -1.315512 |
| C | 1.364423  | 0.568616  | -0.224247 |
| H | 1.066841  | 1.037338  | 0.739067  |
| H | 1.452029  | -0.523133 | -0.021936 |
| C | 2.728232  | 1.118777  | -0.676981 |
| H | 2.628580  | 2.211178  | -0.877799 |
| H | 3.004982  | 0.654899  | -1.652652 |
| C | 3.851662  | 0.883795  | 0.342370  |
| H | 3.563692  | 1.340854  | 1.317474  |
| H | 3.944888  | -0.209002 | 0.542133  |
| C | 5.214933  | 1.437153  | -0.095844 |
| H | 5.122330  | 2.530280  | -0.295398 |
| H | 5.501952  | 0.980156  | -1.071545 |
| C | 6.338311  | 1.201158  | 0.924954  |
| H | 6.047511  | 1.657693  | 1.898737  |
| H | 6.427185  | 0.108383  | 1.122750  |
| C | 7.695486  | 1.757875  | 0.477230  |
| H | 7.644206  | 2.854856  | 0.306416  |
| H | 8.487172  | 1.573430  | 1.232938  |
| H | 8.026999  | 1.292275  | -0.475886 |

30

TS-II-III SCF Done: -521.668339812 A.U.

Number of imaginary frequencies = 1

Imaginary frequency = -1345.99 cm<sup>-1</sup>

|   |           |           |           |
|---|-----------|-----------|-----------|
| C | -2.715130 | 1.324465  | -0.285807 |
| H | -2.756214 | 1.624494  | -1.363440 |
| H | -3.674237 | 0.804670  | -0.048236 |
| C | -1.586711 | 0.286513  | -0.157772 |
| H | -1.556236 | -0.090011 | 0.909025  |
| O | -2.440650 | 2.421774  | 0.586916  |
| H | -3.173524 | 3.059769  | 0.513360  |
| O | -1.477466 | -0.603267 | -1.153236 |
| N | -0.224773 | 1.060143  | -0.408528 |
| H | -0.392372 | 0.312877  | -1.338374 |
| H | -0.340983 | 2.086035  | -0.502291 |
| C | 0.905043  | 0.716026  | 0.474972  |
| H | 0.730674  | 1.146621  | 1.485437  |
| H | 0.894655  | -0.390906 | 0.576115  |
| C | 2.246844  | 1.186837  | -0.092323 |
| H | 2.224123  | 2.292922  | -0.229548 |
| H | 2.380445  | 0.753469  | -1.108891 |
| C | 3.438001  | 0.806223  | 0.798420  |
| H | 3.292082  | 1.236518  | 1.816122  |
| H | 3.452960  | -0.298976 | 0.939251  |



|   |          |           |           |
|---|----------|-----------|-----------|
| C | 4.791824 | 1.267157  | 0.240313  |
| H | 4.774910 | 2.372795  | 0.097532  |
| H | 4.935948 | 0.837059  | -0.777925 |
| C | 5.987644 | 0.887555  | 1.126549  |
| H | 5.838634 | 1.317138  | 2.143607  |
| H | 6.000038 | -0.217340 | 1.267782  |
| C | 7.335210 | 1.352186  | 0.560670  |
| H | 7.363109 | 2.456803  | 0.442115  |
| H | 8.179997 | 1.064852  | 1.220442  |
| H | 7.525938 | 0.908956  | -0.440348 |

30

III SCF Done: -521.719790545 A.U.

Number of imaginary frequencies = 0

|   |           |           |           |
|---|-----------|-----------|-----------|
| C | -2.492176 | 1.339751  | -0.028360 |
| H | -2.547524 | 2.106668  | -0.843631 |
| H | -3.528070 | 0.946403  | 0.121321  |
| C | -1.604274 | 0.196159  | -0.537794 |
| H | -1.527969 | -0.566798 | 0.281317  |
| O | -1.919765 | 1.846540  | 1.169050  |
| H | -2.473105 | 2.586467  | 1.475527  |
| O | -2.266342 | -0.311687 | -1.686434 |
| N | -0.244279 | 0.566316  | -0.881588 |
| H | -1.568709 | -0.811050 | -2.156934 |
| H | -0.243790 | 1.449798  | -1.410745 |
| C | 0.755694  | 0.602252  | 0.189054  |
| H | 0.537955  | 1.381645  | 0.958696  |
| H | 0.712412  | -0.373950 | 0.723814  |
| C | 2.164653  | 0.806590  | -0.378234 |
| H | 2.203010  | 1.778647  | -0.924542 |
| H | 2.360660  | 0.021256  | -1.142292 |
| C | 3.259295  | 0.790913  | 0.696921  |
| H | 3.033982  | 1.565756  | 1.465863  |
| H | 3.229956  | -0.183136 | 1.238316  |
| C | 4.672602  | 1.020201  | 0.143302  |
| H | 4.703703  | 1.995907  | -0.395638 |
| H | 4.895844  | 0.247315  | -0.628613 |
| C | 5.771377  | 0.998446  | 1.216476  |
| H | 5.543473  | 1.770232  | 1.987004  |
| H | 5.737387  | 0.022619  | 1.752990  |
| C | 7.178852  | 1.229884  | 0.652733  |
| H | 7.251006  | 2.214166  | 0.141670  |
| H | 7.951723  | 1.208725  | 1.449109  |
| H | 7.446086  | 0.451806  | -0.094484 |

40

II-EG SCF Done: -752.082162450 A.U.

Number of imaginary frequencies = 0

|   |           |          |           |
|---|-----------|----------|-----------|
| C | -2.873424 | 1.273638 | -0.162062 |
| H | -3.124350 | 1.771878 | -1.131380 |
| H | -3.845204 | 0.994337 | 0.319925  |

|   |           |           |           |
|---|-----------|-----------|-----------|
| C | -2.179537 | -0.047401 | -0.484882 |
| H | -1.671074 | -0.502985 | 0.413660  |
| O | -2.060363 | 2.067108  | 0.691026  |
| H | -2.619662 | 2.765009  | 1.075738  |
| O | -2.565424 | -0.739120 | -1.448778 |
| N | -0.294933 | 0.771274  | -1.033339 |
| H | -0.112113 | 0.108585  | -1.812971 |
| H | -0.422724 | 1.726363  | -1.391102 |
| C | 0.735663  | 0.694088  | 0.003756  |
| H | 0.401670  | 1.317929  | 0.858915  |
| H | 0.754545  | -0.354771 | 0.371503  |
| C | 2.152152  | 1.087426  | -0.451813 |
| H | 2.228025  | 2.194570  | -0.553042 |
| H | 2.326742  | 0.677100  | -1.472974 |
| C | 3.240439  | 0.555577  | 0.492047  |
| H | 3.048879  | 0.921827  | 1.527185  |
| H | 3.144111  | -0.553868 | 0.541407  |
| C | 4.666432  | 0.933287  | 0.070753  |
| H | 4.762348  | 2.043361  | 0.030156  |
| H | 4.846714  | 0.581914  | -0.972397 |
| C | 5.754507  | 0.362480  | 0.992687  |
| H | 5.570953  | 0.713580  | 2.033801  |
| H | 5.652747  | -0.746567 | 1.032123  |
| C | 7.178077  | 0.737190  | 0.562620  |
| H | 7.317432  | 1.839652  | 0.550734  |
| H | 7.941883  | 0.310654  | 1.245628  |
| H | 7.400110  | 0.367528  | -0.461729 |
| O | -0.355973 | -1.804554 | -2.426431 |
| H | -1.304290 | -1.591067 | -2.171950 |
| C | 0.187743  | -2.555006 | -1.355486 |
| H | -0.142010 | -3.623480 | -1.373818 |
| H | -0.116370 | -2.153915 | -0.356642 |
| C | 1.712852  | -2.486761 | -1.431074 |
| H | 1.995917  | -1.432225 | -1.670210 |
| H | 2.078958  | -3.118927 | -2.276261 |
| O | 2.235336  | -2.906215 | -0.171710 |
| H | 3.201389  | -2.991995 | -0.262816 |

40

TS-II-III-EG SCF Done: -752.069863036 A.U.

Number of imaginary frequencies = 1

Imaginary frequency = 805.46  $\text{cm}^{-1}$

|   |           |           |           |
|---|-----------|-----------|-----------|
| C | -1.371624 | 1.703509  | -0.472552 |
| H | -1.106224 | 2.239200  | -1.409447 |
| H | -2.416019 | 2.003759  | -0.218835 |
| C | -1.414690 | 0.196609  | -0.765238 |
| H | -1.457675 | -0.364430 | 0.222824  |
| O | -0.428139 | 2.095800  | 0.519085  |
| H | -0.709385 | 1.699407  | 1.365252  |
| O | -2.341109 | -0.117739 | -1.670062 |
| N | 0.005692  | -0.309143 | -1.313745 |

|   |           |           |           |
|---|-----------|-----------|-----------|
| H | -0.358512 | -1.296698 | -1.773826 |
| H | 0.252698  | 0.296870  | -2.113207 |
| C | 1.155971  | -0.480984 | -0.384692 |
| H | 0.742184  | -0.534446 | 0.644780  |
| H | 1.621192  | -1.469570 | -0.591436 |
| C | 2.199496  | 0.633208  | -0.483643 |
| H | 1.691893  | 1.600655  | -0.286025 |
| H | 2.600950  | 0.668742  | -1.523213 |
| C | 3.359650  | 0.444298  | 0.503402  |
| H | 2.955276  | 0.415765  | 1.541666  |
| H | 3.838314  | -0.549067 | 0.339454  |
| C | 4.425085  | 1.545376  | 0.405941  |
| H | 3.942286  | 2.537664  | 0.561796  |
| H | 4.833578  | 1.571749  | -0.631065 |
| C | 5.581302  | 1.377789  | 1.403060  |
| H | 5.169251  | 1.351898  | 2.437809  |
| H | 6.057421  | 0.382882  | 1.246097  |
| C | 6.640739  | 2.481473  | 1.295642  |
| H | 6.198434  | 3.483582  | 1.482712  |
| H | 7.462622  | 2.336199  | 2.027035  |
| H | 7.094824  | 2.506446  | 0.281690  |
| O | -1.338833 | -2.249937 | -2.219904 |
| H | -2.008972 | -1.278395 | -2.036063 |
| C | -1.606570 | -3.173890 | -1.182138 |
| H | -1.113039 | -4.150747 | -1.397434 |
| H | -1.208430 | -2.835802 | -0.185971 |
| C | -3.110849 | -3.401996 | -1.018026 |
| H | -3.587505 | -2.408236 | -0.821296 |
| H | -3.516619 | -3.771563 | -1.993553 |
| O | -3.301883 | -4.326146 | 0.046661  |
| H | -4.260288 | -4.467692 | 0.144531  |

33

II-H2O SCF Done: -598.185363585 A.U.

Number of imaginary frequencies = 0

|   |           |           |           |
|---|-----------|-----------|-----------|
| C | -2.569885 | 1.250258  | 0.134470  |
| H | -2.626344 | 2.092979  | -0.598421 |
| H | -3.625412 | 1.001897  | 0.418554  |
| C | -2.048586 | 0.020937  | -0.601573 |
| H | -1.599931 | -0.745784 | 0.096521  |
| O | -1.761544 | 1.526996  | 1.266604  |
| H | -2.213196 | 2.204827  | 1.799866  |
| O | -2.516983 | -0.284438 | -1.715996 |
| N | -0.060638 | 0.672370  | -0.998870 |
| H | 0.101892  | -0.101730 | -1.682688 |
| H | -0.135684 | 1.555592  | -1.521730 |
| C | 0.953585  | 0.725990  | 0.054632  |
| H | 0.657741  | 1.513940  | 0.777763  |
| H | 0.897999  | -0.232637 | 0.618201  |
| C | 2.388878  | 0.948099  | -0.448530 |
| H | 2.431675  | 1.906469  | -1.016716 |

|   |           |           |           |
|---|-----------|-----------|-----------|
| H | 2.648413  | 0.149532  | -1.180699 |
| C | 3.427454  | 0.975007  | 0.681780  |
| H | 3.152599  | 1.767500  | 1.416030  |
| H | 3.380520  | 0.015718  | 1.247741  |
| C | 4.865021  | 1.207548  | 0.195881  |
| H | 4.912606  | 2.167955  | -0.368459 |
| H | 5.137444  | 0.416257  | -0.540662 |
| C | 5.905840  | 1.230327  | 1.325405  |
| H | 5.629060  | 2.020675  | 2.060303  |
| H | 5.854858  | 0.269618  | 1.887242  |
| C | 7.338092  | 1.463900  | 0.829018  |
| H | 7.425672  | 2.434168  | 0.294238  |
| H | 8.068058  | 1.475253  | 1.664991  |
| H | 7.652975  | 0.668451  | 0.119711  |
| O | -0.422674 | -1.641262 | -2.657867 |
| H | -0.378666 | -2.401723 | -2.047442 |
| H | -1.340734 | -1.274998 | -2.471069 |

33

TS-II-III-H2O SCF Done: -598.172451561 A.U.

Number of imaginary frequencies = 1

Imaginary frequency = -892.26 cm<sup>-1</sup>

|   |           |           |           |
|---|-----------|-----------|-----------|
| C | -1.234424 | 1.979267  | -0.306284 |
| H | -0.868681 | 2.466692  | -1.235499 |
| H | -2.244913 | 2.404855  | -0.098225 |
| C | -1.446165 | 0.483633  | -0.587160 |
| H | -1.559564 | -0.054945 | 0.413038  |
| O | -0.291108 | 2.272342  | 0.720634  |
| H | -0.653811 | 1.925401  | 1.557288  |
| O | -2.389906 | 0.268671  | -1.498335 |
| N | -0.097836 | -0.196909 | -1.112641 |
| H | -0.596895 | -1.194384 | -1.476508 |
| H | 0.162685  | 0.303699  | -1.978369 |
| C | 1.068759  | -0.374791 | -0.210467 |
| H | 0.692124  | -0.323528 | 0.833189  |
| H | 1.470355  | -1.402262 | -0.357480 |
| C | 2.175137  | 0.661333  | -0.420658 |
| H | 1.740286  | 1.670467  | -0.263654 |
| H | 2.533304  | 0.607268  | -1.475135 |
| C | 3.362104  | 0.460657  | 0.531436  |
| H | 3.000258  | 0.524207  | 1.583708  |
| H | 3.771194  | -0.569908 | 0.414522  |
| C | 4.488797  | 1.482214  | 0.321967  |
| H | 4.075809  | 2.511330  | 0.433003  |
| H | 4.852933  | 1.418472  | -0.729860 |
| C | 5.674619  | 1.301940  | 1.281408  |
| H | 5.306957  | 1.366036  | 2.331129  |
| H | 6.081167  | 0.270672  | 1.169627  |
| C | 6.794677  | 2.326408  | 1.062230  |
| H | 6.423609  | 3.364449  | 1.202291  |
| H | 7.637073  | 2.173587  | 1.768366  |

|   |           |           |           |
|---|-----------|-----------|-----------|
| H | 7.204936  | 2.260130  | 0.031583  |
| O | -1.650643 | -1.991365 | -1.943084 |
| H | -1.983827 | -2.550956 | -1.215210 |
| H | -2.218001 | -0.950988 | -1.804019 |

71

TS-CD SCF Done: -1748.29392612 A.U.

Number of imaginary frequencies = 1

Imaginary frequency = -56.62 cm<sup>-1</sup>

|    |           |           |           |
|----|-----------|-----------|-----------|
| Ru | -0.121526 | -0.750161 | -0.731325 |
| H  | -0.607269 | -2.260054 | -1.266879 |
| P  | -2.175528 | -0.086834 | -0.023082 |
| O  | -0.615915 | 0.421126  | -3.472511 |
| N  | 1.926361  | -1.625814 | -0.711650 |
| N  | 0.026255  | -1.457795 | 1.255979  |
| C  | -1.891674 | -0.064285 | 1.833744  |
| C  | -0.828887 | -1.050091 | 2.235744  |
| C  | -0.644943 | -1.484479 | 3.560072  |
| H  | -1.347512 | -1.150568 | 4.337532  |
| C  | 0.449178  | -2.303291 | 3.878264  |
| H  | 0.612793  | -2.636081 | 4.914790  |
| C  | 1.344041  | -2.676766 | 2.861506  |
| H  | 2.223172  | -3.303102 | 3.074434  |
| C  | 1.095046  | -2.241148 | 1.552447  |
| C  | 1.915388  | -2.656889 | 0.359018  |
| H  | 2.945666  | -2.953574 | 0.663479  |
| H  | 1.424965  | -3.555400 | -0.081193 |
| C  | -0.363990 | -0.062127 | -2.427036 |
| C  | -2.811971 | 1.694318  | -0.375650 |
| C  | -1.581383 | 2.630148  | -0.422740 |
| H  | -1.940838 | 3.671992  | -0.573071 |
| H  | -0.991146 | 2.609743  | 0.516260  |
| H  | -0.904469 | 2.375174  | -1.259571 |
| C  | -3.509428 | 1.724556  | -1.752669 |
| H  | -3.738038 | 2.779832  | -2.018073 |
| H  | -2.861133 | 1.314175  | -2.552860 |
| H  | -4.470159 | 1.171972  | -1.755147 |
| C  | -3.769048 | 2.213706  | 0.721433  |
| H  | -4.674782 | 1.592643  | 0.845952  |
| H  | -3.265833 | 2.300251  | 1.705489  |
| H  | -4.107434 | 3.236000  | 0.443742  |
| C  | -3.593249 | -1.375495 | -0.260657 |
| C  | -3.687167 | -1.723716 | -1.762118 |
| H  | -4.034205 | -0.871251 | -2.376981 |
| H  | -2.700219 | -2.050837 | -2.147543 |
| H  | -4.412529 | -2.554922 | -1.901928 |
| C  | -4.964149 | -0.923352 | 0.275731  |
| H  | -5.686039 | -1.764947 | 0.185598  |
| H  | -4.927066 | -0.641636 | 1.349162  |
| H  | -5.385584 | -0.072433 | -0.294904 |
| C  | -3.152616 | -2.644341 | 0.506946  |

|   |           |           |           |
|---|-----------|-----------|-----------|
| H | -2.141898 | -2.972755 | 0.189174  |
| H | -3.151986 | -2.496779 | 1.606937  |
| H | -3.867880 | -3.466514 | 0.286768  |
| C | 2.490130  | -2.218130 | -1.961004 |
| H | 1.807840  | -3.042642 | -2.250993 |
| H | 3.487200  | -2.666620 | -1.728055 |
| H | -2.816665 | -0.174967 | 2.435487  |
| C | 1.376540  | 1.427104  | 1.444692  |
| H | 0.461496  | 0.701235  | -0.027556 |
| O | 0.547440  | 1.960440  | 2.188809  |
| C | 2.229471  | 2.189342  | 0.426375  |
| H | 3.122599  | 2.567560  | 0.976479  |
| H | 1.656398  | 3.078894  | 0.070896  |
| O | 2.704932  | 1.367543  | -0.625197 |
| H | 1.788517  | 0.395022  | 1.667884  |
| H | -1.461286 | 0.940300  | 2.050109  |
| H | 1.871158  | 1.004014  | -1.032800 |
| H | 2.525248  | -0.829258 | -0.419062 |
| C | 2.629750  | -1.240896 | -3.103735 |
| C | 3.564609  | -0.185859 | -3.041751 |
| C | 1.832682  | -1.380248 | -4.257468 |
| C | 3.679013  | 0.726617  | -4.102274 |
| H | 4.190208  | -0.054384 | -2.145331 |
| C | 1.956098  | -0.477954 | -5.325749 |
| H | 1.085512  | -2.188486 | -4.302082 |
| C | 2.876327  | 0.580871  | -5.248110 |
| H | 4.398227  | 1.557560  | -4.030756 |
| H | 1.313718  | -0.590380 | -6.212774 |
| H | 2.965520  | 1.297882  | -6.079681 |

71

D SCF Done: -1748.29662462 A.U.

Number of imaginary frequencies = 0

|    |           |           |           |
|----|-----------|-----------|-----------|
| Ru | -0.113020 | -0.762569 | -0.794152 |
| H  | -0.600702 | -2.307488 | -1.244973 |
| P  | -2.151604 | -0.073941 | -0.077769 |
| O  | -0.598995 | 0.251343  | -3.601193 |
| N  | 1.937499  | -1.636654 | -0.760195 |
| N  | 0.065056  | -1.409676 | 1.204815  |
| C  | -1.850737 | -0.012523 | 1.779196  |
| C  | -0.781645 | -0.988227 | 2.188493  |
| C  | -0.585446 | -1.400795 | 3.517562  |
| H  | -1.277318 | -1.048454 | 4.296570  |
| C  | 0.504214  | -2.225695 | 3.838194  |
| H  | 0.677886  | -2.541069 | 4.878432  |
| C  | 1.376193  | -2.634160 | 2.814301  |
| H  | 2.244706  | -3.276038 | 3.024858  |
| C  | 1.117909  | -2.218119 | 1.501005  |
| C  | 1.905844  | -2.674354 | 0.300736  |
| H  | 2.928658  | -3.008463 | 0.592604  |
| H  | 1.371125  | -3.551398 | -0.131978 |

|   |           |           |           |
|---|-----------|-----------|-----------|
| C | -0.361120 | -0.168075 | -2.527363 |
| C | -2.788137 | 1.704700  | -0.451453 |
| C | -1.561440 | 2.645223  | -0.498432 |
| H | -1.923142 | 3.684148  | -0.663505 |
| H | -0.979415 | 2.637416  | 0.446066  |
| H | -0.871697 | 2.378792  | -1.320800 |
| C | -3.468438 | 1.713249  | -1.837402 |
| H | -3.695414 | 2.763204  | -2.124640 |
| H | -2.810407 | 1.288053  | -2.622149 |
| H | -4.428141 | 1.158825  | -1.841692 |
| C | -3.758790 | 2.238492  | 0.626695  |
| H | -4.672129 | 1.627125  | 0.739282  |
| H | -3.272633 | 2.325928  | 1.619449  |
| H | -4.083278 | 3.262411  | 0.338337  |
| C | -3.582038 | -1.358804 | -0.268739 |
| C | -3.684760 | -1.746907 | -1.760030 |
| H | -4.019616 | -0.906000 | -2.397584 |
| H | -2.704091 | -2.100207 | -2.138144 |
| H | -4.423930 | -2.569772 | -1.875242 |
| C | -4.949277 | -0.887747 | 0.259947  |
| H | -5.673038 | -1.730384 | 0.198510  |
| H | -4.907416 | -0.573537 | 1.324163  |
| H | -5.372020 | -0.054236 | -0.335044 |
| C | -3.143743 | -2.608987 | 0.530190  |
| H | -2.133061 | -2.945198 | 0.219889  |
| H | -3.144790 | -2.435059 | 1.626328  |
| H | -3.859167 | -3.435871 | 0.328868  |
| C | 2.511565  | -2.198749 | -2.012945 |
| H | 1.880924  | -3.068731 | -2.287426 |
| H | 3.540641  | -2.583006 | -1.801144 |
| H | -2.771268 | -0.124865 | 2.387901  |
| C | 1.467823  | 1.488219  | 1.937255  |
| H | 0.455866  | 0.758063  | -0.283964 |
| O | 0.567834  | 2.125696  | 2.463515  |
| C | 2.488390  | 2.052850  | 0.954106  |
| H | 3.431753  | 2.220272  | 1.526619  |
| H | 2.128054  | 3.049214  | 0.601792  |
| O | 2.766118  | 1.148690  | -0.096424 |
| H | 1.643826  | 0.396898  | 2.181074  |
| H | -1.441643 | 1.002729  | 1.982280  |
| H | 1.832892  | 0.928440  | -0.459342 |
| H | 2.536790  | -0.856258 | -0.427363 |
| C | 2.554128  | -1.223593 | -3.167938 |
| C | 3.193012  | 0.029251  | -3.048231 |
| C | 1.952871  | -1.567821 | -4.395046 |
| C | 3.207032  | 0.923798  | -4.130381 |
| H | 3.657002  | 0.332702  | -2.096757 |
| C | 1.980419  | -0.680013 | -5.482433 |
| H | 1.429959  | -2.533368 | -4.488742 |
| C | 2.603501  | 0.571723  | -5.350922 |
| H | 3.691824  | 1.906417  | -4.016156 |

|   |          |           |           |
|---|----------|-----------|-----------|
| H | 1.491257 | -0.958916 | -6.428820 |
| H | 2.611991 | 1.277615  | -6.196560 |

63

E SCF Done: -1519.12514861 A.U.

Number of imaginary frequencies = 0

|    |           |           |           |
|----|-----------|-----------|-----------|
| Ru | -0.269919 | -0.853997 | -0.919707 |
| H  | -0.749214 | -2.465999 | -1.219436 |
| P  | -2.243551 | -0.117477 | -0.109439 |
| O  | -1.017655 | -0.062473 | -3.740103 |
| N  | 1.793748  | -1.702775 | -0.944441 |
| N  | 0.062938  | -1.346664 | 1.100027  |
| C  | -1.786982 | 0.113385  | 1.708265  |
| C  | -0.715048 | -0.862999 | 2.112910  |
| C  | -0.472192 | -1.247709 | 3.441517  |
| H  | -1.118148 | -0.856825 | 4.241903  |
| C  | 0.599208  | -2.109293 | 3.734822  |
| H  | 0.805939  | -2.409669 | 4.773394  |
| C  | 1.404384  | -2.577309 | 2.682156  |
| H  | 2.253153  | -3.252550 | 2.868681  |
| C  | 1.098098  | -2.187101 | 1.371367  |
| C  | 1.797947  | -2.710595 | 0.144132  |
| H  | 2.826902  | -3.068237 | 0.384918  |
| H  | 1.207390  | -3.576261 | -0.238720 |
| C  | -0.673861 | -0.387833 | -2.657812 |
| C  | -2.945050 | 1.614487  | -0.587618 |
| C  | -1.742596 | 2.550388  | -0.844605 |
| H  | -2.128934 | 3.566709  | -1.080819 |
| H  | -1.074991 | 2.635285  | 0.036953  |
| H  | -1.118550 | 2.199727  | -1.687259 |
| C  | -3.750191 | 1.486155  | -1.899128 |
| H  | -4.017888 | 2.502734  | -2.262112 |
| H  | -3.160251 | 0.992215  | -2.697409 |
| H  | -4.697888 | 0.928489  | -1.762115 |
| C  | -3.821431 | 2.245826  | 0.517799  |
| H  | -4.711221 | 1.642349  | 0.772374  |
| H  | -3.250587 | 2.431722  | 1.450599  |
| H  | -4.186461 | 3.235343  | 0.164235  |
| C  | -3.679997 | -1.417358 | -0.051223 |
| C  | -3.903867 | -1.944583 | -1.485005 |
| H  | -4.306064 | -1.170669 | -2.166834 |
| H  | -2.951263 | -2.322201 | -1.909516 |
| H  | -4.635697 | -2.781765 | -1.458989 |
| C  | -5.001035 | -0.901620 | 0.547534  |
| H  | -5.719338 | -1.747564 | 0.627853  |
| H  | -4.870548 | -0.489542 | 1.570511  |
| H  | -5.482345 | -0.128121 | -0.083009 |
| C  | -3.163867 | -2.587371 | 0.818826  |
| H  | -2.178319 | -2.945856 | 0.455817  |
| H  | -3.078358 | -2.314693 | 1.891193  |
| H  | -3.883424 | -3.432501 | 0.752186  |



|   |           |           |           |
|---|-----------|-----------|-----------|
| C | 2.349431  | -2.264974 | -2.205575 |
| H | 1.588209  | -2.961291 | -2.611812 |
| H | 3.269259  | -2.855784 | -1.970775 |
| H | -2.652091 | 0.093587  | 2.402516  |
| H | 0.448112  | 0.639065  | -0.604383 |
| H | -1.347645 | 1.135377  | 1.748677  |
| H | 2.369550  | -0.893358 | -0.666022 |
| C | 2.691590  | -1.182062 | -3.202727 |
| C | 3.783088  | -0.320480 | -2.956337 |
| C | 1.927274  | -0.995658 | -4.369722 |
| C | 4.090507  | 0.719886  | -3.847276 |
| H | 4.405975  | -0.468749 | -2.056761 |
| C | 2.234205  | 0.041559  | -5.266125 |
| H | 1.067554  | -1.653781 | -4.565106 |
| C | 3.312449  | 0.903879  | -5.005237 |
| H | 4.942279  | 1.387270  | -3.640747 |
| H | 1.614621  | 0.183924  | -6.165042 |
| H | 3.549319  | 1.721189  | -5.704844 |

8

hydroxyacetaldehyde SCF Done: -229.145086713 A.U.

Number of imaginary frequencies = 0

|   |           |           |           |
|---|-----------|-----------|-----------|
| C | -0.330883 | -0.621166 | -0.010586 |
| H | 0.012597  | -0.133583 | 0.939035  |
| H | -1.450580 | -0.651054 | 0.043419  |
| C | 0.154323  | -2.066876 | 0.031807  |
| H | 0.797630  | -2.347927 | -0.860849 |
| O | 0.171920  | -0.014705 | -1.182556 |
| H | -0.139366 | 0.907410  | -1.208085 |
| O | -0.114534 | -2.844523 | 0.923828  |

63

TS-EF SCF Done: -1519.08660283 A.U.

Number of imaginary frequencies = 1

Imaginary frequency = -935.90 cm<sup>-1</sup>

|   |           |           |           |
|---|-----------|-----------|-----------|
| C | -0.603774 | 0.052826  | -0.714578 |
| H | -0.849460 | 1.224051  | -2.539747 |
| N | -1.301497 | 0.523850  | 3.209203  |
| C | -0.201582 | -0.387035 | 2.940243  |
| C | -0.126592 | -0.733602 | 1.472763  |
| N | -0.620236 | 0.216509  | 0.636859  |
| C | -1.288726 | 1.125496  | -1.525879 |
| H | -2.464402 | 0.713864  | 2.351693  |
| H | -0.263836 | -1.323575 | 3.546949  |
| H | 0.785864  | 0.092310  | 3.205660  |
| H | -2.350519 | 0.821613  | -1.661682 |
| C | 0.445101  | -1.909128 | 0.958449  |
| H | 0.834977  | -2.671561 | 1.648992  |
| C | 0.516098  | -2.079761 | -0.432947 |
| H | 0.974056  | -2.985818 | -0.859559 |
| C | -0.015496 | -1.091245 | -1.279030 |

|    |           |           |           |
|----|-----------|-----------|-----------|
| H  | 0.008438  | -1.207275 | -2.372740 |
| Ru | -1.362086 | 1.967006  | 1.575643  |
| C  | -1.351757 | 0.987697  | 4.584398  |
| H  | -0.422181 | 1.551978  | 4.861445  |
| H  | -2.184705 | 1.721631  | 4.661041  |
| C  | -1.583969 | -0.128072 | 5.600579  |
| C  | -2.518357 | -1.151238 | 5.329778  |
| C  | -0.887858 | -0.158597 | 6.825610  |
| C  | -2.756556 | -2.172992 | 6.263321  |
| C  | -1.127294 | -1.176379 | 7.766661  |
| C  | -2.062950 | -2.187892 | 7.488145  |
| H  | -3.047900 | -1.137499 | 4.362906  |
| H  | -0.145797 | 0.628234  | 7.043356  |
| H  | -3.489699 | -2.964051 | 6.035886  |
| H  | -0.574364 | -1.182982 | 8.720002  |
| H  | -2.248870 | -2.988863 | 8.221590  |
| C  | 0.230941  | 3.674218  | -1.154698 |
| C  | -2.937118 | 3.594601  | -1.296651 |
| C  | -4.145975 | 2.913826  | -0.615685 |
| H  | -5.083319 | 3.356347  | -1.018367 |
| H  | -4.183076 | 1.820876  | -0.807536 |
| H  | -4.130523 | 3.053660  | 0.482244  |
| C  | -3.087024 | 3.447957  | -2.826280 |
| H  | -2.269185 | 3.928544  | -3.392736 |
| H  | -3.149518 | 2.386605  | -3.143114 |
| H  | -4.036021 | 3.933337  | -3.144166 |
| C  | -2.925389 | 5.084882  | -0.895087 |
| H  | -3.909295 | 5.540241  | -1.141748 |
| H  | -2.760418 | 5.215019  | 0.194382  |
| H  | -2.151761 | 5.662445  | -1.439308 |
| C  | 0.191144  | 4.164703  | -2.613881 |
| H  | 1.186940  | 4.578824  | -2.886210 |
| H  | -0.027254 | 3.346246  | -3.331732 |
| H  | -0.549323 | 4.974091  | -2.769664 |
| C  | 0.480901  | 4.860867  | -0.198145 |
| H  | -0.308662 | 5.634331  | -0.261874 |
| H  | 0.540423  | 4.514819  | 0.852956  |
| H  | 1.446272  | 5.346221  | -0.460741 |
| C  | 1.394751  | 2.666271  | -0.999532 |
| H  | 1.417208  | 2.229686  | 0.019815  |
| H  | 1.345340  | 1.840846  | -1.739464 |
| H  | 2.356939  | 3.197597  | -1.166217 |
| H  | 0.180054  | 2.451736  | 1.750994  |
| C  | -1.843860 | 3.553266  | 2.392945  |
| O  | -2.114271 | 4.588977  | 2.881764  |
| P  | -1.363030 | 2.754936  | -0.573253 |
| H  | -3.015310 | 1.139619  | 1.626316  |

63

F SCF Done: -1519.10134640 A.U.

Number of imaginary frequencies = 0

|    |           |           |           |
|----|-----------|-----------|-----------|
| C  | -0.742012 | 0.019513  | -0.766199 |
| H  | -0.903993 | 1.232994  | -2.568372 |
| N  | -1.417984 | 0.465714  | 3.176276  |
| C  | -0.299165 | -0.403280 | 2.875473  |
| C  | -0.243138 | -0.766226 | 1.418807  |
| N  | -0.807862 | 0.150328  | 0.588355  |
| C  | -1.392564 | 1.115233  | -1.578941 |
| H  | -3.270784 | 0.972773  | 1.777389  |
| H  | -0.296953 | -1.331988 | 3.499156  |
| H  | 0.703927  | 0.088479  | 3.086181  |
| H  | -2.452157 | 0.835575  | -1.773370 |
| C  | 0.395155  | -1.903749 | 0.892435  |
| H  | 0.836983  | -2.641846 | 1.578131  |
| C  | 0.467521  | -2.064539 | -0.498290 |
| H  | 0.967599  | -2.944795 | -0.931740 |
| C  | -0.099449 | -1.088799 | -1.339230 |
| H  | -0.048776 | -1.183535 | -2.434073 |
| Ru | -1.666442 | 1.828494  | 1.562800  |
| C  | -1.325684 | 0.977669  | 4.532198  |
| H  | -0.379613 | 1.563223  | 4.717290  |
| H  | -2.158854 | 1.698521  | 4.686479  |
| C  | -1.436865 | -0.105053 | 5.606494  |
| C  | -2.345568 | -1.173865 | 5.445289  |
| C  | -0.658846 | -0.056435 | 6.780933  |
| C  | -2.478687 | -2.161000 | 6.435356  |
| C  | -0.792920 | -1.038972 | 7.778733  |
| C  | -1.704186 | -2.096105 | 7.609217  |
| H  | -2.932428 | -1.216932 | 4.512951  |
| H  | 0.065412  | 0.765724  | 6.912037  |
| H  | -3.192523 | -2.989043 | 6.292498  |
| H  | -0.176164 | -0.982742 | 8.690645  |
| H  | -1.807260 | -2.870237 | 8.386749  |
| C  | 0.203441  | 3.575415  | -0.960691 |
| C  | -2.928772 | 3.665515  | -1.425293 |
| C  | -4.238981 | 3.049646  | -0.884788 |
| H  | -5.103191 | 3.553659  | -1.369736 |
| H  | -4.325699 | 1.965168  | -1.109543 |
| H  | -4.333486 | 3.182970  | 0.210671  |
| C  | -2.939350 | 3.561198  | -2.965634 |
| H  | -2.036783 | 3.989502  | -3.437098 |
| H  | -3.046429 | 2.513382  | -3.313883 |
| H  | -3.814419 | 4.122365  | -3.361363 |
| C  | -2.872020 | 5.142296  | -0.979543 |
| H  | -3.802485 | 5.659786  | -1.299788 |
| H  | -2.799830 | 5.234669  | 0.124127  |
| H  | -2.021569 | 5.687940  | -1.433985 |
| C  | 0.334679  | 4.109333  | -2.399467 |
| H  | 1.368582  | 4.489235  | -2.553134 |
| H  | 0.162123  | 3.321107  | -3.162064 |
| H  | -0.353275 | 4.952980  | -2.604795 |
| C  | 0.403869  | 4.722046  | 0.055235  |

|   |           |          |           |
|---|-----------|----------|-----------|
| H | -0.336503 | 5.535857 | -0.065408 |
| H | 0.336160  | 4.347231 | 1.095812  |
| H | 1.413230  | 5.165446 | -0.088996 |
| C | 1.307584  | 2.516528 | -0.725715 |
| H | 1.223156  | 2.053104 | 0.277729  |
| H | 1.295426  | 1.711660 | -1.488928 |
| H | 2.299682  | 3.013794 | -0.789565 |
| H | -0.170012 | 2.304225 | 1.890503  |
| C | -2.203327 | 3.382832 | 2.412602  |
| O | -2.500062 | 4.404658 | 2.913475  |
| P | -1.480890 | 2.715400 | -0.579890 |
| H | -3.339662 | 1.246454 | 0.988251  |

2

H2 SCF Done: -1.17937423914 A.U.

Number of imaginary frequencies = 0

|   |           |           |          |
|---|-----------|-----------|----------|
| H | -0.848630 | -0.249205 | 0.000000 |
| H | -1.616058 | -0.249205 | 0.000000 |

69

G SCF Done: -1747.08030260 A.U.

Number of imaginary frequencies = 0

|    |           |           |           |
|----|-----------|-----------|-----------|
| C  | -0.944162 | -0.061065 | -0.732280 |
| H  | -1.493871 | 1.081029  | -2.503708 |
| N  | -0.764080 | 0.590757  | 3.194663  |
| C  | 0.139996  | -0.454113 | 2.790049  |
| C  | -0.031628 | -0.798691 | 1.332021  |
| N  | -0.721847 | 0.121454  | 0.603497  |
| C  | -1.754189 | 1.006990  | -1.427391 |
| H  | 0.017266  | -1.400121 | 3.384293  |
| H  | 1.226166  | -0.173091 | 2.927306  |
| H  | -2.828982 | 0.723595  | -1.371762 |
| C  | 0.480372  | -1.957775 | 0.724737  |
| H  | 1.034509  | -2.688602 | 1.332851  |
| C  | 0.270390  | -2.161281 | -0.646121 |
| H  | 0.659743  | -3.063657 | -1.142437 |
| C  | -0.452301 | -1.201728 | -1.382742 |
| H  | -0.640476 | -1.337243 | -2.458130 |
| Ru | -1.333092 | 1.858866  | 1.642666  |
| C  | -0.716361 | 0.917030  | 4.612887  |
| H  | 0.239690  | 0.588088  | 5.092142  |
| H  | -0.784072 | 2.016182  | 4.757574  |
| C  | -1.897492 | 0.232188  | 5.287194  |
| C  | -3.178395 | 0.827466  | 5.220691  |
| C  | -1.788731 | -1.072662 | 5.815631  |
| C  | -4.319747 | 0.133253  | 5.651679  |
| C  | -2.931437 | -1.777409 | 6.242972  |
| C  | -4.203285 | -1.178488 | 6.159271  |
| H  | -3.273846 | 1.837825  | 4.790678  |
| H  | -0.794808 | -1.544288 | 5.890784  |
| H  | -5.309540 | 0.613649  | 5.593227  |

|   |           |           |           |
|---|-----------|-----------|-----------|
| H | -2.828008 | -2.796190 | 6.650094  |
| H | -5.098060 | -1.724637 | 6.497242  |
| C | -0.086443 | 3.489823  | -1.278456 |
| C | -3.238703 | 3.564239  | -1.060962 |
| C | -4.387672 | 2.971901  | -0.216872 |
| H | -5.341061 | 3.467939  | -0.503655 |
| H | -4.516004 | 1.881913  | -0.377903 |
| H | -4.221448 | 3.119632  | 0.866691  |
| C | -3.582830 | 3.389263  | -2.555183 |
| H | -2.814961 | 3.803496  | -3.233163 |
| H | -3.745540 | 2.325727  | -2.825945 |
| H | -4.534684 | 3.923302  | -2.771331 |
| C | -3.101508 | 5.060358  | -0.707591 |
| H | -4.084247 | 5.561344  | -0.848667 |
| H | -2.802244 | 5.205445  | 0.351168  |
| H | -2.371442 | 5.584939  | -1.355586 |
| C | -0.275453 | 3.960074  | -2.732648 |
| H | 0.696518  | 4.331482  | -3.126400 |
| H | -0.605068 | 3.139322  | -3.403803 |
| H | -0.999038 | 4.794241  | -2.818959 |
| C | 0.321720  | 4.679676  | -0.381866 |
| H | -0.435660 | 5.486655  | -0.371508 |
| H | 0.484073  | 4.350363  | 0.663792  |
| H | 1.271191  | 5.117183  | -0.761105 |
| C | 1.052584  | 2.442838  | -1.246349 |
| H | 1.194033  | 2.023424  | -0.230114 |
| H | 0.879749  | 1.603744  | -1.951261 |
| H | 2.003053  | 2.933936  | -1.549127 |
| H | 0.148482  | 2.389204  | 1.639392  |
| C | -1.783247 | 3.430633  | 2.493365  |
| O | -2.056319 | 4.460153  | 3.000930  |
| P | -1.641833 | 2.645361  | -0.495429 |
| O | -3.583839 | 0.935149  | 1.895122  |
| C | -4.003963 | -0.122799 | 2.360253  |
| H | -5.070855 | -0.203085 | 2.721422  |
| C | -3.181372 | -1.375317 | 2.530977  |
| H | -2.854911 | -1.715518 | 1.520744  |
| H | -2.249037 | -1.017094 | 3.044127  |
| O | -3.870634 | -2.418200 | 3.180278  |
| H | -3.845007 | -2.218363 | 4.140221  |

22

hexanamine SCF Done: -292.558489620 A.U.

Number of imaginary frequencies = 0

|   |           |           |           |
|---|-----------|-----------|-----------|
| N | -3.216866 | 0.554861  | 0.021678  |
| H | -2.874900 | -0.416311 | 0.067810  |
| H | -2.872158 | 0.998205  | 0.885889  |
| C | -2.620628 | 1.223966  | -1.137265 |
| H | -3.010057 | 0.735192  | -2.060023 |
| H | -3.007008 | 2.268700  | -1.173087 |
| C | -1.080519 | 1.254388  | -1.195254 |

|   |           |          |           |
|---|-----------|----------|-----------|
| H | -0.694369 | 1.746478 | -0.271385 |
| H | -0.697529 | 0.207023 | -1.161440 |
| C | -0.517494 | 1.968219 | -2.431950 |
| H | -0.910809 | 1.476023 | -3.351880 |
| H | -0.907586 | 3.012274 | -2.463669 |
| C | 1.016385  | 1.998702 | -2.490279 |
| H | 1.410503  | 2.491218 | -1.570721 |
| H | 1.407250  | 0.954799 | -2.458922 |
| C | 1.577622  | 2.713437 | -3.728729 |
| H | 1.180933  | 2.219691 | -4.645406 |
| H | 1.184219  | 3.755477 | -3.757568 |
| C | 3.110492  | 2.737751 | -3.776431 |
| H | 3.487592  | 3.259742 | -4.680573 |
| H | 3.532687  | 3.257036 | -2.889044 |
| H | 3.529422  | 1.708283 | -3.784553 |

91

H SCF Done: -2039.68927508 A.U.

Number of imaginary frequencies = 0

|    |           |           |           |
|----|-----------|-----------|-----------|
| C  | -0.820796 | 1.033906  | -1.012607 |
| H  | -1.417201 | 2.756859  | -2.218457 |
| N  | -1.801102 | -0.542623 | 2.601418  |
| C  | -0.427790 | -0.867106 | 2.142599  |
| C  | -0.184487 | -0.462347 | 0.707179  |
| N  | -0.908439 | 0.596138  | 0.270906  |
| C  | -1.829537 | 2.069237  | -1.451611 |
| H  | -0.178882 | -1.940947 | 2.294666  |
| H  | 0.275823  | -0.285033 | 2.781432  |
| H  | -2.673289 | 1.520347  | -1.924595 |
| C  | 0.747877  | -1.091389 | -0.132013 |
| H  | 1.325821  | -1.952411 | 0.235507  |
| C  | 0.919324  | -0.602009 | -1.437685 |
| H  | 1.652851  | -1.068291 | -2.113678 |
| C  | 0.122449  | 0.463287  | -1.886082 |
| H  | 0.201872  | 0.834888  | -2.918432 |
| Ru | -2.451940 | 1.251738  | 1.548032  |
| C  | -1.895948 | -0.513081 | 4.079929  |
| H  | -1.281742 | 0.334729  | 4.447783  |
| H  | -2.948340 | -0.263179 | 4.322581  |
| C  | -1.494502 | -1.809789 | 4.762876  |
| C  | -2.021573 | -3.045072 | 4.322551  |
| C  | -0.600460 | -1.807153 | 5.852764  |
| C  | -1.665882 | -4.244315 | 4.960876  |
| C  | -0.247150 | -3.005825 | 6.498075  |
| C  | -0.778767 | -4.228541 | 6.053140  |
| H  | -2.713447 | -3.057624 | 3.465055  |
| H  | -0.176832 | -0.850533 | 6.201697  |
| H  | -2.086146 | -5.198865 | 4.605416  |
| H  | 0.451230  | -2.984287 | 7.349957  |
| H  | -0.500790 | -5.168991 | 6.554900  |
| C  | -1.453075 | 4.451095  | 0.317409  |

|   |           |           |           |
|---|-----------|-----------|-----------|
| C | -4.324488 | 3.510475  | -0.631208 |
| C | -5.285271 | 2.304932  | -0.521307 |
| H | -6.280267 | 2.612350  | -0.911822 |
| H | -4.962080 | 1.416261  | -1.096838 |
| H | -5.415224 | 1.986829  | 0.531098  |
| C | -4.282733 | 3.980661  | -2.101078 |
| H | -3.594912 | 4.829786  | -2.271003 |
| H | -4.002448 | 3.159878  | -2.791942 |
| H | -5.300481 | 4.314681  | -2.400303 |
| C | -4.861331 | 4.633799  | 0.281655  |
| H | -5.918207 | 4.845117  | 0.008996  |
| H | -4.849133 | 4.332936  | 1.349582  |
| H | -4.299201 | 5.582447  | 0.173112  |
| C | -1.524143 | 5.517961  | -0.791652 |
| H | -0.758272 | 6.300464  | -0.595269 |
| H | -1.308603 | 5.098573  | -1.796983 |
| H | -2.506500 | 6.028321  | -0.830242 |
| C | -1.785697 | 5.075812  | 1.690310  |
| H | -2.778980 | 5.562555  | 1.709536  |
| H | -1.761875 | 4.305767  | 2.487675  |
| H | -1.029002 | 5.854126  | 1.931805  |
| C | -0.010769 | 3.893777  | 0.377000  |
| H | 0.078817  | 3.086119  | 1.131003  |
| H | 0.336839  | 3.503777  | -0.602072 |
| H | 0.680959  | 4.714858  | 0.665652  |
| H | -1.442087 | 2.107248  | 2.474888  |
| C | -3.796797 | 1.847411  | 2.651027  |
| O | -4.650270 | 2.257693  | 3.357641  |
| P | -2.612406 | 2.934806  | 0.028299  |
| O | -3.361406 | -0.230781 | 0.199014  |
| C | -4.453848 | -0.986582 | 0.528894  |
| C | -4.942960 | -1.656099 | -0.807007 |
| H | -4.422572 | -2.650945 | -0.907942 |
| H | -6.037270 | -1.862055 | -0.783181 |
| O | -4.621570 | -0.798296 | -1.879855 |
| H | -3.855752 | -0.314686 | -1.438788 |
| H | -2.521909 | -1.220527 | 2.220930  |
| N | -4.142767 | -2.021496 | 1.568473  |
| H | -3.813128 | -2.861593 | 1.069927  |
| C | -5.285263 | -2.381786 | 2.431019  |
| H | -6.244869 | -2.418916 | 1.855682  |
| H | -5.126823 | -3.413401 | 2.816732  |
| C | -5.437391 | -1.416019 | 3.611965  |
| H | -4.559828 | -1.540872 | 4.283440  |
| H | -5.389300 | -0.371093 | 3.236294  |
| C | -6.726610 | -1.608955 | 4.417796  |
| H | -7.606259 | -1.454584 | 3.750599  |
| H | -6.797902 | -2.664850 | 4.770010  |
| C | -6.826530 | -0.659524 | 5.620456  |
| H | -6.723187 | 0.391313  | 5.264548  |
| H | -5.955354 | -0.830946 | 6.295088  |

|   |           |           |          |
|---|-----------|-----------|----------|
| C | -8.126912 | -0.804669 | 6.424264 |
| H | -8.994840 | -0.628972 | 5.748076 |
| H | -8.227427 | -1.858885 | 6.771272 |
| C | -8.207358 | 0.145683  | 7.625609 |
| H | -8.141602 | 1.206929  | 7.302646 |
| H | -9.156946 | 0.023545  | 8.187468 |
| H | -7.371553 | -0.032924 | 8.336136 |
| H | -5.286642 | -0.367325 | 0.960677 |

91

TS-HI SCF Done: -2039.67297640 A.U.

Number of imaginary frequencies = 1

Imaginary frequency = -106.41 cm<sup>-1</sup>

|    |           |           |           |
|----|-----------|-----------|-----------|
| C  | -0.835960 | 0.879147  | -0.867376 |
| H  | -1.562067 | 2.444812  | -2.202564 |
| N  | -1.851394 | -0.583669 | 2.729288  |
| C  | -0.439528 | -0.813070 | 2.407165  |
| C  | -0.117490 | -0.422929 | 0.987705  |
| N  | -0.976469 | 0.469766  | 0.426651  |
| C  | -1.939287 | 1.745983  | -1.427677 |
| H  | -0.136528 | -1.874902 | 2.576630  |
| H  | 0.227687  | -0.203210 | 3.076365  |
| H  | -2.675657 | 1.074205  | -1.924712 |
| C  | 0.980229  | -0.910064 | 0.258232  |
| H  | 1.663852  | -1.635696 | 0.723231  |
| C  | 1.176178  | -0.462223 | -1.056056 |
| H  | 2.032963  | -0.825520 | -1.644752 |
| C  | 0.255353  | 0.433572  | -1.629298 |
| H  | 0.364853  | 0.770883  | -2.670481 |
| Ru | -2.595482 | 1.055280  | 1.649182  |
| C  | -2.109238 | -0.784556 | 4.153316  |
| H  | -1.499095 | -0.087219 | 4.783192  |
| H  | -3.168397 | -0.515283 | 4.348074  |
| C  | -1.876876 | -2.214739 | 4.632362  |
| C  | -2.254865 | -3.317108 | 3.831305  |
| C  | -1.310324 | -2.465669 | 5.899089  |
| C  | -2.074378 | -4.631122 | 4.295428  |
| C  | -1.134281 | -3.780091 | 6.367186  |
| C  | -1.516008 | -4.869454 | 5.564711  |
| H  | -2.703864 | -3.146468 | 2.838901  |
| H  | -1.001592 | -1.613794 | 6.528715  |
| H  | -2.377677 | -5.477684 | 3.658087  |
| H  | -0.690788 | -3.953784 | 7.361091  |
| H  | -1.375645 | -5.900974 | 5.925905  |
| H  | -1.772493 | 2.122477  | 2.442591  |
| C  | -4.019070 | 1.606081  | 2.679961  |
| O  | -4.931768 | 2.005132  | 3.313616  |
| P  | -2.901555 | 2.587132  | -0.042492 |
| O  | -3.020027 | -1.598074 | 0.653913  |
| C  | -4.415407 | -1.834848 | 0.469071  |
| C  | -4.549380 | -2.056331 | -1.054874 |



|   |           |           |           |
|---|-----------|-----------|-----------|
| H | -4.289721 | -3.126586 | -1.273192 |
| H | -5.599305 | -1.889087 | -1.379459 |
| O | -3.691811 | -1.173493 | -1.763670 |
| H | -2.931067 | -1.098800 | -1.132386 |
| H | -2.710604 | -1.368055 | 1.631045  |
| N | -4.932100 | -2.933559 | 1.247500  |
| H | -5.105839 | -3.773925 | 0.687529  |
| C | -6.006871 | -2.631220 | 2.194099  |
| H | -6.866809 | -2.090545 | 1.713918  |
| H | -6.418897 | -3.595793 | 2.562988  |
| C | -5.496516 | -1.807840 | 3.381944  |
| H | -4.709614 | -2.394787 | 3.901003  |
| H | -4.990991 | -0.895585 | 2.993497  |
| C | -6.577073 | -1.383476 | 4.380680  |
| H | -7.353861 | -0.776645 | 3.859948  |
| H | -7.105528 | -2.285436 | 4.769614  |
| C | -6.003861 | -0.575782 | 5.554459  |
| H | -5.490125 | 0.325935  | 5.152101  |
| H | -5.214091 | -1.178351 | 6.060972  |
| C | -7.053447 | -0.139785 | 6.586625  |
| H | -7.841113 | 0.458150  | 6.073430  |
| H | -7.573391 | -1.040509 | 6.987189  |
| C | -6.460209 | 0.674068  | 7.743576  |
| H | -5.964296 | 1.595803  | 7.370335  |
| H | -7.236295 | 0.981908  | 8.475364  |
| H | -5.692822 | 0.088259  | 8.294416  |
| H | -4.977146 | -0.912147 | 0.750492  |
| C | -1.965513 | 4.260907  | 0.182905  |
| C | -4.633506 | 2.885600  | -0.819558 |
| C | -5.384487 | 1.541274  | -0.690361 |
| H | -4.846635 | 0.708174  | -1.187518 |
| H | -5.538711 | 1.267705  | 0.372841  |
| H | -6.384929 | 1.637259  | -1.166918 |
| C | -5.384458 | 3.949360  | 0.007566  |
| H | -4.971891 | 4.968414  | -0.132119 |
| H | -6.447235 | 3.978123  | -0.317929 |
| H | -5.375412 | 3.708025  | 1.090596  |
| C | -4.588544 | 3.286302  | -2.309284 |
| H | -4.132277 | 2.495922  | -2.939164 |
| H | -5.628996 | 3.427366  | -2.676460 |
| H | -4.046179 | 4.232588  | -2.490745 |
| C | -2.122619 | 5.236385  | -0.998482 |
| H | -1.472870 | 6.123679  | -0.830866 |
| H | -1.812765 | 4.784802  | -1.964205 |
| H | -3.160128 | 5.609530  | -1.105192 |
| C | -2.448443 | 4.924809  | 1.491527  |
| H | -3.504251 | 5.251486  | 1.440456  |
| H | -2.347036 | 4.233394  | 2.352008  |
| H | -1.830341 | 5.826147  | 1.696453  |
| C | -0.466719 | 3.908554  | 0.339606  |
| H | -0.300581 | 3.168543  | 1.148135  |

|   |           |          |           |
|---|-----------|----------|-----------|
| H | -0.022873 | 3.507537 | -0.594634 |
| H | 0.096412  | 4.831056 | 0.599820  |

91

I SCF Done: -2039.68403442 A.U.

Number of imaginary frequencies = 0

|    |           |           |           |
|----|-----------|-----------|-----------|
| C  | -0.821697 | 0.236893  | -1.032279 |
| H  | -1.211542 | 1.413965  | -2.827589 |
| N  | -2.298493 | 0.019334  | 2.702164  |
| C  | -0.911387 | -0.460223 | 2.597714  |
| C  | -0.458492 | -0.563509 | 1.168286  |
| N  | -1.136788 | 0.224692  | 0.292980  |
| C  | -1.736663 | 1.027315  | -1.930329 |
| H  | -0.767236 | -1.442141 | 3.107975  |
| H  | -0.209868 | 0.247886  | 3.114457  |
| H  | -2.516845 | 0.316266  | -2.283370 |
| C  | 0.600573  | -1.375915 | 0.730445  |
| H  | 1.125114  | -2.020502 | 1.451172  |
| C  | 0.971809  | -1.337954 | -0.621269 |
| H  | 1.805774  | -1.957388 | -0.986254 |
| C  | 0.256152  | -0.520860 | -1.511702 |
| H  | 0.502567  | -0.497205 | -2.583113 |
| Ru | -2.741586 | 1.358412  | 1.118082  |
| C  | -2.606299 | 0.372244  | 4.096032  |
| H  | -1.982692 | 1.236868  | 4.432739  |
| H  | -3.657298 | 0.731158  | 4.127912  |
| C  | -2.453269 | -0.763234 | 5.103709  |
| C  | -2.832380 | -2.087824 | 4.787303  |
| C  | -1.964729 | -0.497335 | 6.399915  |
| C  | -2.716307 | -3.112701 | 5.740902  |
| C  | -1.866093 | -1.517838 | 7.362212  |
| C  | -2.238400 | -2.833037 | 7.033850  |
| H  | -3.232208 | -2.319180 | 3.788291  |
| H  | -1.658951 | 0.530320  | 6.659737  |
| H  | -3.013574 | -4.139267 | 5.473374  |
| H  | -1.488759 | -1.285295 | 8.371084  |
| H  | -2.157394 | -3.636938 | 7.782513  |
| H  | -1.754540 | 2.456409  | 1.659870  |
| C  | -4.100074 | 2.389094  | 1.820355  |
| O  | -4.960079 | 3.074198  | 2.244618  |
| P  | -2.666433 | 2.351855  | -0.962017 |
| O  | -3.634323 | -1.925112 | 1.573838  |
| C  | -4.364911 | -1.346980 | 0.515908  |
| C  | -3.966115 | -2.093794 | -0.772148 |
| H  | -4.472911 | -3.094760 | -0.755764 |
| H  | -4.345905 | -1.552175 | -1.663619 |
| O  | -2.559425 | -2.211661 | -0.870978 |
| H  | -2.292890 | -2.359514 | 0.067930  |
| H  | -3.154904 | -1.148732 | 2.117399  |
| N  | -5.802358 | -1.325483 | 0.632910  |
| H  | -6.138757 | -2.269191 | 0.860633  |

|   |           |           |           |
|---|-----------|-----------|-----------|
| C | -6.443638 | -0.311045 | 1.470335  |
| H | -6.196799 | 0.687403  | 1.047247  |
| H | -7.542839 | -0.430125 | 1.339501  |
| C | -6.106448 | -0.298727 | 2.970620  |
| H | -5.037719 | -0.028397 | 3.090586  |
| H | -6.682076 | 0.527927  | 3.445611  |
| C | -6.371576 | -1.617390 | 3.704009  |
| H | -7.406533 | -1.973542 | 3.485265  |
| H | -5.682785 | -2.391090 | 3.296093  |
| C | -6.176205 | -1.506799 | 5.222436  |
| H | -6.915356 | -0.784562 | 5.641011  |
| H | -5.175639 | -1.064655 | 5.427541  |
| C | -6.283218 | -2.842313 | 5.969390  |
| H | -7.293518 | -3.282344 | 5.802599  |
| H | -5.562047 | -3.561059 | 5.518484  |
| C | -6.002634 | -2.714448 | 7.471124  |
| H | -6.712734 | -2.010193 | 7.956325  |
| H | -6.088068 | -3.690483 | 7.993673  |
| H | -4.975576 | -2.327825 | 7.644867  |
| H | -4.047517 | -0.254915 | 0.373360  |
| C | -1.507623 | 3.891574  | -1.081810 |
| C | -4.247626 | 2.616003  | -2.025061 |
| C | -5.180834 | 1.430085  | -1.703393 |
| H | -6.111862 | 1.519084  | -2.303840 |
| H | -4.725417 | 0.450055  | -1.949236 |
| H | -5.465200 | 1.406343  | -0.634908 |
| C | -1.418759 | 4.518394  | -2.485780 |
| H | -1.116062 | 3.782826  | -3.260077 |
| H | -2.370803 | 4.988402  | -2.801958 |
| H | -0.647748 | 5.320124  | -2.479270 |
| C | -3.991364 | 2.636400  | -3.546987 |
| H | -3.343008 | 3.470341  | -3.870226 |
| H | -3.543432 | 1.688227  | -3.908501 |
| H | -4.963939 | 2.752913  | -4.073827 |
| C | -1.989928 | 4.945676  | -0.060320 |
| H | -2.988325 | 5.354201  | -0.308197 |
| H | -2.041215 | 4.519967  | 0.961624  |
| H | -1.274867 | 5.796970  | -0.045955 |
| C | -4.938099 | 3.918766  | -1.570501 |
| H | -5.944622 | 3.983327  | -2.038219 |
| H | -5.078988 | 3.945196  | -0.470017 |
| H | -4.376401 | 4.823921  | -1.876022 |
| C | -0.095492 | 3.413818  | -0.665833 |
| H | -0.106034 | 2.903878  | 0.318372  |
| H | 0.356572  | 2.725161  | -1.408844 |
| H | 0.575213  | 4.296710  | -0.585925 |

91

TS-IJ SCF Done: -2039.67830554 A.U.

Number of imaginary frequencies = 1

Imaginary frequency = 290.65  $\text{cm}^{-1}$

|    |           |           |           |
|----|-----------|-----------|-----------|
| C  | -0.900062 | -0.001155 | -0.990203 |
| H  | -1.292910 | 0.984694  | -2.897384 |
| N  | -2.154128 | 0.332262  | 2.824146  |
| C  | -0.760054 | -0.158042 | 2.698954  |
| C  | -0.445047 | -0.523778 | 1.270460  |
| N  | -1.123483 | 0.191869  | 0.337467  |
| C  | -1.796049 | 0.759848  | -1.934471 |
| H  | -0.557434 | -1.013212 | 3.381768  |
| H  | -0.084856 | 0.677039  | 2.997591  |
| H  | -2.662627 | 0.101203  | -2.163509 |
| C  | 0.509257  | -1.480055 | 0.895807  |
| H  | 1.033111  | -2.061781 | 1.668784  |
| C  | 0.784603  | -1.663871 | -0.468923 |
| H  | 1.536997  | -2.400386 | -0.790413 |
| C  | 0.077758  | -0.911957 | -1.419447 |
| H  | 0.253908  | -1.050478 | -2.496242 |
| Ru | -2.585087 | 1.524761  | 1.060784  |
| C  | -2.438401 | 0.888848  | 4.165706  |
| H  | -1.792313 | 1.778196  | 4.319668  |
| H  | -3.482540 | 1.265113  | 4.135890  |
| C  | -2.281358 | -0.105023 | 5.308038  |
| C  | -2.764854 | -1.428715 | 5.189553  |
| C  | -1.682800 | 0.290663  | 6.522237  |
| C  | -2.653306 | -2.326776 | 6.264726  |
| C  | -1.580028 | -0.604813 | 7.601354  |
| C  | -2.065806 | -1.918354 | 7.475429  |
| H  | -3.239384 | -1.761339 | 4.252061  |
| H  | -1.294922 | 1.318094  | 6.624698  |
| H  | -3.042158 | -3.351775 | 6.156180  |
| H  | -1.113435 | -0.275675 | 8.543665  |
| H  | -1.984975 | -2.623034 | 8.318300  |
| H  | -1.377091 | 2.542248  | 1.553359  |
| C  | -3.804215 | 2.757375  | 1.688542  |
| O  | -4.563182 | 3.578987  | 2.069227  |
| P  | -2.537267 | 2.271717  | -1.080890 |
| O  | -3.762348 | -1.648218 | 2.038931  |
| C  | -4.409624 | -1.234102 | 1.011861  |
| C  | -4.024389 | -1.947371 | -0.311032 |
| H  | -4.728703 | -2.814274 | -0.425361 |
| H  | -4.172339 | -1.280075 | -1.189077 |
| O  | -2.685009 | -2.359102 | -0.233053 |
| H  | -2.540296 | -2.374244 | 0.749940  |
| H  | -2.805065 | -0.487166 | 2.638581  |
| N  | -5.745938 | -0.848379 | 1.081740  |
| H  | -6.118216 | -0.637533 | 0.149879  |
| C  | -6.243307 | 0.105531  | 2.077119  |
| H  | -5.771856 | 1.104257  | 1.901186  |
| H  | -7.332508 | 0.214250  | 1.884156  |
| C  | -6.023241 | -0.285803 | 3.542251  |
| H  | -4.956143 | -0.141102 | 3.800974  |
| H  | -6.588188 | 0.446975  | 4.161988  |

|   |           |           |           |
|---|-----------|-----------|-----------|
| C | -6.416947 | -1.717659 | 3.919457  |
| H | -7.446256 | -1.946710 | 3.558946  |
| H | -5.736300 | -2.409529 | 3.376768  |
| C | -6.318374 | -1.966548 | 5.432549  |
| H | -7.135704 | -1.420174 | 5.958631  |
| H | -5.371717 | -1.520667 | 5.812752  |
| C | -6.350373 | -3.448532 | 5.830127  |
| H | -7.290412 | -3.916623 | 5.457645  |
| H | -5.524680 | -3.977395 | 5.300082  |
| C | -6.216649 | -3.668862 | 7.342155  |
| H | -7.047232 | -3.180061 | 7.895713  |
| H | -6.224684 | -4.746696 | 7.608437  |
| H | -5.268060 | -3.231985 | 7.723080  |
| H | -3.720049 | 0.231928  | 0.658086  |
| C | -1.261734 | 3.671715  | -1.468859 |
| C | -4.168643 | 2.576551  | -2.061059 |
| C | -5.208878 | 1.569094  | -1.523867 |
| H | -6.168369 | 1.712346  | -2.067885 |
| H | -4.885961 | 0.519619  | -1.681153 |
| H | -5.383781 | 1.705501  | -0.439877 |
| C | -1.227878 | 4.123769  | -2.940410 |
| H | -1.045771 | 3.280442  | -3.639476 |
| H | -2.158329 | 4.640070  | -3.249289 |
| H | -0.394523 | 4.847199  | -3.080564 |
| C | -4.029498 | 2.367004  | -3.584274 |
| H | -3.308888 | 3.059593  | -4.055002 |
| H | -3.727389 | 1.329946  | -3.837624 |
| H | -5.016577 | 2.541819  | -4.066569 |
| C | -1.562281 | 4.870567  | -0.542728 |
| H | -2.528136 | 5.359034  | -0.774411 |
| H | -1.583099 | 4.548799  | 0.518142  |
| H | -0.764172 | 5.635592  | -0.662190 |
| C | -4.675785 | 4.001320  | -1.752296 |
| H | -5.699290 | 4.125022  | -2.169084 |
| H | -4.734445 | 4.187794  | -0.660136 |
| H | -4.039906 | 4.784682  | -2.209844 |
| C | 0.127456  | 3.104539  | -1.091065 |
| H | 0.129726  | 2.706138  | -0.055895 |
| H | 0.463933  | 2.304337  | -1.782110 |
| H | 0.878229  | 3.922584  | -1.146472 |

91

J SCF Done: -2039.69004171 A.U.

Number of imaginary frequencies = 0

|   |           |           |           |
|---|-----------|-----------|-----------|
| C | -0.956296 | 0.007850  | -1.005777 |
| H | -1.328707 | 0.960259  | -2.933804 |
| N | -2.162472 | 0.455672  | 2.807489  |
| C | -0.768338 | -0.035699 | 2.679550  |
| C | -0.496132 | -0.473184 | 1.263468  |
| N | -1.151383 | 0.252196  | 0.318889  |
| C | -1.825911 | 0.788804  | -1.956781 |

|    |           |           |           |
|----|-----------|-----------|-----------|
| H  | -0.538165 | -0.850685 | 3.401207  |
| H  | -0.101291 | 0.828864  | 2.905955  |
| H  | -2.730474 | 0.169957  | -2.149842 |
| C  | 0.397192  | -1.492327 | 0.906011  |
| H  | 0.901555  | -2.076679 | 1.690070  |
| C  | 0.641210  | -1.733192 | -0.456951 |
| H  | 1.346143  | -2.520027 | -0.766278 |
| C  | -0.037608 | -0.969931 | -1.419175 |
| H  | 0.113565  | -1.149863 | -2.493721 |
| Ru | -2.533172 | 1.675993  | 1.018958  |
| C  | -2.445825 | 1.058460  | 4.125886  |
| H  | -1.830113 | 1.977318  | 4.218702  |
| H  | -3.502816 | 1.399705  | 4.095520  |
| C  | -2.236986 | 0.139902  | 5.322555  |
| C  | -2.561292 | -1.235041 | 5.265086  |
| C  | -1.751181 | 0.666891  | 6.537515  |
| C  | -2.409396 | -2.053794 | 6.397667  |
| C  | -1.606589 | -0.148984 | 7.672958  |
| C  | -1.936088 | -1.514269 | 7.606807  |
| H  | -2.940567 | -1.675684 | 4.328994  |
| H  | -1.484857 | 1.735655  | 6.594014  |
| H  | -2.668112 | -3.122917 | 6.333331  |
| H  | -1.228749 | 0.283589  | 8.613212  |
| H  | -1.820276 | -2.156831 | 8.494009  |
| H  | -1.239552 | 2.628698  | 1.572560  |
| C  | -3.744543 | 2.924526  | 1.624754  |
| O  | -4.536804 | 3.722252  | 1.993429  |
| P  | -2.483335 | 2.357801  | -1.133256 |
| O  | -3.718203 | -1.734680 | 2.080398  |
| C  | -4.505168 | -1.499103 | 1.134690  |
| C  | -4.152032 | -2.081133 | -0.245719 |
| H  | -4.823538 | -2.962013 | -0.425769 |
| H  | -4.379658 | -1.324084 | -1.031625 |
| O  | -2.796702 | -2.436985 | -0.279938 |
| H  | -2.520567 | -2.378186 | 0.668692  |
| H  | -2.805282 | -0.351415 | 2.649047  |
| N  | -5.719277 | -0.908489 | 1.261344  |
| H  | -6.165331 | -0.692515 | 0.365647  |
| C  | -6.099254 | 0.009129  | 2.346595  |
| H  | -5.515978 | 0.952166  | 2.218583  |
| H  | -7.170019 | 0.250322  | 2.178774  |
| C  | -5.911277 | -0.528006 | 3.769992  |
| H  | -4.835982 | -0.525797 | 4.029828  |
| H  | -6.391410 | 0.205573  | 4.455748  |
| C  | -6.469858 | -1.931922 | 4.025190  |
| H  | -7.545165 | -1.978507 | 3.734316  |
| H  | -5.938143 | -2.650150 | 3.362447  |
| C  | -6.301264 | -2.372619 | 5.486095  |
| H  | -6.870924 | -1.682825 | 6.151612  |
| H  | -5.233903 | -2.249677 | 5.779836  |
| C  | -6.736138 | -3.819453 | 5.758263  |

|   |           |           |           |
|---|-----------|-----------|-----------|
| H | -7.806546 | -3.943826 | 5.474781  |
| H | -6.167870 | -4.501611 | 5.085007  |
| C | -6.531696 | -4.245677 | 7.217537  |
| H | -7.117747 | -3.604011 | 7.910259  |
| H | -6.842098 | -5.297289 | 7.390588  |
| H | -5.464253 | -4.155848 | 7.514177  |
| H | -3.704950 | 0.564858  | 0.558299  |
| C | -1.159697 | 3.694816  | -1.587788 |
| C | -4.117911 | 2.692674  | -2.103251 |
| C | -5.198498 | 1.734831  | -1.551224 |
| H | -6.146125 | 1.904414  | -2.109301 |
| H | -4.913966 | 0.669753  | -1.681383 |
| H | -5.375418 | 1.898545  | -0.471522 |
| C | -1.123373 | 4.107516  | -3.070070 |
| H | -0.984937 | 3.239570  | -3.748973 |
| H | -2.034706 | 4.655219  | -3.382684 |
| H | -0.261875 | 4.791351  | -3.237775 |
| C | -3.995448 | 2.452578  | -3.624077 |
| H | -3.249290 | 3.106296  | -4.109763 |
| H | -3.737767 | 1.399850  | -3.861531 |
| H | -4.976847 | 2.660458  | -4.105143 |
| C | -1.399845 | 4.925658  | -0.686812 |
| H | -2.340335 | 5.456577  | -0.930788 |
| H | -1.437534 | 4.621943  | 0.379466  |
| H | -0.564535 | 5.647800  | -0.819626 |
| C | -4.569859 | 4.141204  | -1.819121 |
| H | -5.591958 | 4.296161  | -2.229319 |
| H | -4.609554 | 4.351056  | -0.730467 |
| H | -3.908727 | 4.890291  | -2.297971 |
| C | 0.206531  | 3.076900  | -1.206551 |
| H | 0.195726  | 2.706731  | -0.160359 |
| H | 0.501067  | 2.245669  | -1.880266 |
| H | 0.992458  | 3.859157  | -1.287541 |

28

hydroxyacetamide SCF Done: -520.543001097 A.U.

Number of imaginary frequencies = 0

|   |           |           |          |
|---|-----------|-----------|----------|
| O | -2.210081 | -1.371556 | 5.287048 |
| C | -3.612169 | -1.168315 | 5.148268 |
| C | -4.056702 | -1.345920 | 3.687946 |
| O | -5.251868 | -1.367694 | 3.393073 |
| H | -1.928275 | -1.018826 | 6.149466 |
| H | -4.217250 | -1.887915 | 5.750421 |
| H | -3.933625 | -0.141870 | 5.449992 |
| N | -3.024540 | -1.433167 | 2.797431 |
| H | -2.083860 | -1.474248 | 3.201639 |
| C | -3.233083 | -1.690636 | 1.382598 |
| H | -4.268605 | -1.364237 | 1.150728 |
| H | -2.540236 | -1.053705 | 0.788191 |
| C | -3.055814 | -3.169353 | 0.998322 |
| H | -3.769803 | -3.774806 | 1.599532 |

|   |           |           |           |
|---|-----------|-----------|-----------|
| H | -2.035786 | -3.508348 | 1.292764  |
| C | -3.277016 | -3.429602 | -0.497599 |
| H | -4.295811 | -3.080443 | -0.784261 |
| H | -2.569055 | -2.806181 | -1.092362 |
| C | -3.113546 | -4.902804 | -0.897267 |
| H | -3.821125 | -5.525559 | -0.302187 |
| H | -2.094611 | -5.252338 | -0.609228 |
| C | -3.337400 | -5.168707 | -2.393559 |
| H | -4.355716 | -4.817348 | -2.677485 |
| H | -2.630132 | -4.543168 | -2.985085 |
| C | -3.172224 | -6.643394 | -2.781211 |
| H | -3.339402 | -6.806321 | -3.866296 |
| H | -2.151519 | -7.011226 | -2.540268 |
| H | -3.891744 | -7.287091 | -2.230798 |

89

K SCF Done: -2038.48406087 A.U.

Number of imaginary frequencies = 0

|    |           |           |           |
|----|-----------|-----------|-----------|
| C  | -2.514881 | -0.400324 | -0.586321 |
| H  | -2.750739 | 1.172609  | -2.078207 |
| N  | -2.123311 | -0.587905 | 3.393870  |
| C  | -1.477529 | -1.715986 | 2.714434  |
| C  | -1.814514 | -1.735861 | 1.249034  |
| N  | -2.207484 | -0.537896 | 0.736628  |
| C  | -3.016880 | 0.956104  | -1.022908 |
| H  | -1.747540 | -2.695225 | 3.177048  |
| H  | -0.358034 | -1.650799 | 2.792296  |
| H  | -4.128336 | 0.944536  | -0.969201 |
| C  | -1.707173 | -2.867282 | 0.421863  |
| H  | -1.398854 | -3.829417 | 0.856912  |
| C  | -1.991312 | -2.741354 | -0.944547 |
| H  | -1.905734 | -3.611969 | -1.613334 |
| C  | -2.399474 | -1.494855 | -1.455569 |
| H  | -2.642742 | -1.371349 | -2.521330 |
| Ru | -2.277719 | 1.073090  | 2.122815  |
| C  | -1.649450 | -0.440127 | 4.786138  |
| H  | -0.568511 | -0.155580 | 4.803963  |
| H  | -2.230902 | 0.390166  | 5.230848  |
| C  | -1.855062 | -1.698922 | 5.614378  |
| C  | -3.163396 | -2.100764 | 5.967733  |
| C  | -0.767710 | -2.510695 | 5.998390  |
| C  | -3.370251 | -3.287870 | 6.688951  |
| C  | -0.973226 | -3.698682 | 6.723570  |
| C  | -2.277999 | -4.090834 | 7.069619  |
| H  | -4.011029 | -1.467786 | 5.661541  |
| H  | 0.256110  | -2.203791 | 5.723586  |
| H  | -4.395166 | -3.589313 | 6.960259  |
| H  | -0.111752 | -4.319842 | 7.018689  |
| H  | -2.444169 | -5.020894 | 7.637184  |
| C  | -0.809329 | 2.922456  | -0.568275 |
| C  | -3.845631 | 3.636816  | -0.031744 |



|   |            |           |           |
|---|------------|-----------|-----------|
| C | -5.061213  | 3.117133  | 0.765450  |
| H | -5.900725  | 3.840417  | 0.671269  |
| H | -5.426844  | 2.140317  | 0.383240  |
| H | -4.830630  | 2.995164  | 1.842129  |
| C | -4.282497  | 3.881999  | -1.491284 |
| H | -3.473558  | 4.287808  | -2.124965 |
| H | -4.671095  | 2.962342  | -1.975235 |
| H | -5.110794  | 4.624669  | -1.501729 |
| C | -3.364742  | 4.950475  | 0.619257  |
| H | -4.214563  | 5.665299  | 0.678008  |
| H | -2.994499  | 4.784597  | 1.652015  |
| H | -2.564202  | 5.442706  | 0.031980  |
| C | -0.954017  | 3.699129  | -1.889576 |
| H | 0.056735   | 3.908524  | -2.304283 |
| H | -1.509306  | 3.125161  | -2.660794 |
| H | -1.455916  | 4.677208  | -1.752238 |
| C | -0.092458  | 3.795300  | 0.485358  |
| H | -0.637678  | 4.733572  | 0.703243  |
| H | 0.034541   | 3.247092  | 1.440122  |
| H | 0.915590   | 4.074336  | 0.108074  |
| C | 0.047982   | 1.659959  | -0.826431 |
| H | 0.133116   | 1.029138  | 0.081299  |
| H | -0.353059  | 1.033105  | -1.649352 |
| H | 1.072904   | 1.972622  | -1.122435 |
| H | -0.719187  | 1.281231  | 2.053522  |
| C | -2.322693  | 2.500348  | 3.294861  |
| O | -2.346129  | 3.446596  | 3.995056  |
| P | -2.475611  | 2.302264  | 0.188982  |
| O | -4.659341  | -1.221409 | 3.160212  |
| C | -5.172657  | 0.010246  | 2.835318  |
| C | -5.360511  | 0.938632  | 4.059923  |
| O | -4.664397  | 0.799569  | 5.066685  |
| H | -3.651452  | -1.033471 | 3.388608  |
| H | -4.479073  | 0.625867  | 2.141878  |
| H | -6.100678  | -0.098258 | 2.230873  |
| N | -6.249168  | 1.988128  | 3.945980  |
| H | -6.289984  | 2.551153  | 4.803207  |
| C | -7.393049  | 2.080308  | 3.043992  |
| H | -7.665183  | 3.153889  | 2.945676  |
| H | -7.085913  | 1.763023  | 2.027362  |
| C | -8.613730  | 1.263040  | 3.498572  |
| H | -8.914200  | 1.594443  | 4.518366  |
| H | -8.307803  | 0.197516  | 3.603588  |
| C | -9.803983  | 1.375686  | 2.537212  |
| H | -10.092743 | 2.447053  | 2.426780  |
| H | -9.488598  | 1.045448  | 1.519818  |
| C | -11.029763 | 0.562090  | 2.976322  |
| H | -11.346058 | 0.893176  | 3.992664  |
| H | -10.739353 | -0.508094 | 3.088954  |
| C | -12.221576 | 0.667828  | 2.012974  |
| H | -12.506676 | 1.739145  | 1.901385  |

|   |            |           |          |
|---|------------|-----------|----------|
| H | -11.900805 | 0.336845  | 0.998584 |
| C | -13.440339 | -0.147930 | 2.461947 |
| H | -14.285169 | -0.053973 | 1.748380 |
| H | -13.192305 | -1.227705 | 2.548043 |
| H | -13.803617 | 0.186104  | 3.457625 |

89

TS-KL SCF Done: -2038.47724781 A.U.

Number of imaginary frequencies = 1

Imaginary frequency = -740.82 cm<sup>-1</sup>

|    |           |           |           |
|----|-----------|-----------|-----------|
| C  | -2.760369 | -0.328649 | -0.569083 |
| H  | -2.934462 | 1.257631  | -2.054866 |
| N  | -2.253517 | -0.575916 | 3.392459  |
| C  | -1.664922 | -1.721337 | 2.679586  |
| C  | -2.085266 | -1.715963 | 1.234474  |
| N  | -2.405181 | -0.491073 | 0.737613  |
| C  | -3.166728 | 1.064407  | -0.987093 |
| H  | -1.938139 | -2.691435 | 3.155926  |
| H  | -0.546977 | -1.663775 | 2.707027  |
| H  | -4.271046 | 1.148389  | -0.879218 |
| C  | -2.108227 | -2.852454 | 0.408991  |
| H  | -1.858753 | -3.836289 | 0.832822  |
| C  | -2.445410 | -2.704232 | -0.943773 |
| H  | -2.462259 | -3.579121 | -1.612187 |
| C  | -2.773298 | -1.429294 | -1.439499 |
| H  | -3.053618 | -1.285689 | -2.493558 |
| Ru | -2.300267 | 1.106542  | 2.108916  |
| C  | -1.732591 | -0.441163 | 4.773702  |
| H  | -0.643159 | -0.208660 | 4.746887  |
| H  | -2.263727 | 0.422599  | 5.217475  |
| C  | -1.985200 | -1.678733 | 5.617714  |
| C  | -3.311895 | -2.031092 | 5.956533  |
| C  | -0.929207 | -2.512819 | 6.038244  |
| C  | -3.566888 | -3.193646 | 6.701399  |
| C  | -1.183802 | -3.675492 | 6.788647  |
| C  | -2.505681 | -4.018743 | 7.121096  |
| H  | -4.134955 | -1.384718 | 5.611852  |
| H  | 0.108048  | -2.244400 | 5.774165  |
| H  | -4.604958 | -3.458719 | 6.960076  |
| H  | -0.347152 | -4.315297 | 7.113552  |
| H  | -2.709780 | -4.929129 | 7.707785  |
| C  | -0.777327 | 2.833734  | -0.630822 |
| C  | -3.716937 | 3.800820  | 0.042635  |
| C  | -4.939421 | 3.381204  | 0.888033  |
| H  | -5.722331 | 4.167843  | 0.818370  |
| H  | -5.393517 | 2.434679  | 0.525523  |
| H  | -4.684800 | 3.244188  | 1.956945  |
| C  | -4.192094 | 4.088893  | -1.397473 |
| H  | -3.378521 | 4.424877  | -2.065200 |
| H  | -4.680201 | 3.208707  | -1.864224 |
| H  | -4.951716 | 4.901185  | -1.371959 |

|   |            |           |           |
|---|------------|-----------|-----------|
| C | -3.098363  | 5.066892  | 0.671769  |
| H | -3.881349  | 5.850620  | 0.767373  |
| H | -2.698246  | 4.867904  | 1.687308  |
| H | -2.285259  | 5.491262  | 0.049491  |
| C | -0.909367  | 3.629101  | -1.942367 |
| H | 0.097795   | 3.754114  | -2.397671 |
| H | -1.543077  | 3.110020  | -2.691823 |
| H | -1.319432  | 4.645605  | -1.781017 |
| C | 0.054236   | 3.633154  | 0.396687  |
| H | -0.396291  | 4.615249  | 0.637664  |
| H | 0.166756   | 3.068117  | 1.343469  |
| H | 1.068004   | 3.823420  | -0.018506 |
| C | -0.044754  | 1.503257  | -0.927572 |
| H | 0.020618   | 0.863472  | -0.024428 |
| H | -0.532026  | 0.919614  | -1.735676 |
| H | 0.990687   | 1.727695  | -1.264110 |
| H | -0.718506  | 1.124168  | 1.993212  |
| C | -2.143202  | 2.525674  | 3.285474  |
| O | -2.023522  | 3.460258  | 3.988865  |
| P | -2.454832  | 2.356234  | 0.193865  |
| O | -4.706574  | -0.963694 | 3.198031  |
| C | -5.082264  | 0.280545  | 2.857403  |
| C | -5.293937  | 1.223267  | 4.072918  |
| O | -4.574156  | 1.123347  | 5.068434  |
| H | -3.525922  | -0.838117 | 3.416648  |
| H | -4.258684  | 0.893033  | 2.238345  |
| H | -5.925110  | 0.310334  | 2.122408  |
| N | -6.248048  | 2.215711  | 3.980865  |
| H | -6.315950  | 2.762784  | 4.846881  |
| C | -7.413081  | 2.233834  | 3.099801  |
| H | -7.819332  | 3.268527  | 3.099092  |
| H | -7.089621  | 2.043735  | 2.056077  |
| C | -8.510427  | 1.231969  | 3.495910  |
| H | -8.838952  | 1.446004  | 4.538144  |
| H | -8.065028  | 0.211793  | 3.520872  |
| C | -9.715901  | 1.254858  | 2.547579  |
| H | -10.147559 | 2.282639  | 2.517311  |
| H | -9.370311  | 1.045447  | 1.508142  |
| C | -10.815790 | 0.252681  | 2.926104  |
| H | -11.163060 | 0.462311  | 3.964411  |
| H | -10.381703 | -0.773326 | 2.958942  |
| C | -12.021194 | 0.265824  | 1.974060  |
| H | -12.450663 | 1.293489  | 1.942808  |
| H | -11.669298 | 0.057549  | 0.937587  |
| C | -13.112786 | -0.739638 | 2.361335  |
| H | -13.970443 | -0.709207 | 1.657528  |
| H | -12.719150 | -1.778818 | 2.366038  |
| H | -13.507073 | -0.533251 | 3.379618  |

Number of imaginary frequencies = 0

|    |           |           |           |
|----|-----------|-----------|-----------|
| C  | -5.327648 | 2.601295  | 2.877676  |
| H  | -5.020955 | 3.008479  | 4.996111  |
| N  | -4.399607 | -0.314290 | 0.236083  |
| C  | -4.394581 | 1.051220  | -0.345196 |
| C  | -5.039289 | 2.036510  | 0.597235  |
| N  | -4.885294 | 1.744226  | 1.915269  |
| C  | -5.147568 | 2.149955  | 4.304846  |
| H  | -4.876192 | 1.083988  | -1.347361 |
| H  | -3.326627 | 1.349588  | -0.463151 |
| H  | -6.071132 | 1.611145  | 4.612805  |
| C  | -5.675098 | 3.215800  | 0.184285  |
| H  | -5.801626 | 3.421275  | -0.889018 |
| C  | -6.125547 | 4.120779  | 1.159654  |
| H  | -6.618392 | 5.059688  | 0.863812  |
| C  | -5.942281 | 3.812631  | 2.518057  |
| H  | -6.285507 | 4.499919  | 3.305632  |
| Ru | -3.908471 | -0.068543 | 2.365587  |
| C  | -3.577794 | -1.287897 | -0.537309 |
| H  | -2.531413 | -0.919227 | -0.519127 |
| H  | -3.600504 | -2.237881 | 0.029540  |
| C  | -4.079380 | -1.506129 | -1.951553 |
| C  | -5.106672 | -2.442091 | -2.202393 |
| C  | -3.582781 | -0.740079 | -3.028214 |
| C  | -5.634593 | -2.597375 | -3.494844 |
| C  | -4.107914 | -0.894007 | -4.323025 |
| C  | -5.139494 | -1.820591 | -4.557934 |
| H  | -5.494706 | -3.069423 | -1.384750 |
| H  | -2.769508 | -0.017611 | -2.847012 |
| H  | -6.434227 | -3.334570 | -3.669161 |
| H  | -3.707087 | -0.290968 | -5.153491 |
| H  | -5.551871 | -1.943184 | -5.572111 |
| C  | -2.188734 | 1.901103  | 4.781320  |
| C  | -4.289952 | -0.128677 | 6.014304  |
| C  | -5.501127 | -1.007818 | 5.636252  |
| H  | -5.802896 | -1.605021 | 6.524322  |
| H  | -6.380270 | -0.410737 | 5.317078  |
| H  | -5.261112 | -1.697384 | 4.807878  |
| C  | -4.702263 | 0.760774  | 7.208123  |
| H  | -3.873449 | 1.370220  | 7.608381  |
| H  | -5.542219 | 1.440473  | 6.955945  |
| H  | -5.056286 | 0.106959  | 8.035298  |
| C  | -3.118416 | -1.054551 | 6.406773  |
| H  | -3.453008 | -1.756798 | 7.201390  |
| H  | -2.771574 | -1.663554 | 5.546806  |
| H  | -2.252091 | -0.492530 | 6.809444  |
| C  | -2.118436 | 2.540531  | 6.179759  |
| H  | -1.236777 | 3.217366  | 6.225441  |
| H  | -3.013030 | 3.155109  | 6.413758  |
| H  | -1.988738 | 1.788630  | 6.983110  |
| C  | -0.961033 | 0.993933  | 4.547335  |

|   |           |           |          |
|---|-----------|-----------|----------|
| H | -0.896326 | 0.167717  | 5.282074 |
| H | -0.989194 | 0.552150  | 3.531065 |
| H | -0.033506 | 1.599926  | 4.642614 |
| C | -2.175001 | 3.026342  | 3.719547 |
| H | -2.291726 | 2.610908  | 2.697313 |
| H | -2.965800 | 3.785138  | 3.894312 |
| H | -1.197888 | 3.554579  | 3.766165 |
| H | -2.491068 | 0.641662  | 1.796257 |
| C | -2.924481 | -1.574777 | 2.752249 |
| O | -2.256251 | -2.515606 | 3.013901 |
| P | -3.778826 | 0.854556  | 4.435657 |
| O | -7.276337 | -0.660178 | 0.206262 |
| C | -7.800000 | -1.759740 | 0.327350 |
| C | -7.046748 | -3.051161 | 0.648507 |
| O | -7.432350 | -4.075009 | 0.063038 |
| H | -5.390917 | -0.630204 | 0.228474 |
| H | -5.448628 | -0.692838 | 2.748991 |
| H | -8.884117 | -1.938122 | 0.077517 |
| N | -5.981549 | -2.925440 | 1.469931 |
| H | -5.757126 | -1.993528 | 1.921954 |
| C | -5.139058 | -4.052018 | 1.853000 |
| H | -5.544950 | -4.959710 | 1.360527 |
| H | -4.110711 | -3.888637 | 1.456418 |
| C | -5.065113 | -4.205163 | 3.377457 |
| H | -4.803945 | -3.214697 | 3.805467 |
| H | -6.074598 | -4.458512 | 3.771414 |
| C | -4.024493 | -5.226037 | 3.847877 |
| H | -3.046015 | -4.978441 | 3.379809 |
| H | -4.297041 | -6.246526 | 3.492093 |
| C | -3.857006 | -5.230060 | 5.373936 |
| H | -3.590700 | -4.199527 | 5.705784 |
| H | -4.835677 | -5.457878 | 5.857824 |
| C | -2.794411 | -6.214294 | 5.883088 |
| H | -1.822538 | -5.984435 | 5.390139 |
| H | -3.061326 | -7.244906 | 5.554615 |
| C | -2.621656 | -6.184359 | 7.406857 |
| H | -1.846504 | -6.900879 | 7.750334 |
| H | -2.321238 | -5.172778 | 7.756168 |
| H | -3.570343 | -6.442641 | 7.925394 |

26

oxoacetamide SCF Done: -519.324406671 A.U.

Number of imaginary frequencies = 0

|   |           |           |          |
|---|-----------|-----------|----------|
| O | -2.294945 | -1.123816 | 5.407675 |
| C | -3.463919 | -1.016044 | 5.086215 |
| C | -3.978130 | -1.180660 | 3.643256 |
| O | -5.181677 | -1.093732 | 3.394353 |
| H | -4.297252 | -0.792735 | 5.814537 |
| N | -2.974248 | -1.412388 | 2.751246 |
| H | -2.033389 | -1.499774 | 3.152426 |
| C | -3.202503 | -1.681222 | 1.341297 |

|   |           |           |           |
|---|-----------|-----------|-----------|
| H | -4.239196 | -1.350052 | 1.122364  |
| H | -2.515160 | -1.052694 | 0.731678  |
| C | -3.031041 | -3.164407 | 0.971707  |
| H | -3.735641 | -3.766603 | 1.587054  |
| H | -2.006719 | -3.499734 | 1.254630  |
| C | -3.271247 | -3.436175 | -0.519546 |
| H | -4.293641 | -3.089830 | -0.796141 |
| H | -2.570653 | -2.817668 | -1.127500 |
| C | -3.111752 | -4.913054 | -0.907246 |
| H | -3.811849 | -5.530834 | -0.298392 |
| H | -2.089175 | -5.259273 | -0.628759 |
| C | -3.353865 | -5.191240 | -2.398515 |
| H | -4.375745 | -4.842700 | -2.672786 |
| H | -2.654012 | -4.570547 | -3.003655 |
| C | -3.192629 | -6.669171 | -2.775043 |
| H | -3.373034 | -6.840887 | -3.856511 |
| H | -2.168856 | -7.034408 | -2.543751 |
| H | -3.905195 | -7.308391 | -2.210666 |

87

M SCF Done: -2037.27422683 A.U.

Number of imaginary frequencies = 0

|    |           |           |           |
|----|-----------|-----------|-----------|
| C  | -1.908639 | -0.533288 | -1.034325 |
| H  | -2.594313 | 0.885418  | -2.537876 |
| N  | -1.083091 | -0.511821 | 2.853994  |
| C  | -0.254172 | -1.473983 | 2.136627  |
| C  | -0.760359 | -1.637609 | 0.721463  |
| N  | -1.450876 | -0.567121 | 0.248029  |
| C  | -2.630248 | 0.726810  | -1.440790 |
| H  | -0.230726 | -2.471918 | 2.646371  |
| H  | 0.824308  | -1.156718 | 2.055759  |
| H  | -3.701353 | 0.632094  | -1.154834 |
| C  | -0.524714 | -2.756552 | -0.094175 |
| H  | 0.025476  | -3.619064 | 0.310221  |
| C  | -0.996454 | -2.748165 | -1.415461 |
| H  | -0.833062 | -3.617802 | -2.070317 |
| C  | -1.691576 | -1.623323 | -1.893463 |
| H  | -2.072213 | -1.588383 | -2.924696 |
| Ru | -1.479018 | 1.163837  | 1.552480  |
| C  | -0.664789 | -0.355911 | 4.250273  |
| H  | -0.362165 | -1.353423 | 4.658934  |
| H  | 0.229862  | 0.309066  | 4.354733  |
| C  | -1.813791 | 0.173244  | 5.088703  |
| C  | -1.934007 | 1.542195  | 5.394068  |
| C  | -2.849303 | -0.698784 | 5.488139  |
| C  | -3.075880 | 2.038176  | 6.049728  |
| C  | -3.992149 | -0.211476 | 6.144796  |
| C  | -4.111907 | 1.165163  | 6.420079  |
| H  | -1.131317 | 2.234620  | 5.100615  |
| H  | -2.769729 | -1.772558 | 5.256003  |
| H  | -3.155863 | 3.115807  | 6.263641  |

|   |           |           |           |
|---|-----------|-----------|-----------|
| H | -4.796110 | -0.906529 | 6.435174  |
| H | -5.010446 | 1.551459  | 6.927263  |
| C | -0.455391 | 2.794604  | -1.465005 |
| C | -3.424795 | 3.472170  | -0.607154 |
| C | -4.502596 | 3.026032  | 0.404206  |
| H | -5.377822 | 3.707180  | 0.323652  |
| H | -4.867790 | 1.995363  | 0.212010  |
| H | -4.130609 | 3.053277  | 1.445320  |
| C | -4.062881 | 3.533002  | -2.011360 |
| H | -3.359286 | 3.851904  | -2.801029 |
| H | -4.505542 | 2.561431  | -2.312490 |
| H | -4.894704 | 4.271314  | -1.995237 |
| C | -2.907229 | 4.862669  | -0.181981 |
| H | -3.768519 | 5.559004  | -0.084505 |
| H | -2.394424 | 4.826037  | 0.801453  |
| H | -2.213210 | 5.303203  | -0.925239 |
| C | -0.805707 | 3.465481  | -2.806462 |
| H | 0.133563  | 3.679501  | -3.362525 |
| H | -1.426468 | 2.814078  | -3.456651 |
| H | -1.330937 | 4.431560  | -2.674286 |
| C | 0.365020  | 3.762964  | -0.583879 |
| H | -0.192275 | 4.682649  | -0.322829 |
| H | 0.676546  | 3.276273  | 0.361099  |
| H | 1.281117  | 4.070783  | -1.133636 |
| C | 0.411613  | 1.546458  | -1.755377 |
| H | 0.639817  | 0.979183  | -0.830759 |
| H | -0.065073 | 0.856579  | -2.481265 |
| H | 1.376061  | 1.874494  | -2.200498 |
| H | 0.053599  | 1.256401  | 1.197372  |
| C | -1.224344 | 2.728398  | 2.483232  |
| O | -1.011159 | 3.770751  | 2.993788  |
| P | -1.986883 | 2.202500  | -0.443687 |
| O | -3.769553 | 1.103017  | 2.650896  |
| C | -4.612398 | 0.336539  | 3.108481  |
| H | -5.474725 | 0.720078  | 3.715741  |
| C | -4.718921 | -1.148046 | 2.778823  |
| O | -5.857704 | -1.640568 | 2.716644  |
| N | -3.548947 | -1.766720 | 2.520212  |
| H | -2.618746 | -1.231992 | 2.680141  |
| C | -3.529566 | -3.149276 | 2.071530  |
| H | -2.492450 | -3.528000 | 2.193412  |
| H | -4.190717 | -3.764263 | 2.723996  |
| C | -3.976453 | -3.296298 | 0.606584  |
| H | -3.453799 | -2.523331 | 0.004554  |
| H | -5.060661 | -3.059688 | 0.549867  |
| C | -3.689426 | -4.679007 | 0.014166  |
| H | -2.599012 | -4.895068 | 0.109379  |
| H | -4.206081 | -5.465818 | 0.610729  |
| C | -4.095615 | -4.801191 | -1.460654 |
| H | -3.612159 | -3.978433 | -2.037794 |
| H | -5.191843 | -4.626006 | -1.557658 |

|   |           |           |           |
|---|-----------|-----------|-----------|
| C | -3.731082 | -6.149216 | -2.098837 |
| H | -2.633236 | -6.314073 | -1.997116 |
| H | -4.209282 | -6.970502 | -1.517908 |
| C | -4.135226 | -6.254592 | -3.574556 |
| H | -3.644358 | -5.464884 | -4.183931 |
| H | -3.856575 | -7.236096 | -4.011490 |
| H | -5.232255 | -6.130689 | -3.700633 |

109

N SCF Done: -2329.87294870 A.U.

Number of imaginary frequencies = 0

|    |           |           |           |
|----|-----------|-----------|-----------|
| C  | -0.842256 | 0.357359  | -1.143829 |
| H  | -1.209675 | 2.157499  | -2.328813 |
| N  | -1.792105 | -1.004765 | 2.560492  |
| C  | -0.537869 | -1.567539 | 2.004605  |
| C  | -0.348985 | -1.224592 | 0.546239  |
| N  | -0.906254 | -0.054446 | 0.150066  |
| C  | -1.675507 | 1.559971  | -1.518260 |
| H  | -0.465036 | -2.666832 | 2.161451  |
| H  | 0.306575  | -1.109608 | 2.570089  |
| H  | -2.643947 | 1.173224  | -1.905180 |
| C  | 0.379857  | -2.016716 | -0.354368 |
| H  | 0.821347  | -2.966531 | -0.017671 |
| C  | 0.529327  | -1.571862 | -1.678552 |
| H  | 1.108742  | -2.165913 | -2.402326 |
| C  | -0.093091 | -0.378654 | -2.079676 |
| H  | -0.027466 | -0.027732 | -3.120368 |
| Ru | -2.187040 | 0.878821  | 1.535315  |
| C  | -1.765417 | -0.956840 | 4.040290  |
| H  | -0.994870 | -0.220180 | 4.349456  |
| H  | -2.741389 | -0.537818 | 4.359224  |
| C  | -1.531246 | -2.298244 | 4.715874  |
| C  | -2.228540 | -3.452129 | 4.292085  |
| C  | -0.629878 | -2.412991 | 5.793859  |
| C  | -2.031663 | -4.685482 | 4.934475  |
| C  | -0.435788 | -3.644902 | 6.443709  |
| C  | -1.136320 | -4.785744 | 6.015167  |
| H  | -2.929895 | -3.376909 | 3.445940  |
| H  | -0.073929 | -1.521836 | 6.130230  |
| H  | -2.584640 | -5.574620 | 4.591369  |
| H  | 0.270724  | -3.714425 | 7.286283  |
| H  | -0.983563 | -5.752500 | 6.520653  |
| C  | -0.754427 | 3.855289  | 0.176611  |
| C  | -3.805586 | 3.408330  | -0.545255 |
| C  | -4.931509 | 2.361576  | -0.385771 |
| H  | -5.886127 | 2.806881  | -0.741557 |
| H  | -4.746113 | 1.431981  | -0.957384 |
| H  | -5.061812 | 2.064497  | 0.672290  |
| C  | -3.784211 | 3.891466  | -2.011639 |
| H  | -2.991406 | 4.633733  | -2.218377 |
| H  | -3.667896 | 3.050840  | -2.725889 |



|   |           |           |           |
|---|-----------|-----------|-----------|
| H | -4.758203 | 4.375353  | -2.244615 |
| C | -4.102262 | 4.586478  | 0.406911  |
| H | -5.128856 | 4.963773  | 0.207298  |
| H | -4.065972 | 4.271752  | 1.470308  |
| H | -3.406730 | 5.437505  | 0.264704  |
| C | -0.733078 | 4.921860  | -0.933953 |
| H | 0.168974  | 5.560762  | -0.809603 |
| H | -0.677310 | 4.475339  | -1.949051 |
| H | -1.613675 | 5.592867  | -0.895409 |
| C | -0.869650 | 4.523650  | 1.564298  |
| H | -1.768440 | 5.162594  | 1.656464  |
| H | -0.905179 | 3.758777  | 2.366190  |
| H | 0.018493  | 5.170800  | 1.734654  |
| C | 0.570673  | 3.058029  | 0.128759  |
| H | 0.576361  | 2.241836  | 0.879164  |
| H | 0.768219  | 2.620657  | -0.872009 |
| H | 1.414141  | 3.745064  | 0.357860  |
| H | -0.958784 | 1.526477  | 2.367553  |
| C | -3.313912 | 1.699934  | 2.736698  |
| O | -4.029345 | 2.243250  | 3.502718  |
| P | -2.170829 | 2.557893  | 0.003837  |
| O | -3.508378 | -0.349283 | 0.281437  |
| C | -4.648512 | -0.902992 | 0.777580  |
| C | -5.569798 | -1.402687 | -0.381936 |
| O | -6.685140 | -1.905731 | -0.200334 |
| H | -2.654009 | -1.546911 | 2.242454  |
| N | -4.356249 | -2.066536 | 1.700331  |
| H | -4.200198 | -2.890612 | 1.101667  |
| C | -5.440257 | -2.369650 | 2.664334  |
| H | -6.435308 | -2.302564 | 2.168290  |
| H | -5.325973 | -3.426114 | 2.995274  |
| C | -5.384601 | -1.447107 | 3.887858  |
| H | -4.473174 | -1.684260 | 4.479187  |
| H | -5.265615 | -0.392931 | 3.551626  |
| C | -6.616907 | -1.553692 | 4.793829  |
| H | -7.527722 | -1.288919 | 4.209233  |
| H | -6.759844 | -2.614056 | 5.108443  |
| C | -6.527455 | -0.659372 | 6.038315  |
| H | -6.363359 | 0.395753  | 5.718859  |
| H | -5.620254 | -0.936320 | 6.624815  |
| C | -7.761965 | -0.731659 | 6.949062  |
| H | -8.665707 | -0.452776 | 6.360276  |
| H | -7.924321 | -1.788769 | 7.261986  |
| C | -7.655951 | 0.164749  | 8.189221  |
| H | -7.526387 | 1.230978  | 7.903890  |
| H | -8.560774 | 0.095892  | 8.828743  |
| H | -6.780827 | -0.115660 | 8.814498  |
| H | -5.275243 | -0.195877 | 1.384323  |
| N | -4.972091 | -1.233232 | -1.597146 |
| H | -4.019492 | -0.842685 | -1.489723 |
| C | -5.513927 | -1.717607 | -2.847098 |

|   |           |           |           |
|---|-----------|-----------|-----------|
| H | -6.579193 | -1.969135 | -2.653099 |
| H | -5.499453 | -0.903412 | -3.608499 |
| C | -4.771907 | -2.950497 | -3.391375 |
| H | -3.690847 | -2.705326 | -3.510863 |
| H | -4.821327 | -3.757634 | -2.626585 |
| C | -5.338216 | -3.455164 | -4.724890 |
| H | -5.299442 | -2.634198 | -5.478661 |
| H | -6.419752 | -3.691964 | -4.598005 |
| C | -4.609320 | -4.687031 | -5.280095 |
| H | -4.649410 | -5.508459 | -4.527388 |
| H | -3.526546 | -4.450297 | -5.404534 |
| C | -5.174581 | -5.193904 | -6.615478 |
| H | -5.134928 | -4.370020 | -7.364534 |
| H | -6.256004 | -5.428373 | -6.487252 |
| C | -4.439535 | -6.424721 | -7.160778 |
| H | -4.868765 | -6.768852 | -8.124778 |
| H | -3.362808 | -6.208140 | -7.331692 |
| H | -4.494208 | -7.274959 | -6.447171 |

109

O SCF Done: -2329.87033381 A.U.

Number of imaginary frequencies = 0

|    |           |           |           |
|----|-----------|-----------|-----------|
| C  | -1.531847 | -0.226718 | -1.564370 |
| H  | -2.117159 | 0.974055  | -3.288306 |
| N  | -2.338570 | -0.341263 | 2.406747  |
| C  | -1.048016 | -0.966741 | 2.040604  |
| C  | -0.890262 | -1.102947 | 0.546656  |
| N  | -1.633095 | -0.246408 | -0.202719 |
| C  | -2.490510 | 0.675327  | -2.288422 |
| H  | -0.917506 | -1.957072 | 2.532626  |
| H  | -0.218170 | -0.318750 | 2.409714  |
| H  | -3.423533 | 0.073250  | -2.415794 |
| C  | 0.021156  | -1.983627 | -0.058041 |
| H  | 0.605827  | -2.676360 | 0.564994  |
| C  | 0.177155  | -1.945053 | -1.451220 |
| H  | 0.888579  | -2.619911 | -1.950551 |
| C  | -0.605858 | -1.061115 | -2.211358 |
| H  | -0.524071 | -1.031916 | -3.307531 |
| Ru | -2.883496 | 1.126398  | 0.864205  |
| C  | -2.373918 | 0.050497  | 3.834754  |
| H  | -1.646329 | 0.872878  | 4.005968  |
| H  | -3.380666 | 0.481420  | 4.019158  |
| C  | -2.124833 | -1.087497 | 4.813684  |
| C  | -2.758172 | -2.340700 | 4.642813  |
| C  | -1.285755 | -0.897096 | 5.930307  |
| C  | -2.545087 | -3.374003 | 5.569546  |
| C  | -1.085839 | -1.927382 | 6.866765  |
| C  | -1.713832 | -3.171687 | 6.686656  |
| H  | -3.428075 | -2.498264 | 3.781295  |
| H  | -0.784705 | 0.075470  | 6.071485  |
| H  | -3.046611 | -4.344256 | 5.425415  |

|   |           |           |           |
|---|-----------|-----------|-----------|
| H | -0.432530 | -1.757683 | 7.737612  |
| H | -1.558457 | -3.981842 | 7.416658  |
| H | -1.634541 | 2.029017  | 1.228235  |
| C | -3.919038 | 2.356789  | 1.766470  |
| O | -4.572142 | 3.162763  | 2.323226  |
| P | -3.011159 | 2.121104  | -1.203829 |
| O | -4.157478 | -2.012098 | 1.757714  |
| C | -4.796800 | -1.378985 | 0.750674  |
| C | -4.540538 | -2.078541 | -0.626093 |
| O | -4.586775 | -1.520728 | -1.735692 |
| H | -3.143621 | -1.117599 | 2.200258  |
| N | -6.244150 | -1.178669 | 0.883598  |
| H | -6.640058 | -2.080667 | 1.180022  |
| C | -6.706050 | -0.098217 | 1.759548  |
| H | -6.460062 | 0.868299  | 1.268987  |
| H | -7.817908 | -0.150664 | 1.778641  |
| C | -6.169356 | -0.050093 | 3.202807  |
| H | -5.077249 | 0.145963  | 3.161796  |
| H | -6.616080 | 0.837341  | 3.707298  |
| C | -6.412636 | -1.313464 | 4.032703  |
| H | -7.500469 | -1.561858 | 4.039501  |
| H | -5.893905 | -2.157464 | 3.526713  |
| C | -5.900140 | -1.191008 | 5.474061  |
| H | -6.451296 | -0.379392 | 6.004208  |
| H | -4.836522 | -0.862654 | 5.452261  |
| C | -5.987988 | -2.488440 | 6.288154  |
| H | -7.052971 | -2.806577 | 6.368094  |
| H | -5.472830 | -3.298244 | 5.723297  |
| C | -5.364870 | -2.365377 | 7.683637  |
| H | -5.861579 | -1.568744 | 8.278886  |
| H | -5.443184 | -3.312193 | 8.258548  |
| H | -4.286828 | -2.106034 | 7.609981  |
| H | -4.410263 | -0.291332 | 0.539895  |
| C | -1.666050 | 3.461337  | -1.541706 |
| C | -4.699659 | 2.638409  | -1.953256 |
| C | -5.741877 | 1.652683  | -1.381695 |
| H | -6.730133 | 1.864417  | -1.845081 |
| H | -5.494373 | 0.587859  | -1.569816 |
| H | -5.850577 | 1.781611  | -0.288027 |
| C | -1.736767 | 4.072117  | -2.954347 |
| H | -1.677322 | 3.301277  | -3.750877 |
| H | -2.655804 | 4.669180  | -3.114004 |
| H | -0.872945 | 4.757776  | -3.099029 |
| C | -4.731547 | 2.552873  | -3.494656 |
| H | -3.988039 | 3.205057  | -3.989291 |
| H | -4.583667 | 1.514323  | -3.852976 |
| H | -5.736545 | 2.872856  | -3.846975 |
| C | -1.792182 | 4.569642  | -0.473155 |
| H | -2.742761 | 5.130538  | -0.550359 |
| H | -1.727551 | 4.147545  | 0.549581  |
| H | -0.962650 | 5.298962  | -0.600802 |

|   |           |           |           |
|---|-----------|-----------|-----------|
| C | -5.054062 | 4.062348  | -1.476303 |
| H | -6.108109 | 4.282786  | -1.752247 |
| H | -4.974710 | 4.156143  | -0.373307 |
| H | -4.422578 | 4.843553  | -1.944980 |
| C | -0.292239 | 2.769901  | -1.373649 |
| H | -0.205021 | 2.261026  | -0.392520 |
| H | -0.091495 | 2.025778  | -2.171375 |
| H | 0.508600  | 3.538698  | -1.432122 |
| N | -4.276943 | -3.398921 | -0.451555 |
| H | -4.084300 | -3.622228 | 0.538069  |
| C | -3.933786 | -4.289290 | -1.544503 |
| H | -4.129900 | -5.336420 | -1.227313 |
| H | -4.617041 | -4.064040 | -2.392251 |
| C | -2.480084 | -4.119978 | -2.011960 |
| H | -2.350392 | -3.057158 | -2.305590 |
| H | -1.795391 | -4.285540 | -1.149346 |
| C | -2.090581 | -5.034373 | -3.178075 |
| H | -2.794402 | -4.871508 | -4.026814 |
| H | -2.219921 | -6.101530 | -2.881819 |
| C | -0.651498 | -4.813748 | -3.666012 |
| H | -0.528332 | -3.746568 | -3.965281 |
| H | 0.052295  | -4.967325 | -2.814311 |
| C | -0.236752 | -5.718851 | -4.834978 |
| H | -0.942967 | -5.565229 | -5.682532 |
| H | -0.360056 | -6.783827 | -4.532682 |
| C | 1.201910  | -5.477861 | -5.308780 |
| H | 1.343201  | -4.429387 | -5.649966 |
| H | 1.931456  | -5.658703 | -4.489865 |
| H | 1.476449  | -6.143392 | -6.153370 |

109

TS-OP SCF Done: -2329.86381614 A.U.

Number of imaginary frequencies = 1

Imaginary frequency = -281.36 cm<sup>-1</sup>

|    |           |           |           |
|----|-----------|-----------|-----------|
| C  | -2.077149 | -1.169864 | -0.984433 |
| H  | -2.812966 | -0.166018 | -2.775425 |
| N  | -1.884326 | -0.410213 | 2.955641  |
| C  | -0.820222 | -1.332119 | 2.494836  |
| C  | -1.098251 | -1.794643 | 1.084836  |
| N  | -1.790051 | -0.908701 | 0.322356  |
| C  | -2.975912 | -0.178589 | -1.678384 |
| H  | -0.698932 | -2.201896 | 3.178987  |
| H  | 0.145034  | -0.774077 | 2.491651  |
| H  | -4.027899 | -0.503404 | -1.498198 |
| C  | -0.642421 | -3.006618 | 0.544142  |
| H  | -0.099218 | -3.719971 | 1.181542  |
| C  | -0.868316 | -3.268118 | -0.817870 |
| H  | -0.497510 | -4.198324 | -1.275398 |
| C  | -1.585785 | -2.339146 | -1.589599 |
| H  | -1.793796 | -2.529796 | -2.652390 |
| Ru | -2.441868 | 0.840655  | 1.285354  |

|   |           |           |           |
|---|-----------|-----------|-----------|
| C | -1.589111 | 0.219799  | 4.264898  |
| H | -0.715606 | 0.894410  | 4.145778  |
| H | -2.462416 | 0.862145  | 4.501106  |
| C | -1.357652 | -0.783394 | 5.382684  |
| C | -2.351186 | -1.743397 | 5.686017  |
| C | -0.155070 | -0.790291 | 6.117658  |
| C | -2.138982 | -2.683466 | 6.707443  |
| C | 0.054615  | -1.728019 | 7.145183  |
| C | -0.937897 | -2.677662 | 7.441957  |
| H | -3.286183 | -1.761220 | 5.100221  |
| H | 0.627050  | -0.048839 | 5.882660  |
| H | -2.920150 | -3.426784 | 6.934367  |
| H | 0.998684  | -1.717954 | 7.713309  |
| H | -0.775970 | -3.414735 | 8.244744  |
| H | -0.922234 | 1.437562  | 1.263215  |
| C | -2.966926 | 2.414377  | 2.095176  |
| O | -3.285399 | 3.444531  | 2.576888  |
| P | -2.860662 | 1.513657  | -0.850655 |
| O | -4.110309 | -1.775312 | 2.882068  |
| C | -4.816579 | -1.157971 | 1.983875  |
| C | -5.067633 | -1.910942 | 0.640650  |
| O | -5.814170 | -1.468781 | -0.248031 |
| H | -2.785788 | -0.999873 | 3.048065  |
| N | -5.937684 | -0.406302 | 2.372512  |
| H | -6.432822 | -0.041815 | 1.548934  |
| C | -5.707571 | 0.581246  | 3.413892  |
| H | -5.508353 | 0.055046  | 4.372654  |
| H | -4.768497 | 1.148663  | 3.171997  |
| C | -6.866003 | 1.567533  | 3.559410  |
| H | -7.088422 | 2.012299  | 2.561050  |
| H | -7.788464 | 1.027345  | 3.870012  |
| C | -6.545860 | 2.697882  | 4.547040  |
| H | -6.304181 | 2.260237  | 5.543372  |
| H | -5.620050 | 3.218198  | 4.210725  |
| C | -7.679528 | 3.720577  | 4.701687  |
| H | -8.608351 | 3.199561  | 5.032496  |
| H | -7.920611 | 4.154612  | 3.703177  |
| C | -7.356536 | 4.857452  | 5.682856  |
| H | -7.116599 | 4.421230  | 6.679592  |
| H | -6.425804 | 5.370806  | 5.349970  |
| C | -8.490521 | 5.880272  | 5.825280  |
| H | -9.424041 | 5.399064  | 6.189235  |
| H | -8.230365 | 6.689285  | 6.539462  |
| H | -8.726358 | 6.357728  | 4.849687  |
| H | -3.979527 | -0.121649 | 1.374027  |
| C | -1.393853 | 2.364488  | -1.776808 |
| C | -4.522438 | 2.366438  | -1.306961 |
| C | -5.578629 | 1.845600  | -0.307234 |
| H | -6.559622 | 2.310692  | -0.550224 |
| H | -5.702443 | 0.745048  | -0.361016 |
| H | -5.316220 | 2.115276  | 0.734296  |

|   |           |           |           |
|---|-----------|-----------|-----------|
| C | -1.700320 | 2.735193  | -3.240007 |
| H | -2.030701 | 1.859415  | -3.837331 |
| H | -2.470315 | 3.526603  | -3.327035 |
| H | -0.775887 | 3.126150  | -3.719735 |
| C | -4.998905 | 2.040969  | -2.738916 |
| H | -4.285814 | 2.360920  | -3.521042 |
| H | -5.201935 | 0.958863  | -2.870329 |
| H | -5.957333 | 2.572153  | -2.929121 |
| C | -0.969489 | 3.616258  | -0.977698 |
| H | -1.740726 | 4.409571  | -0.982446 |
| H | -0.751337 | 3.352857  | 0.077130  |
| H | -0.047662 | 4.044562  | -1.428691 |
| C | -4.380399 | 3.890794  | -1.110104 |
| H | -5.383431 | 4.361018  | -1.204665 |
| H | -3.992471 | 4.138553  | -0.100449 |
| H | -3.724956 | 4.364053  | -1.867813 |
| C | -0.218400 | 1.358784  | -1.757406 |
| H | 0.000278  | 1.012615  | -0.726825 |
| H | -0.405230 | 0.472640  | -2.398169 |
| H | 0.692201  | 1.860619  | -2.151010 |
| N | -4.336509 | -3.049006 | 0.609151  |
| H | -3.861400 | -3.188143 | 1.518065  |
| C | -4.321187 | -4.107321 | -0.389588 |
| H | -3.289111 | -4.524603 | -0.399301 |
| H | -4.989671 | -4.942017 | -0.067047 |
| C | -4.697986 | -3.679147 | -1.813647 |
| H | -4.160750 | -2.743382 | -2.068514 |
| H | -5.773108 | -3.412914 | -1.857094 |
| C | -4.356660 | -4.761774 | -2.844228 |
| H | -3.266984 | -4.996967 | -2.786848 |
| H | -4.879930 | -5.711429 | -2.584784 |
| C | -4.711578 | -4.359428 | -4.282149 |
| H | -4.189450 | -3.406336 | -4.534405 |
| H | -5.799114 | -4.123563 | -4.339657 |
| C | -4.362468 | -5.423531 | -5.333041 |
| H | -3.274948 | -5.658080 | -5.268299 |
| H | -4.887465 | -6.372491 | -5.078426 |
| C | -4.717097 | -5.003811 | -6.764974 |
| H | -4.179128 | -4.076361 | -7.057773 |
| H | -4.454829 | -5.790200 | -7.502908 |
| H | -5.804416 | -4.798143 | -6.865992 |

109

P SCF Done: -2329.87624854 A.U.

Number of imaginary frequencies = 0

|   |           |           |           |
|---|-----------|-----------|-----------|
| C | -1.069674 | 0.052743  | -1.188524 |
| H | -1.606109 | 1.079386  | -3.035939 |
| N | -2.164452 | 0.155298  | 2.683888  |
| C | -0.783751 | -0.343652 | 2.475765  |
| C | -0.524714 | -0.620204 | 1.016689  |
| N | -1.242582 | 0.155384  | 0.161254  |

|    |           |           |           |
|----|-----------|-----------|-----------|
| C  | -2.022589 | 0.854856  | -2.032850 |
| H  | -0.558762 | -1.237576 | 3.100209  |
| H  | -0.094822 | 0.475219  | 2.789461  |
| H  | -2.939587 | 0.235328  | -2.174496 |
| C  | 0.436444  | -1.525511 | 0.543397  |
| H  | 0.999594  | -2.146592 | 1.256049  |
| C  | 0.681666  | -1.595352 | -0.839368 |
| H  | 1.446995  | -2.279205 | -1.237372 |
| C  | -0.080105 | -0.798177 | -1.710480 |
| H  | 0.073911  | -0.844604 | -2.798744 |
| Ru | -2.596451 | 1.508843  | 1.017159  |
| C  | -2.382532 | 0.653597  | 4.060916  |
| H  | -1.722292 | 1.532337  | 4.213371  |
| H  | -3.422778 | 1.039943  | 4.095046  |
| C  | -2.179764 | -0.384587 | 5.154625  |
| C  | -2.705376 | -1.690694 | 5.021876  |
| C  | -1.491146 | -0.049924 | 6.338990  |
| C  | -2.543904 | -2.632258 | 6.052345  |
| C  | -1.340328 | -0.987874 | 7.375641  |
| C  | -1.866571 | -2.284073 | 7.234777  |
| H  | -3.253445 | -1.973874 | 4.109141  |
| H  | -1.070582 | 0.963373  | 6.451606  |
| H  | -2.965161 | -3.643172 | 5.934162  |
| H  | -0.804153 | -0.705678 | 8.295868  |
| H  | -1.748130 | -3.022146 | 8.043912  |
| H  | -1.290753 | 2.430167  | 1.589725  |
| C  | -3.790541 | 2.695106  | 1.770239  |
| O  | -4.573358 | 3.446947  | 2.237754  |
| P  | -2.634535 | 2.368489  | -1.077596 |
| O  | -3.939656 | -1.836728 | 1.941231  |
| C  | -4.645425 | -1.488190 | 0.963219  |
| C  | -4.224982 | -1.880559 | -0.474903 |
| O  | -4.882660 | -1.565433 | -1.479172 |
| H  | -2.833376 | -0.627955 | 2.490773  |
| N  | -5.881092 | -0.938744 | 0.987702  |
| H  | -6.210044 | -0.777180 | 0.024360  |
| C  | -6.414795 | -0.013939 | 1.989860  |
| H  | -6.035559 | 1.006709  | 1.743286  |
| H  | -7.518486 | -0.002680 | 1.857715  |
| C  | -6.069077 | -0.314998 | 3.449127  |
| H  | -4.983052 | -0.158217 | 3.601182  |
| H  | -6.576643 | 0.465935  | 4.058717  |
| C  | -6.442599 | -1.708931 | 3.964794  |
| H  | -7.503360 | -1.943391 | 3.716291  |
| H  | -5.821444 | -2.456783 | 3.424936  |
| C  | -6.213456 | -1.844593 | 5.478219  |
| H  | -6.964912 | -1.231735 | 6.028305  |
| H  | -5.224099 | -1.403653 | 5.735941  |
| C  | -6.249842 | -3.289561 | 5.993528  |
| H  | -7.234618 | -3.750090 | 5.749356  |
| H  | -5.494391 | -3.886791 | 5.432316  |

|   |           |           |           |
|---|-----------|-----------|-----------|
| C | -5.975900 | -3.397809 | 7.498641  |
| H | -6.731651 | -2.834334 | 8.087198  |
| H | -5.994572 | -4.450913 | 7.849771  |
| H | -4.979710 | -2.973484 | 7.749444  |
| H | -3.802346 | 0.456005  | 0.508151  |
| C | -1.309947 | 3.723138  | -1.475190 |
| C | -4.295210 | 2.789931  | -1.956698 |
| C | -5.374026 | 1.823242  | -1.418437 |
| H | -6.332067 | 2.039140  | -1.941907 |
| H | -5.124036 | 0.757983  | -1.595565 |
| H | -5.528908 | 1.957211  | -0.331441 |
| C | -1.322833 | 4.245024  | -2.923380 |
| H | -1.208463 | 3.429042  | -3.667916 |
| H | -2.243004 | 4.812816  | -3.165338 |
| H | -0.465824 | 4.939658  | -3.068545 |
| C | -4.229671 | 2.629276  | -3.491779 |
| H | -3.471560 | 3.275548  | -3.969876 |
| H | -4.032030 | 1.579523  | -3.789812 |
| H | -5.216667 | 2.904138  | -3.924793 |
| C | -1.505143 | 4.885278  | -0.476819 |
| H | -2.450788 | 5.436557  | -0.642268 |
| H | -1.501034 | 4.504728  | 0.565194  |
| H | -0.670744 | 5.611802  | -0.590518 |
| C | -4.702622 | 4.229827  | -1.577466 |
| H | -5.736098 | 4.423621  | -1.939301 |
| H | -4.701108 | 4.377384  | -0.477679 |
| H | -4.045992 | 4.994868  | -2.037120 |
| C | 0.065238  | 3.073082  | -1.193955 |
| H | 0.091630  | 2.620510  | -0.180933 |
| H | 0.330396  | 2.298977  | -1.943457 |
| H | 0.852351  | 3.857026  | -1.240495 |
| N | -3.089011 | -2.612635 | -0.494496 |
| H | -2.647111 | -2.764344 | 0.420012  |
| C | -2.515281 | -3.153097 | -1.714570 |
| H | -2.041412 | -2.334053 | -2.302319 |
| H | -3.341630 | -3.543040 | -2.348614 |
| C | -1.479913 | -4.236709 | -1.409001 |
| H | -0.772342 | -3.847092 | -0.642903 |
| H | -1.983605 | -5.116446 | -0.949254 |
| C | -0.684039 | -4.665932 | -2.646929 |
| H | -0.204541 | -3.766089 | -3.098226 |
| H | -1.380265 | -5.056124 | -3.424313 |
| C | 0.394242  | -5.715890 | -2.347120 |
| H | 1.085144  | -5.317968 | -1.566974 |
| H | -0.081011 | -6.615221 | -1.891462 |
| C | 1.208342  | -6.138213 | -3.579134 |
| H | 1.677295  | -5.235174 | -4.033226 |
| H | 0.514828  | -6.535734 | -4.354869 |
| C | 2.288710  | -7.180914 | -3.266599 |
| H | 2.860486  | -7.466576 | -4.173760 |
| H | 3.015885  | -6.796294 | -2.519313 |



H 1.843610 -8.107788 -2.845200

46

oxalamide SCF Done: -810.726579095 A.U.

Number of imaginary frequencies = 0

|   |           |           |           |
|---|-----------|-----------|-----------|
| O | -2.239535 | 0.650177  | -1.494117 |
| C | -3.117597 | 0.540487  | -2.358017 |
| C | -2.959882 | 1.142870  | -3.781380 |
| O | -3.855022 | 1.070049  | -4.631547 |
| N | -1.745889 | 1.726379  | -3.938477 |
| H | -1.157215 | 1.718252  | -3.095916 |
| C | -1.345232 | 2.440526  | -5.137168 |
| H | -0.331504 | 2.100138  | -5.446653 |
| H | -2.055166 | 2.140231  | -5.936352 |
| C | -1.359068 | 3.968780  | -4.964401 |
| H | -2.383961 | 4.281747  | -4.665261 |
| H | -0.689910 | 4.250732  | -4.119281 |
| C | -0.931279 | 4.715143  | -6.235128 |
| H | 0.090315  | 4.383751  | -6.534549 |
| H | -1.599778 | 4.421109  | -7.076947 |
| C | -0.945013 | 6.242913  | -6.084347 |
| H | -1.966273 | 6.573677  | -5.783961 |
| H | -0.276842 | 6.536384  | -5.241430 |
| C | -0.520453 | 6.994864  | -7.354755 |
| H | 0.499623  | 6.660405  | -7.652861 |
| H | -1.189400 | 6.697775  | -8.194569 |
| C | -0.538414 | 8.519954  | -7.193527 |
| H | -0.227942 | 9.036854  | -8.125279 |
| H | -1.554529 | 8.884921  | -6.930314 |
| H | 0.148467  | 8.847461  | -6.383589 |
| N | -4.306753 | -0.096756 | -2.221041 |
| H | -4.917834 | -0.039772 | -3.045578 |
| C | -4.764661 | -0.688012 | -0.976809 |
| H | -5.145492 | -1.714998 | -1.175776 |
| H | -3.870988 | -0.785291 | -0.325075 |
| C | -5.845527 | 0.148253  | -0.271157 |
| H | -6.709849 | 0.290711  | -0.959745 |
| H | -5.435403 | 1.163746  | -0.075173 |
| C | -6.327224 | -0.486552 | 1.040258  |
| H | -6.722219 | -1.508790 | 0.834969  |
| H | -5.456040 | -0.633411 | 1.719574  |
| C | -7.402660 | 0.337064  | 1.762805  |
| H | -7.007561 | 1.359134  | 1.967446  |
| H | -8.273225 | 0.484936  | 1.082118  |
| C | -7.886816 | -0.293246 | 3.077319  |
| H | -7.014063 | -0.440500 | 3.753825  |
| H | -8.278988 | -1.315064 | 2.869086  |
| C | -8.960420 | 0.537525  | 3.791047  |
| H | -8.582980 | 1.551952  | 4.042937  |
| H | -9.858614 | 0.670781  | 3.150304  |
| H | -9.291344 | 0.059175  | 4.736250  |

43

A-PCH3 SCF Done: -1281.95436156 A.U.

Number of imaginary frequencies = 0

|    |           |           |           |
|----|-----------|-----------|-----------|
| C  | -0.537425 | -0.108444 | -0.633543 |
| H  | 0.372312  | 1.660926  | -1.432245 |
| N  | -0.814353 | 0.249204  | 3.323088  |
| C  | -0.511124 | -1.113782 | 2.929747  |
| C  | -0.429519 | -1.266153 | 1.435949  |
| N  | -0.538439 | -0.103596 | 0.736103  |
| C  | -0.651336 | 1.244637  | -1.291704 |
| H  | -1.278952 | -1.834368 | 3.314488  |
| H  | 0.459998  | -1.466725 | 3.372726  |
| H  | -1.128919 | 1.183428  | -2.292018 |
| C  | -0.289997 | -2.497519 | 0.773320  |
| H  | -0.202974 | -3.423158 | 1.362075  |
| C  | -0.287556 | -2.522592 | -0.628097 |
| H  | -0.192759 | -3.476734 | -1.169168 |
| C  | -0.420584 | -1.313731 | -1.338631 |
| H  | -0.428488 | -1.301905 | -2.438713 |
| Ru | -0.834999 | 1.638453  | 1.887648  |
| C  | -1.039478 | 0.369275  | 4.760064  |
| H  | -0.210049 | -0.107814 | 5.341642  |
| H  | -1.033021 | 1.445825  | 5.024083  |
| C  | -2.366635 | -0.250696 | 5.191709  |
| C  | -3.567754 | 0.206389  | 4.606209  |
| C  | -2.428038 | -1.291850 | 6.138344  |
| C  | -4.800463 | -0.357151 | 4.969714  |
| C  | -3.662332 | -1.862731 | 6.503754  |
| C  | -4.851881 | -1.395773 | 5.920379  |
| H  | -3.515137 | 1.006243  | 3.848529  |
| H  | -1.494178 | -1.660203 | 6.596449  |
| H  | -5.730712 | 0.015231  | 4.510617  |
| H  | -3.692612 | -2.677972 | 7.244757  |
| H  | -5.819552 | -1.840222 | 6.203654  |
| H  | 0.505406  | 2.346562  | 1.393469  |
| C  | -1.217013 | 3.159078  | 2.871811  |
| O  | -1.465038 | 4.152068  | 3.453665  |
| P  | -1.492539 | 2.454328  | -0.115322 |
| C  | -1.011377 | 4.100594  | -0.805655 |
| H  | -1.516083 | 4.886743  | -0.208289 |
| H  | 0.082585  | 4.228424  | -0.687451 |
| H  | -1.297087 | 4.211000  | -1.872330 |
| C  | -3.282479 | 2.349749  | -0.595611 |
| H  | -3.450332 | 2.600473  | -1.664646 |
| H  | -3.638525 | 1.320486  | -0.389353 |
| H  | -3.859503 | 3.047603  | 0.044516  |

45

TS-EF-PCH3 SCF Done: -1283.11235866 A.U.

Number of imaginary frequencies = 1

Imaginary frequency = -931.12 cm<sup>-1</sup>

|    |           |           |           |
|----|-----------|-----------|-----------|
| C  | -0.568213 | 0.170474  | -0.679704 |
| H  | -0.680582 | 1.458412  | -2.438280 |
| N  | -1.306615 | 0.539339  | 3.263737  |
| C  | -0.222841 | -0.380669 | 2.968105  |
| C  | -0.146264 | -0.687453 | 1.492016  |
| N  | -0.618768 | 0.291280  | 0.676210  |
| C  | -1.212192 | 1.280053  | -1.479724 |
| H  | -2.478624 | 0.759780  | 2.411192  |
| H  | -0.299716 | -1.333060 | 3.548226  |
| H  | 0.773285  | 0.072854  | 3.246963  |
| H  | -2.249781 | 0.968924  | -1.738284 |
| C  | 0.417405  | -1.856029 | 0.953017  |
| H  | 0.784764  | -2.642985 | 1.628249  |
| C  | 0.512062  | -1.987978 | -0.440734 |
| H  | 0.963723  | -2.888529 | -0.885296 |
| C  | 0.016132  | -0.964446 | -1.266543 |
| H  | 0.064309  | -1.046668 | -2.362575 |
| Ru | -1.375347 | 2.015298  | 1.655531  |
| C  | -1.342899 | 0.970318  | 4.650049  |
| H  | -0.403999 | 1.514292  | 4.936510  |
| H  | -2.164835 | 1.713763  | 4.750290  |
| C  | -1.585812 | -0.166556 | 5.640200  |
| C  | -2.532872 | -1.171962 | 5.347809  |
| C  | -0.887725 | -0.233949 | 6.862658  |
| C  | -2.781457 | -2.212299 | 6.257835  |
| C  | -1.137502 | -1.270444 | 7.780295  |
| C  | -2.085769 | -2.263971 | 7.480456  |
| H  | -3.063881 | -1.129367 | 4.382603  |
| H  | -0.135869 | 0.538673  | 7.097031  |
| H  | -3.524465 | -2.989040 | 6.013659  |
| H  | -0.582853 | -1.305794 | 8.732007  |
| H  | -2.279860 | -3.079495 | 8.195516  |
| H  | 0.172016  | 2.512834  | 1.790974  |
| C  | -1.846531 | 3.579053  | 2.529155  |
| O  | -2.101660 | 4.593077  | 3.064342  |
| P  | -1.393457 | 2.850110  | -0.445523 |
| H  | -3.031860 | 1.207345  | 1.699622  |
| C  | 0.001723  | 3.914248  | -1.032387 |
| H  | -0.029684 | 4.870693  | -0.472242 |
| H  | 0.952762  | 3.404723  | -0.781000 |
| H  | -0.048516 | 4.117902  | -2.122613 |
| C  | -2.859393 | 3.671097  | -1.217791 |
| H  | -2.738420 | 3.806373  | -2.313085 |
| H  | -3.759842 | 3.061140  | -1.005802 |
| H  | -2.994398 | 4.662572  | -0.739946 |

55

A-PiPr SCF Done: -1439.26462664 A.U.

Number of imaginary frequencies = 0

|   |           |           |           |
|---|-----------|-----------|-----------|
| C | -0.622003 | -0.013579 | -0.739321 |
|---|-----------|-----------|-----------|

|    |           |           |           |
|----|-----------|-----------|-----------|
| H  | -0.587863 | 1.468004  | -2.344337 |
| N  | -0.924325 | 0.251918  | 3.216892  |
| C  | -0.525582 | -1.076551 | 2.802513  |
| C  | -0.370813 | -1.182653 | 1.309877  |
| N  | -0.600049 | -0.024988 | 0.628743  |
| C  | -1.119024 | 1.253983  | -1.393703 |
| H  | -1.264533 | -1.856056 | 3.126776  |
| H  | 0.442629  | -1.384155 | 3.283740  |
| H  | -2.183758 | 1.085379  | -1.667090 |
| C  | -0.047902 | -2.369105 | 0.629871  |
| H  | 0.146902  | -3.287684 | 1.203849  |
| C  | 0.014393  | -2.357220 | -0.770160 |
| H  | 0.276280  | -3.270883 | -1.325758 |
| C  | -0.295635 | -1.168983 | -1.461634 |
| H  | -0.305034 | -1.141061 | -2.561541 |
| Ru | -0.853054 | 1.691190  | 1.825961  |
| C  | -1.191210 | 0.336660  | 4.646519  |
| H  | -0.374801 | -0.141938 | 5.245997  |
| H  | -1.211888 | 1.407195  | 4.934413  |
| C  | -2.523372 | -0.311689 | 5.017592  |
| C  | -3.712299 | 0.161543  | 4.420315  |
| C  | -2.600629 | -1.396055 | 5.912848  |
| C  | -4.949258 | -0.427627 | 4.722714  |
| C  | -3.839152 | -1.994321 | 6.215821  |
| C  | -5.016543 | -1.510520 | 5.621995  |
| H  | -3.646930 | 0.996025  | 3.701674  |
| H  | -1.676291 | -1.776460 | 6.380346  |
| H  | -5.870048 | -0.041829 | 4.255735  |
| H  | -3.882011 | -2.843908 | 6.916551  |
| H  | -5.987257 | -1.976123 | 5.856682  |
| H  | 0.637215  | 2.182180  | 1.688495  |
| C  | -1.173894 | 3.205658  | 2.832916  |
| O  | -1.384405 | 4.202383  | 3.426978  |
| P  | -1.088452 | 2.717740  | -0.201693 |
| C  | -2.643786 | 3.724143  | -0.629814 |
| H  | -2.306207 | 4.774810  | -0.476206 |
| C  | 0.341304  | 3.782718  | -0.856622 |
| H  | 0.443731  | 4.536258  | -0.041866 |
| C  | 1.630249  | 2.943799  | -0.901387 |
| H  | 2.509664  | 3.596849  | -1.085225 |
| H  | 1.797456  | 2.397735  | 0.049243  |
| H  | 1.599227  | 2.196953  | -1.724245 |
| C  | 0.117499  | 4.514815  | -2.188448 |
| H  | 1.014232  | 5.121031  | -2.442019 |
| H  | -0.033685 | 3.801834  | -3.028043 |
| H  | -0.747298 | 5.207262  | -2.163009 |
| C  | -3.155134 | 3.568325  | -2.074047 |
| H  | -2.364744 | 3.681216  | -2.840583 |
| H  | -3.629736 | 2.574848  | -2.222461 |
| H  | -3.938269 | 4.327827  | -2.285068 |
| C  | -3.766252 | 3.423246  | 0.378504  |

|   |           |          |          |
|---|-----------|----------|----------|
| H | -4.053669 | 2.350020 | 0.347612 |
| H | -3.462805 | 3.651637 | 1.418196 |
| H | -4.669223 | 4.024635 | 0.136027 |

57

TS-EF-PiPr SCF Done: -1440.42732225 A.U.

Number of imaginary frequencies = 1

Imaginary frequency = -927.70 cm<sup>-1</sup>

|    |           |           |           |
|----|-----------|-----------|-----------|
| C  | -0.468520 | 0.100507  | -0.677149 |
| H  | -0.665715 | 1.261977  | -2.513121 |
| N  | -1.343315 | 0.557825  | 3.222314  |
| C  | -0.204283 | -0.314808 | 2.995196  |
| C  | -0.061512 | -0.663391 | 1.533085  |
| N  | -0.554413 | 0.264991  | 0.672535  |
| C  | -1.153908 | 1.146411  | -1.524674 |
| H  | -2.487699 | 0.702566  | 2.322111  |
| H  | -0.254740 | -1.251429 | 3.603135  |
| H  | 0.756706  | 0.198295  | 3.293180  |
| H  | -2.196279 | 0.805125  | -1.717607 |
| C  | 0.573720  | -1.819123 | 1.048400  |
| H  | 0.959648  | -2.565475 | 1.758495  |
| C  | 0.713596  | -1.989977 | -0.337440 |
| H  | 1.222119  | -2.880025 | -0.739786 |
| C  | 0.187233  | -1.021735 | -1.210349 |
| H  | 0.265668  | -1.139092 | -2.301406 |
| Ru | -1.409875 | 1.985451  | 1.571944  |
| C  | -1.452895 | 1.029140  | 4.591307  |
| H  | -0.553563 | 1.628894  | 4.893116  |
| H  | -2.313808 | 1.732867  | 4.636573  |
| C  | -1.676029 | -0.086974 | 5.609379  |
| C  | -2.561133 | -1.147459 | 5.317416  |
| C  | -1.020216 | -0.081290 | 6.856832  |
| C  | -2.790743 | -2.170471 | 6.251748  |
| C  | -1.251495 | -1.100237 | 7.798648  |
| C  | -2.137965 | -2.149252 | 7.498713  |
| H  | -3.058321 | -1.161440 | 4.333515  |
| H  | -0.316302 | 0.735152  | 7.091620  |
| H  | -3.485091 | -2.990988 | 6.007484  |
| H  | -0.730539 | -1.078167 | 8.769617  |
| H  | -2.317161 | -2.951191 | 8.232786  |
| H  | 0.108320  | 2.545390  | 1.769741  |
| C  | -1.978037 | 3.562569  | 2.353007  |
| O  | -2.294756 | 4.596006  | 2.816952  |
| P  | -1.347945 | 2.759395  | -0.567246 |
| H  | -3.030254 | 1.100823  | 1.575205  |
| C  | 0.166491  | 3.801405  | -1.012933 |
| H  | 0.909113  | 3.346902  | -0.320697 |
| C  | 0.725772  | 3.711813  | -2.440976 |
| H  | 0.970650  | 2.670649  | -2.735435 |
| H  | 0.034314  | 4.127738  | -3.200723 |
| H  | 1.669994  | 4.294860  | -2.505749 |

|   |           |          |           |
|---|-----------|----------|-----------|
| C | -0.069157 | 5.251249 | -0.556138 |
| H | 0.885261  | 5.819128 | -0.568833 |
| H | -0.776356 | 5.783063 | -1.228156 |
| H | -0.472090 | 5.293216 | 0.477444  |
| C | -2.843310 | 3.590988 | -1.357001 |
| H | -2.846959 | 4.584016 | -0.852856 |
| C | -4.133230 | 2.857871 | -0.951969 |
| H | -4.197356 | 1.850788 | -1.418881 |
| H | -4.198365 | 2.722405 | 0.145576  |
| H | -5.019481 | 3.433699 | -1.293943 |
| C | -2.758227 | 3.800747 | -2.877554 |
| H | -1.925257 | 4.470040 | -3.167445 |
| H | -2.629100 | 2.839002 | -3.418778 |
| H | -3.697205 | 4.261888 | -3.252897 |

37

A-PH SCF Done: -1203.26739703 A.U.

Number of imaginary frequencies = 0

|    |           |           |           |
|----|-----------|-----------|-----------|
| C  | -1.060379 | -0.200769 | -0.727351 |
| H  | -0.584329 | 1.627713  | -1.736061 |
| N  | -1.256562 | 0.392126  | 3.206518  |
| C  | -0.637953 | -0.881181 | 2.885559  |
| C  | -0.604786 | -1.136216 | 1.404884  |
| N  | -1.009846 | -0.088755 | 0.635578  |
| C  | -1.491477 | 1.035123  | -1.479932 |
| H  | -1.170563 | -1.731211 | 3.383976  |
| H  | 0.416364  | -0.937166 | 3.271909  |
| H  | -2.004307 | 0.784233  | -2.430428 |
| C  | -0.216025 | -2.353775 | 0.821003  |
| H  | 0.106055  | -3.185722 | 1.465180  |
| C  | -0.265769 | -2.488493 | -0.572969 |
| H  | 0.022239  | -3.436631 | -1.052690 |
| C  | -0.698213 | -1.400388 | -1.355155 |
| H  | -0.750840 | -1.477038 | -2.451330 |
| Ru | -1.648282 | 1.623560  | 1.692769  |
| C  | -1.366605 | 0.598740  | 4.647729  |
| H  | -0.381920 | 0.438553  | 5.156205  |
| H  | -1.646702 | 1.655831  | 4.828312  |
| C  | -2.408772 | -0.316115 | 5.286458  |
| C  | -3.731751 | -0.311531 | 4.792746  |
| C  | -2.083340 | -1.185785 | 6.345626  |
| C  | -4.707447 | -1.149505 | 5.354442  |
| C  | -3.058665 | -2.028896 | 6.911324  |
| C  | -4.373606 | -2.012208 | 6.416884  |
| H  | -3.979370 | 0.355165  | 3.949932  |
| H  | -1.050278 | -1.201964 | 6.732930  |
| H  | -5.737670 | -1.130598 | 4.963450  |
| H  | -2.787590 | -2.704074 | 7.739069  |
| H  | -5.139117 | -2.671574 | 6.856520  |
| H  | -0.463989 | 2.538677  | 1.155492  |
| C  | -2.279563 | 3.090732  | 2.636429  |

|   |           |          |           |
|---|-----------|----------|-----------|
| O | -2.676654 | 4.036220 | 3.209513  |
| P | -2.489036 | 2.164582 | -0.338446 |
| H | -3.844769 | 1.887094 | -0.758169 |
| H | -2.363291 | 3.404084 | -1.059752 |

39

TS-EF-PH SCF Done: -1204.42528828 A.U.

Number of imaginary frequencies = 1

Imaginary frequency = -968.52 cm<sup>-1</sup>

|    |           |           |           |
|----|-----------|-----------|-----------|
| C  | -0.562484 | 0.084554  | -0.702558 |
| H  | -0.612993 | 1.348358  | -2.477866 |
| N  | -1.322187 | 0.543693  | 3.227506  |
| C  | -0.234382 | -0.381161 | 2.956642  |
| C  | -0.157193 | -0.724905 | 1.489376  |
| N  | -0.625554 | 0.235231  | 0.649053  |
| C  | -1.184936 | 1.177766  | -1.542932 |
| H  | -2.490800 | 0.712139  | 2.385449  |
| H  | -0.312714 | -1.315738 | 3.563434  |
| H  | 0.758672  | 0.083334  | 3.224959  |
| H  | -2.206340 | 0.853655  | -1.843220 |
| C  | 0.404991  | -1.907544 | 0.981637  |
| H  | 0.767434  | -2.678878 | 1.677136  |
| C  | 0.505048  | -2.073145 | -0.408164 |
| H  | 0.954958  | -2.985677 | -0.829286 |
| C  | 0.020018  | -1.066412 | -1.259820 |
| H  | 0.077488  | -1.172486 | -2.353317 |
| Ru | -1.401938 | 1.971893  | 1.595158  |
| C  | -1.364760 | 1.005964  | 4.606004  |
| H  | -0.434126 | 1.569812  | 4.877022  |
| H  | -2.199656 | 1.736277  | 4.690398  |
| C  | -1.586525 | -0.118360 | 5.613415  |
| C  | -2.572151 | -1.100267 | 5.371952  |
| C  | -0.826001 | -0.202828 | 6.796657  |
| C  | -2.796897 | -2.134641 | 6.294560  |
| C  | -1.051412 | -1.233942 | 7.726858  |
| C  | -2.037938 | -2.203757 | 7.478266  |
| H  | -3.154625 | -1.046076 | 4.437560  |
| H  | -0.044764 | 0.551559  | 6.990226  |
| H  | -3.571042 | -2.892460 | 6.091557  |
| H  | -0.448099 | -1.283205 | 8.647752  |
| H  | -2.213709 | -3.014566 | 8.203282  |
| H  | 0.138762  | 2.486792  | 1.723226  |
| C  | -1.889185 | 3.527584  | 2.482977  |
| O  | -2.153148 | 4.521633  | 3.045487  |
| P  | -1.421474 | 2.756632  | -0.525091 |
| H  | -3.050303 | 1.141581  | 1.662184  |
| H  | -0.401361 | 3.611890  | -1.071490 |
| H  | -2.520970 | 3.343502  | -1.243821 |

43

A-PCF3 SCF Done: -1877.65259171 A.U.

Number of imaginary frequencies = 0

|    |           |           |           |
|----|-----------|-----------|-----------|
| C  | -0.643407 | -0.156192 | -0.644548 |
| H  | 0.234760  | 1.543026  | -1.634571 |
| N  | -0.870523 | 0.245851  | 3.310335  |
| C  | -0.564298 | -1.120519 | 2.926597  |
| C  | -0.511851 | -1.290236 | 1.434578  |
| N  | -0.620257 | -0.135301 | 0.723301  |
| C  | -0.774287 | 1.181163  | -1.334776 |
| H  | -1.319527 | -1.835874 | 3.341094  |
| H  | 0.418440  | -1.456597 | 3.354554  |
| H  | -1.390777 | 1.129284  | -2.254405 |
| C  | -0.390891 | -2.529811 | 0.783934  |
| H  | -0.304665 | -3.449834 | 1.381200  |
| C  | -0.403967 | -2.569011 | -0.616428 |
| H  | -0.322111 | -3.529180 | -1.148551 |
| C  | -0.539892 | -1.368161 | -1.338637 |
| H  | -0.566555 | -1.368172 | -2.438244 |
| Ru | -0.869347 | 1.617291  | 1.878433  |
| C  | -1.046531 | 0.388634  | 4.753875  |
| H  | -0.190433 | -0.067813 | 5.310965  |
| H  | -1.045955 | 1.468901  | 5.001381  |
| C  | -2.350401 | -0.242839 | 5.234628  |
| C  | -3.573471 | 0.172164  | 4.663983  |
| C  | -2.366534 | -1.252111 | 6.216982  |
| C  | -4.785460 | -0.402616 | 5.076359  |
| C  | -3.580210 | -1.832180 | 6.632461  |
| C  | -4.792414 | -1.408199 | 6.062827  |
| H  | -3.558986 | 0.948191  | 3.880588  |
| H  | -1.414991 | -1.587313 | 6.663734  |
| H  | -5.733072 | -0.064529 | 4.627001  |
| H  | -3.576597 | -2.621087 | 7.401817  |
| H  | -5.743775 | -1.861007 | 6.384916  |
| H  | 0.563052  | 2.199993  | 1.526613  |
| C  | -1.176076 | 3.141312  | 2.902869  |
| O  | -1.361591 | 4.115244  | 3.526619  |
| P  | -1.400732 | 2.449766  | -0.105739 |
| C  | -0.746518 | 4.053087  | -0.937943 |
| F  | -1.342208 | 5.140064  | -0.404549 |
| F  | 0.586898  | 4.142208  | -0.719967 |
| F  | -0.939287 | 4.078533  | -2.281244 |
| C  | -3.242487 | 2.592389  | -0.649429 |
| F  | -3.894092 | 3.527226  | 0.071381  |
| F  | -3.418752 | 2.872125  | -1.965404 |
| F  | -3.825120 | 1.387109  | -0.410575 |

45

TS-EF-PCF3 SCF Done: -1878.80821043 A.U.

Number of imaginary frequencies = 1

Imaginary frequency = -943.40 cm<sup>-1</sup>

|   |           |          |           |
|---|-----------|----------|-----------|
| C | -0.530117 | 0.158439 | -0.653646 |
| H | -0.453225 | 1.524862 | -2.362284 |



|    |           |           |           |
|----|-----------|-----------|-----------|
| N  | -1.335538 | 0.561735  | 3.278303  |
| C  | -0.259800 | -0.375190 | 3.000503  |
| C  | -0.176043 | -0.698147 | 1.529406  |
| N  | -0.620097 | 0.282183  | 0.699504  |
| C  | -1.091186 | 1.290014  | -1.486337 |
| H  | -2.515908 | 0.743104  | 2.429319  |
| H  | -0.358546 | -1.315428 | 3.594424  |
| H  | 0.739311  | 0.068073  | 3.281357  |
| H  | -2.087296 | 0.996865  | -1.885759 |
| C  | 0.375028  | -1.879797 | 1.007505  |
| H  | 0.717377  | -2.668357 | 1.693655  |
| C  | 0.490914  | -2.022599 | -0.383365 |
| H  | 0.931163  | -2.934980 | -0.814587 |
| C  | 0.039409  | -0.991307 | -1.223851 |
| H  | 0.117009  | -1.075227 | -2.317846 |
| Ru | -1.400966 | 2.006200  | 1.667266  |
| C  | -1.373647 | 1.012346  | 4.662582  |
| H  | -0.438673 | 1.566252  | 4.937433  |
| H  | -2.204544 | 1.746020  | 4.754821  |
| C  | -1.601274 | -0.124532 | 5.653219  |
| C  | -2.625924 | -1.067976 | 5.420515  |
| C  | -0.804450 | -0.263124 | 6.806882  |
| C  | -2.853000 | -2.118404 | 6.323978  |
| C  | -1.031865 | -1.310938 | 7.717887  |
| C  | -2.056963 | -2.242143 | 7.478636  |
| H  | -3.238456 | -0.971881 | 4.509001  |
| H  | 0.006420  | 0.461228  | 6.992692  |
| H  | -3.658038 | -2.845454 | 6.129302  |
| H  | -0.400342 | -1.403153 | 8.616181  |
| H  | -2.234760 | -3.065492 | 8.188776  |
| H  | 0.136945  | 2.499858  | 1.842410  |
| C  | -1.888832 | 3.558719  | 2.575127  |
| O  | -2.149590 | 4.546386  | 3.143202  |
| P  | -1.383908 | 2.793953  | -0.402115 |
| H  | -3.059399 | 1.188202  | 1.724656  |
| C  | 0.013995  | 3.951919  | -1.025672 |
| F  | 0.026744  | 5.111080  | -0.341158 |
| F  | 1.197132  | 3.319575  | -0.826670 |
| F  | -0.072913 | 4.241668  | -2.349545 |
| C  | -2.857965 | 3.592296  | -1.337491 |
| F  | -2.993207 | 4.888928  | -0.989540 |
| F  | -2.740431 | 3.523252  | -2.687591 |
| F  | -3.989550 | 2.932803  | -0.996480 |

45

A-POMe SCF Done: -1432.49038997 A.U.

Number of imaginary frequencies = 0

|   |           |           |           |
|---|-----------|-----------|-----------|
| C | -0.633995 | -0.602783 | -0.804187 |
| H | 0.217589  | 1.074376  | -1.859837 |
| N | -0.801503 | 0.040456  | 3.123258  |
| C | -0.555636 | -1.356914 | 2.820593  |

|    |           |           |           |
|----|-----------|-----------|-----------|
| C  | -0.492692 | -1.612044 | 1.340106  |
| N  | -0.597173 | -0.501418 | 0.561178  |
| C  | -0.784759 | 0.694223  | -1.559010 |
| H  | -1.350727 | -2.016957 | 3.254923  |
| H  | 0.401870  | -1.716131 | 3.285445  |
| H  | -1.398424 | 0.586593  | -2.475897 |
| C  | -0.377891 | -2.888738 | 0.764946  |
| H  | -0.292560 | -3.771569 | 1.416238  |
| C  | -0.398247 | -3.011849 | -0.631042 |
| H  | -0.320550 | -4.002744 | -1.104626 |
| C  | -0.538011 | -1.856476 | -1.422783 |
| H  | -0.574703 | -1.922064 | -2.520136 |
| Ru | -0.815438 | 1.330369  | 1.599878  |
| C  | -1.016856 | 0.266090  | 4.548941  |
| H  | -0.207023 | -0.207430 | 5.159249  |
| H  | -0.961308 | 1.356575  | 4.742011  |
| C  | -2.368484 | -0.263680 | 5.025147  |
| C  | -3.549452 | 0.157263  | 4.375654  |
| C  | -2.470742 | -1.181502 | 6.088769  |
| C  | -4.802529 | -0.320805 | 4.788827  |
| C  | -3.725561 | -1.665030 | 6.505625  |
| C  | -4.894924 | -1.235127 | 5.856441  |
| H  | -3.466421 | 0.858330  | 3.528144  |
| H  | -1.553233 | -1.522052 | 6.598406  |
| H  | -5.716197 | 0.021138  | 4.276114  |
| H  | -3.787804 | -2.384078 | 7.338423  |
| H  | -5.878472 | -1.612791 | 6.178930  |
| H  | 0.564075  | 1.928455  | 1.076355  |
| C  | -1.127335 | 2.922161  | 2.496649  |
| O  | -1.325692 | 3.951721  | 3.029225  |
| P  | -1.459899 | 2.000426  | -0.411359 |
| O  | -1.062939 | 3.434155  | -1.169116 |
| C  | 0.072639  | 4.185995  | -0.729055 |
| H  | 0.034918  | 4.397023  | 0.361649  |
| H  | 1.029216  | 3.660485  | -0.950336 |
| H  | 0.055336  | 5.143731  | -1.286696 |
| O  | -3.053705 | 1.939382  | -0.889089 |
| C  | -3.991921 | 2.721993  | -0.138053 |
| H  | -3.853259 | 2.573726  | 0.957963  |
| H  | -3.888227 | 3.804295  | -0.372727 |
| H  | -5.006882 | 2.383753  | -0.425126 |

47

TS-EF-POMe SCF Done: -1433.64694990 A.U.

Number of imaginary frequencies = 1

Imaginary frequency = -816.91 cm<sup>-1</sup>

|   |           |           |           |
|---|-----------|-----------|-----------|
| C | -0.273145 | -0.250652 | -0.808566 |
| H | 0.467217  | 1.331170  | -2.070453 |
| N | -1.245139 | 0.352725  | 3.091215  |
| C | -0.252208 | -0.679265 | 2.872060  |
| C | -0.154643 | -1.066110 | 1.416744  |

|    |           |           |           |
|----|-----------|-----------|-----------|
| N  | -0.452856 | -0.077108 | 0.531240  |
| C  | -0.508584 | 0.947791  | -1.698708 |
| H  | -2.427560 | 0.546973  | 2.171954  |
| H  | -0.434682 | -1.588159 | 3.496370  |
| H  | 0.779943  | -0.316784 | 3.156887  |
| H  | -1.123171 | 0.700382  | -2.588621 |
| C  | 0.280261  | -2.322559 | 0.964496  |
| H  | 0.496207  | -3.116298 | 1.694772  |
| C  | 0.435429  | -2.536962 | -0.413493 |
| H  | 0.771094  | -3.515623 | -0.790567 |
| C  | 0.168731  | -1.487906 | -1.307931 |
| H  | 0.302718  | -1.617165 | -2.392047 |
| Ru | -1.251200 | 1.708795  | 1.372086  |
| C  | -1.237054 | 0.890713  | 4.440071  |
| H  | -0.257785 | 1.384077  | 4.682371  |
| H  | -2.001717 | 1.697691  | 4.487647  |
| C  | -1.553235 | -0.146331 | 5.515346  |
| C  | -2.591697 | -1.081542 | 5.314236  |
| C  | -0.832167 | -0.190174 | 6.725332  |
| C  | -2.906418 | -2.029782 | 6.301032  |
| C  | -1.147416 | -1.134177 | 7.719545  |
| C  | -2.186161 | -2.057827 | 7.510235  |
| H  | -3.142076 | -1.059731 | 4.359192  |
| H  | -0.009954 | 0.527021  | 6.888861  |
| H  | -3.720453 | -2.752481 | 6.127936  |
| H  | -0.573514 | -1.152403 | 8.660224  |
| H  | -2.432055 | -2.801166 | 8.285466  |
| H  | 0.288811  | 2.213957  | 1.520383  |
| C  | -1.759610 | 3.324344  | 2.130981  |
| O  | -2.029418 | 4.368877  | 2.591858  |
| P  | -1.302877 | 2.347565  | -0.749455 |
| H  | -2.923521 | 0.922438  | 1.424407  |
| O  | -0.564054 | 3.709851  | -1.365040 |
| C  | 0.442126  | 4.391499  | -0.604788 |
| H  | 0.081741  | 4.660511  | 0.411156  |
| H  | 1.364092  | 3.778254  | -0.494706 |
| H  | 0.687334  | 5.315797  | -1.164800 |
| O  | -2.713571 | 2.435783  | -1.621843 |
| C  | -3.726325 | 3.330443  | -1.137877 |
| H  | -3.959258 | 3.130300  | -0.067373 |
| H  | -3.411930 | 4.391168  | -1.251923 |
| H  | -4.633871 | 3.153998  | -1.747414 |

61

A-pyr-F SCF Done: -1617.20716478 A.U.

Number of imaginary frequencies = 0

|   |           |           |           |
|---|-----------|-----------|-----------|
| C | -0.482112 | -0.319178 | -0.648840 |
| H | -0.328096 | 1.025904  | -2.361843 |
| N | -1.001458 | 0.247749  | 3.250457  |
| C | -0.629456 | -1.120731 | 2.959273  |
| C | -0.394244 | -1.342186 | 1.489741  |

|    |           |           |           |
|----|-----------|-----------|-----------|
| N  | -0.539215 | -0.231480 | 0.714400  |
| C  | -0.900294 | 0.909103  | -1.419385 |
| H  | -1.413025 | -1.850153 | 3.294787  |
| H  | 0.299335  | -1.423760 | 3.515538  |
| H  | -1.959260 | 0.752782  | -1.720920 |
| C  | -0.078497 | -2.588748 | 0.925395  |
| H  | 0.051382  | -3.485282 | 1.547748  |
| C  | 0.062808  | -2.657839 | -0.463524 |
| C  | -0.157013 | -1.529577 | -1.272921 |
| H  | -0.097793 | -1.614764 | -2.366849 |
| Ru | -0.774600 | 1.581428  | 1.770075  |
| C  | -1.323522 | 0.448531  | 4.656735  |
| H  | -0.539268 | 0.010161  | 5.326469  |
| H  | -1.339219 | 1.538818  | 4.857948  |
| C  | -2.679418 | -0.151064 | 5.024381  |
| C  | -3.831724 | 0.262815  | 4.320706  |
| C  | -2.813975 | -1.132177 | 6.025679  |
| C  | -5.089208 | -0.282243 | 4.621388  |
| C  | -4.073139 | -1.685510 | 6.328550  |
| C  | -5.213917 | -1.260959 | 5.627479  |
| H  | -3.719985 | 1.014491  | 3.521203  |
| H  | -1.918428 | -1.467069 | 6.576552  |
| H  | -5.981011 | 0.056625  | 4.069485  |
| H  | -4.160796 | -2.454302 | 7.113330  |
| H  | -6.200501 | -1.692228 | 5.861467  |
| C  | 0.678402  | 3.408020  | -1.006488 |
| C  | -2.494625 | 3.360375  | -0.881976 |
| C  | -3.634349 | 2.593711  | -0.170446 |
| H  | -3.682051 | 1.525935  | -0.473550 |
| H  | -3.514554 | 2.620776  | 0.931512  |
| H  | -4.610134 | 3.058522  | -0.432847 |
| C  | -2.771237 | 3.363026  | -2.399951 |
| H  | -2.023909 | 3.938618  | -2.975410 |
| H  | -2.819598 | 2.339591  | -2.826418 |
| H  | -3.761939 | 3.833152  | -2.587005 |
| C  | -2.460687 | 4.806137  | -0.344525 |
| H  | -3.463235 | 5.270801  | -0.469478 |
| H  | -2.208299 | 4.840076  | 0.735044  |
| H  | -1.736368 | 5.440253  | -0.894383 |
| C  | 0.527421  | 3.982589  | -2.426426 |
| H  | 1.504634  | 4.393348  | -2.764075 |
| H  | 0.224224  | 3.212675  | -3.166967 |
| H  | -0.204730 | 4.813134  | -2.467850 |
| C  | 1.013214  | 4.536670  | -0.007031 |
| H  | 0.220913  | 5.308204  | 0.045185  |
| H  | 1.162215  | 4.135139  | 1.014978  |
| H  | 1.952647  | 5.041746  | -0.321426 |
| C  | 1.838711  | 2.384807  | -0.998536 |
| H  | 1.923774  | 1.873290  | -0.017421 |
| H  | 1.732234  | 1.611126  | -1.786835 |
| H  | 2.795855  | 2.916575  | -1.190453 |

|   |           |           |           |
|---|-----------|-----------|-----------|
| H | 0.748491  | 1.968930  | 1.679974  |
| C | -1.057620 | 3.173606  | 2.656735  |
| O | -1.234616 | 4.216284  | 3.180072  |
| P | -0.871760 | 2.464332  | -0.344411 |
| F | 0.380039  | -3.827420 | -1.042964 |

63

TS-EF-pyr-F SCF Done: -1618.40877790 A.U.

Number of imaginary frequencies = 1

Imaginary frequency = -941.16 cm<sup>-1</sup>

|    |           |           |           |
|----|-----------|-----------|-----------|
| C  | -0.964714 | -0.163005 | -0.874552 |
| H  | -0.514145 | 1.124548  | -2.574710 |
| N  | -2.374478 | 0.240586  | 2.892632  |
| C  | -1.387944 | -0.858417 | 2.729707  |
| C  | -1.144921 | -1.149931 | 1.269682  |
| N  | -1.245963 | -0.064187 | 0.457218  |
| C  | -1.180456 | 1.085307  | -1.688621 |
| H  | -3.303916 | -0.097574 | 2.600862  |
| H  | -1.672149 | -1.778165 | 3.287864  |
| H  | -0.431236 | -0.473366 | 3.154977  |
| H  | -2.229890 | 1.067900  | -2.059021 |
| C  | -0.758369 | -2.404497 | 0.780150  |
| H  | -0.681846 | -3.284092 | 1.434504  |
| C  | -0.445866 | -2.499423 | -0.583498 |
| C  | -0.540967 | -1.382604 | -1.425836 |
| H  | -0.303260 | -1.475958 | -2.494602 |
| Ru | -1.842512 | 1.739488  | 1.357278  |
| C  | -2.469093 | 0.736213  | 4.295291  |
| H  | -1.484837 | 1.184546  | 4.540393  |
| H  | -3.209402 | 1.560617  | 4.286474  |
| C  | -2.864021 | -0.341712 | 5.286104  |
| C  | -4.205678 | -0.777085 | 5.359130  |
| C  | -1.900406 | -0.978157 | 6.096432  |
| C  | -4.575164 | -1.825317 | 6.218007  |
| C  | -2.266283 | -2.025668 | 6.959850  |
| C  | -3.604430 | -2.452982 | 7.020380  |
| H  | -4.971503 | -0.279156 | 4.739933  |
| H  | -0.850747 | -0.643771 | 6.048963  |
| H  | -5.626755 | -2.149726 | 6.268462  |
| H  | -1.503067 | -2.509756 | 7.589818  |
| H  | -3.893105 | -3.272527 | 7.697424  |
| C  | 0.762146  | 3.124353  | -0.645483 |
| C  | -2.164464 | 3.896809  | -1.576250 |
| C  | -3.651601 | 3.562513  | -1.323164 |
| H  | -3.915851 | 2.534050  | -1.644299 |
| H  | -3.915463 | 3.641161  | -0.252303 |
| H  | -4.279211 | 4.273384  | -1.905044 |
| C  | -1.913179 | 3.860010  | -3.100177 |
| H  | -0.871702 | 4.098950  | -3.380141 |
| H  | -2.174181 | 2.877393  | -3.544198 |
| H  | -2.566294 | 4.615426  | -3.590244 |

|   |           |           |           |
|---|-----------|-----------|-----------|
| C | -1.881707 | 5.308269  | -1.017707 |
| H | -2.606991 | 6.027513  | -1.457319 |
| H | -2.002480 | 5.344521  | 0.084405  |
| H | -0.866103 | 5.670586  | -1.273504 |
| C | 1.246675  | 3.683807  | -1.995180 |
| H | 2.347645  | 3.838352  | -1.951055 |
| H | 1.051087  | 2.988259  | -2.838511 |
| H | 0.793144  | 4.665091  | -2.237805 |
| C | 1.016311  | 4.144837  | 0.485125  |
| H | 0.503018  | 5.110404  | 0.311566  |
| H | 0.672443  | 3.736941  | 1.457589  |
| H | 2.106695  | 4.352992  | 0.554341  |
| C | 1.560693  | 1.838771  | -0.325707 |
| H | 1.195149  | 1.368599  | 0.610808  |
| H | 1.516604  | 1.094745  | -1.148126 |
| H | 2.630960  | 2.103930  | -0.182460 |
| H | -0.339730 | 1.798423  | 2.162325  |
| C | -2.349822 | 3.336817  | 2.128446  |
| O | -2.666429 | 4.371585  | 2.600151  |
| P | -1.108944 | 2.623113  | -0.586707 |
| H | -3.375110 | 1.468336  | 0.696022  |
| F | -0.054547 | -3.680489 | -1.092232 |

65

A-pyr-OMe SCF Done: -1632.50320703 A.U.

Number of imaginary frequencies = 0

|    |           |           |           |
|----|-----------|-----------|-----------|
| C  | -0.617246 | -0.239347 | -0.778105 |
| H  | -0.401091 | 1.086724  | -2.504318 |
| N  | -1.287273 | 0.343132  | 3.088287  |
| C  | -0.852404 | -1.017566 | 2.823841  |
| C  | -0.604748 | -1.254567 | 1.357341  |
| N  | -0.710283 | -0.140395 | 0.577255  |
| C  | -0.981986 | 0.998297  | -1.563697 |
| H  | -1.597070 | -1.774149 | 3.182221  |
| H  | 0.093484  | -1.260190 | 3.381906  |
| H  | -2.046522 | 0.886763  | -1.866022 |
| C  | -0.307540 | -2.502042 | 0.802939  |
| H  | -0.214776 | -3.397921 | 1.433318  |
| C  | -0.122588 | -2.610305 | -0.591794 |
| C  | -0.302630 | -1.457839 | -1.395322 |
| H  | -0.229510 | -1.495982 | -2.490005 |
| Ru | -0.948554 | 1.678656  | 1.623913  |
| C  | -1.533585 | 0.566399  | 4.504604  |
| H  | -0.640324 | 0.295806  | 5.127635  |
| H  | -1.701864 | 1.652171  | 4.660676  |
| C  | -2.745778 | -0.197421 | 5.038957  |
| C  | -3.931485 | -0.259916 | 4.275177  |
| C  | -2.717712 | -0.836128 | 6.294849  |
| C  | -5.062561 | -0.936070 | 4.760259  |
| C  | -3.849704 | -1.511575 | 6.786630  |
| C  | -5.026748 | -1.563725 | 6.020024  |

|   |           |           |           |
|---|-----------|-----------|-----------|
| H | -3.940303 | 0.223473  | 3.284277  |
| H | -1.792651 | -0.804352 | 6.895609  |
| H | -5.981267 | -0.974295 | 4.152284  |
| H | -3.809165 | -2.005816 | 7.770948  |
| H | -5.913347 | -2.095965 | 6.400627  |
| C | 0.746231  | 3.381248  | -1.088637 |
| C | -2.422247 | 3.561360  | -1.117762 |
| C | -3.647627 | 2.893756  | -0.450349 |
| H | -3.761210 | 1.828000  | -0.742986 |
| H | -3.576688 | 2.929052  | 0.655502  |
| H | -4.572913 | 3.425794  | -0.763605 |
| C | -2.628895 | 3.560732  | -2.646795 |
| H | -1.811741 | 4.064399  | -3.194204 |
| H | -2.739862 | 2.536864  | -3.060259 |
| H | -3.568786 | 4.105592  | -2.886708 |
| C | -2.303153 | 5.008396  | -0.596027 |
| H | -3.261128 | 5.545447  | -0.771199 |
| H | -2.096515 | 5.038643  | 0.493476  |
| H | -1.509027 | 5.577739  | -1.119801 |
| C | 0.706291  | 3.953462  | -2.516894 |
| H | 1.725323  | 4.292749  | -2.807656 |
| H | 0.387291  | 3.200192  | -3.267972 |
| H | 0.036684  | 4.832564  | -2.599120 |
| C | 1.115360  | 4.490868  | -0.080183 |
| H | 0.380370  | 5.318727  | -0.071011 |
| H | 1.183547  | 4.088122  | 0.950024  |
| H | 2.103895  | 4.922779  | -0.350491 |
| C | 1.826266  | 2.275659  | -1.019422 |
| H | 1.827984  | 1.770813  | -0.031259 |
| H | 1.697011  | 1.502245  | -1.804660 |
| H | 2.828142  | 2.732948  | -1.172012 |
| H | 0.591834  | 1.998183  | 1.629435  |
| C | -1.204915 | 3.282169  | 2.497009  |
| O | -1.358151 | 4.333934  | 3.010678  |
| P | -0.897905 | 2.555346  | -0.494924 |
| O | 0.193318  | -3.840068 | -1.066041 |
| C | 0.380721  | -4.010420 | -2.467425 |
| H | 0.644449  | -5.074222 | -2.616624 |
| H | -0.548053 | -3.784545 | -3.038985 |
| H | 1.208800  | -3.373753 | -2.853407 |

67

TS-EF-pyr-OMe SCF Done: -1633.66046326 A.U.

Number of imaginary frequencies = 1

Imaginary frequency = -924.70 cm<sup>-1</sup>

|   |           |           |           |
|---|-----------|-----------|-----------|
| C | -0.508335 | 0.024909  | -0.621261 |
| H | -0.678364 | 1.162041  | -2.476135 |
| N | -1.266567 | 0.607483  | 3.275688  |
| C | -0.191950 | -0.343648 | 3.049506  |
| C | -0.099557 | -0.726260 | 1.592340  |
| N | -0.546748 | 0.219265  | 0.725649  |

|    |           |           |           |
|----|-----------|-----------|-----------|
| C  | -1.141343 | 1.100680  | -1.469920 |
| H  | -2.411117 | 0.815841  | 2.388090  |
| H  | -0.296025 | -1.262282 | 3.677333  |
| H  | 0.805968  | 0.109463  | 3.323110  |
| H  | -2.209595 | 0.828570  | -1.621561 |
| C  | 0.445158  | -1.930198 | 1.115501  |
| H  | 0.797782  | -2.688151 | 1.830580  |
| C  | 0.538045  | -2.134452 | -0.270015 |
| H  | 0.975883  | -3.063561 | -0.667217 |
| C  | 0.054588  | -1.149301 | -1.148401 |
| H  | 0.096822  | -1.290491 | -2.238604 |
| Ru | -1.250186 | 2.013376  | 1.611179  |
| C  | -1.329011 | 1.101401  | 4.642005  |
| H  | -0.390203 | 1.648654  | 4.922321  |
| H  | -2.144992 | 1.856537  | 4.685916  |
| C  | -1.596519 | 0.005463  | 5.668478  |
| C  | -2.611823 | -0.944849 | 5.446842  |
| C  | -0.845464 | -0.098493 | 6.859010  |
| C  | -2.887867 | -1.963249 | 6.375904  |
| C  | -1.106321 | -1.101605 | 7.800947  |
| C  | -2.132775 | -2.043994 | 7.567844  |
| H  | -3.191371 | -0.889545 | 4.510500  |
| H  | -0.035489 | 0.625367  | 7.051071  |
| H  | -3.690349 | -2.683727 | 6.162530  |
| H  | -0.523071 | -1.185239 | 8.730674  |
| C  | 0.454079  | 3.606071  | -1.122341 |
| C  | -2.710448 | 3.627366  | -1.330496 |
| C  | -3.954963 | 3.003165  | -0.659693 |
| H  | -4.868895 | 3.465041  | -1.093351 |
| H  | -4.023253 | 1.907380  | -0.824903 |
| H  | -3.957703 | 3.170467  | 0.434485  |
| C  | -2.834277 | 3.450542  | -2.859228 |
| H  | -1.989512 | 3.890952  | -3.418818 |
| H  | -2.925396 | 2.384776  | -3.153507 |
| H  | -3.759947 | 3.959316  | -3.207931 |
| C  | -2.657040 | 5.125373  | -0.962235 |
| H  | -3.620428 | 5.606876  | -1.238555 |
| H  | -2.508646 | 5.274964  | 0.127171  |
| H  | -1.854355 | 5.664723  | -1.503619 |
| C  | 0.461059  | 4.063624  | -2.592707 |
| H  | 1.475350  | 4.439066  | -2.852672 |
| H  | 0.231179  | 3.236018  | -3.296350 |
| H  | -0.249209 | 4.892520  | -2.782798 |
| C  | 0.722228  | 4.805782  | -0.187320 |
| H  | -0.040032 | 5.602596  | -0.286070 |
| H  | 0.747236  | 4.482386  | 0.872332  |
| H  | 1.708530  | 5.253508  | -0.438823 |
| C  | 1.580591  | 2.564866  | -0.919299 |
| H  | 1.566896  | 2.151066  | 0.109672  |
| H  | 1.519643  | 1.724780  | -1.641673 |
| H  | 2.563127  | 3.060703  | -1.076477 |



|   |           |           |           |
|---|-----------|-----------|-----------|
| H | 0.302857  | 2.451408  | 1.808275  |
| C | -1.695402 | 3.631543  | 2.385643  |
| O | -1.941118 | 4.686083  | 2.846550  |
| P | -1.181069 | 2.752500  | -0.554501 |
| H | -2.932294 | 1.241099  | 1.645472  |
| O | -2.311774 | -2.988725 | 8.541634  |
| C | -3.331223 | -3.957273 | 8.363892  |
| H | -4.342562 | -3.493396 | 8.287525  |
| H | -3.161181 | -4.585134 | 7.457703  |
| H | -3.304557 | -4.608830 | 9.258645  |

64

A-pyr-CF3 SCF Done: -1855.12052564 A.U.

Number of imaginary frequencies = 0

|    |           |           |           |
|----|-----------|-----------|-----------|
| C  | -0.497379 | -0.335437 | -0.645385 |
| H  | -0.406190 | 1.006705  | -2.365303 |
| N  | -0.923268 | 0.222682  | 3.271752  |
| C  | -0.579110 | -1.146870 | 2.963187  |
| C  | -0.358543 | -1.358609 | 1.491749  |
| N  | -0.532831 | -0.246125 | 0.721816  |
| C  | -0.949045 | 0.886363  | -1.406113 |
| H  | -1.375496 | -1.865311 | 3.293720  |
| H  | 0.344414  | -1.473549 | 3.513583  |
| H  | -2.015631 | 0.720840  | -1.674751 |
| C  | -0.027998 | -2.594653 | 0.915781  |
| H  | 0.123474  | -3.478288 | 1.551950  |
| C  | 0.099111  | -2.680745 | -0.477529 |
| C  | -0.162734 | -1.540374 | -1.268591 |
| H  | -0.129780 | -1.603369 | -2.365563 |
| Ru | -0.776632 | 1.550893  | 1.779517  |
| C  | -1.247837 | 0.422501  | 4.678463  |
| H  | -0.492600 | -0.065951 | 5.345169  |
| H  | -1.209195 | 1.509474  | 4.893169  |
| C  | -2.635366 | -0.114749 | 5.021763  |
| C  | -3.765154 | 0.414211  | 4.360115  |
| C  | -2.820666 | -1.156436 | 5.951179  |
| C  | -5.050272 | -0.078680 | 4.631906  |
| C  | -4.108090 | -1.658417 | 6.223698  |
| C  | -5.225702 | -1.119867 | 5.565183  |
| H  | -3.616784 | 1.215220  | 3.616153  |
| H  | -1.943606 | -1.579304 | 6.470292  |
| H  | -5.923783 | 0.350043  | 4.114477  |
| H  | -4.236032 | -2.475567 | 6.951938  |
| H  | -6.234226 | -1.510186 | 5.776100  |
| C  | 0.640492  | 3.381939  | -1.008610 |
| C  | -2.532088 | 3.340190  | -0.851549 |
| C  | -3.665611 | 2.579824  | -0.123521 |
| H  | -3.721542 | 1.511456  | -0.422862 |
| H  | -3.533485 | 2.610026  | 0.976840  |
| H  | -4.642505 | 3.047629  | -0.375878 |
| C  | -2.825614 | 3.336355  | -2.366484 |
| H  | -2.081563 | 3.904782  | -2.953216 |
| H  | -2.884681 | 2.311042  | -2.786759 |
| H  | -3.815667 | 3.811110  | -2.544360 |

|   |           |           |           |
|---|-----------|-----------|-----------|
| C | -2.487229 | 4.788415  | -0.321481 |
| H | -3.489493 | 5.255470  | -0.438797 |
| H | -2.224247 | 4.827522  | 0.755246  |
| H | -1.766725 | 5.417329  | -0.882081 |
| C | 0.476425  | 3.956761  | -2.427150 |
| H | 1.451087  | 4.365791  | -2.773721 |
| H | 0.165520  | 3.187183  | -3.164720 |
| H | -0.254809 | 4.788405  | -2.461681 |
| C | 0.988129  | 4.509868  | -0.012772 |
| H | 0.199215  | 5.284362  | 0.045984  |
| H | 1.145622  | 4.108879  | 1.008224  |
| H | 1.926421  | 5.011161  | -0.336113 |
| C | 1.797380  | 2.354483  | -1.012928 |
| H | 1.893869  | 1.843531  | -0.032652 |
| H | 1.678985  | 1.580175  | -1.798718 |
| H | 2.753715  | 2.882958  | -1.217028 |
| H | 0.736552  | 1.969537  | 1.687577  |
| C | -1.089780 | 3.142254  | 2.664271  |
| O | -1.285954 | 4.183410  | 3.182320  |
| P | -0.905279 | 2.441738  | -0.336400 |
| C | 0.536896  | -3.967977 | -1.139976 |
| F | 0.308961  | -5.047705 | -0.352954 |
| F | -0.111362 | -4.167780 | -2.316751 |
| F | 1.867542  | -3.946381 | -1.420338 |

66

TS-EF-pyr-CF3 SCF Done: -1856.28194912 A.U.

Number of imaginary frequencies = 1

Imaginary frequency = -947.48 cm<sup>-1</sup>

|    |           |           |           |
|----|-----------|-----------|-----------|
| C  | -0.503552 | 0.028299  | -0.627246 |
| H  | -0.678461 | 1.164333  | -2.480677 |
| N  | -1.258675 | 0.596229  | 3.273088  |
| C  | -0.184901 | -0.354837 | 3.043269  |
| C  | -0.093005 | -0.729596 | 1.584811  |
| N  | -0.544433 | 0.217584  | 0.721475  |
| C  | -1.138698 | 1.102826  | -1.473469 |
| H  | -2.402953 | 0.807581  | 2.392232  |
| H  | -0.288492 | -1.277525 | 3.665210  |
| H  | 0.813768  | 0.095900  | 3.317312  |
| H  | -2.206715 | 0.827660  | -1.621497 |
| C  | 0.458586  | -1.927990 | 1.106422  |
| H  | 0.823912  | -2.689123 | 1.810040  |
| C  | 0.552154  | -2.123347 | -0.280464 |
| C  | 0.066261  | -1.137806 | -1.158612 |
| H  | 0.122958  | -1.280176 | -2.246961 |
| Ru | -1.244215 | 2.003169  | 1.608678  |
| C  | -1.315777 | 1.091042  | 4.638322  |
| H  | -0.375632 | 1.636575  | 4.916187  |
| H  | -2.130659 | 1.847159  | 4.686798  |
| C  | -1.589546 | 0.000831  | 5.671072  |
| C  | -2.567345 | -0.985697 | 5.417673  |
| C  | -0.886393 | -0.044767 | 6.891480  |
| C  | -2.840658 | -1.986532 | 6.364048  |
| C  | -1.160778 | -1.041716 | 7.845309  |
| H  | -3.103445 | -0.961646 | 4.454640  |

|   |           |           |           |
|---|-----------|-----------|-----------|
| H | -0.111021 | 0.713014  | 7.095532  |
| H | -3.607274 | -2.749112 | 6.150506  |
| H | -0.601677 | -1.060964 | 8.794797  |
| C | 0.453809  | 3.608884  | -1.121216 |
| C | -2.712831 | 3.625235  | -1.324846 |
| C | -3.954680 | 2.997164  | -0.652724 |
| H | -4.870009 | 3.457307  | -1.084872 |
| H | -4.021375 | 1.901466  | -0.819162 |
| H | -3.957293 | 3.163804  | 0.441533  |
| C | -2.838360 | 3.450416  | -2.853735 |
| H | -1.994787 | 3.892111  | -3.414009 |
| H | -2.930227 | 2.385256  | -3.149880 |
| H | -3.764684 | 3.959440  | -3.199827 |
| C | -2.660808 | 5.122804  | -0.954255 |
| H | -3.625323 | 5.602809  | -1.228675 |
| H | -2.511590 | 5.271670  | 0.135109  |
| H | -1.859883 | 5.664191  | -1.496077 |
| C | 0.456972  | 4.071170  | -2.590231 |
| H | 1.470232  | 4.448681  | -2.850500 |
| H | 0.227295  | 3.245715  | -3.296369 |
| H | -0.254641 | 4.899765  | -2.776174 |
| C | 0.721968  | 4.805963  | -0.182713 |
| H | -0.043258 | 5.600648  | -0.275149 |
| H | 0.753826  | 4.479598  | 0.875785  |
| H | 1.705449  | 5.257706  | -0.437377 |
| C | 1.581684  | 2.567921  | -0.924107 |
| H | 1.571475  | 2.149911  | 0.103212  |
| H | 1.521812  | 1.731550  | -1.650881 |
| H | 2.563268  | 3.065497  | -1.080545 |
| H | 0.308055  | 2.444339  | 1.808880  |
| C | -1.682952 | 3.624579  | 2.385330  |
| O | -1.923074 | 4.678620  | 2.847571  |
| P | -1.179738 | 2.753248  | -0.555478 |
| H | -2.926693 | 1.236894  | 1.650054  |
| C | -2.139191 | -2.016593 | 7.584162  |
| H | -2.352488 | -2.801366 | 8.327520  |
| C | 1.107222  | -3.419315 | -0.838182 |
| F | 1.753035  | -3.216983 | -2.014085 |
| F | 0.111037  | -4.311520 | -1.076296 |
| F | 1.977519  | -4.004319 | 0.018949  |

51

A-NCH3 SCF Done: -1286.78086265 A.U.

Number of imaginary frequencies = 0

|   |           |           |           |
|---|-----------|-----------|-----------|
| C | -0.813932 | -0.176787 | -0.804392 |
| H | -0.146786 | 1.109877  | -2.438917 |
| N | -2.246008 | 0.482353  | 2.847528  |
| C | -1.834253 | -0.895744 | 2.677105  |
| C | -1.319952 | -1.170771 | 1.289524  |
| N | -1.182174 | -0.064272 | 0.508131  |
| C | -0.909553 | 1.080389  | -1.634332 |
| H | -2.665231 | -1.618180 | 2.895668  |
| H | -1.019997 | -1.175461 | 3.403083  |
| H | -1.897784 | 1.057713  | -2.144830 |

|    |           |           |           |
|----|-----------|-----------|-----------|
| C  | -1.004665 | -2.447744 | 0.795339  |
| H  | -1.114496 | -3.325990 | 1.449448  |
| C  | -0.551710 | -2.574638 | -0.525216 |
| H  | -0.283987 | -3.562241 | -0.931567 |
| C  | -0.470833 | -1.426249 | -1.337968 |
| H  | -0.162910 | -1.499517 | -2.391733 |
| Ru | -1.505773 | 1.771786  | 1.491537  |
| C  | -2.668780 | 0.750622  | 4.209875  |
| H  | -1.841792 | 0.605872  | 4.953934  |
| H  | -3.028199 | 1.792631  | 4.303540  |
| C  | 0.889408  | 3.292729  | -0.759599 |
| C  | -2.161907 | 3.773006  | -1.486655 |
| C  | -3.562822 | 3.234019  | -1.113567 |
| H  | -3.716897 | 2.185720  | -1.447521 |
| H  | -3.731147 | 3.262849  | -0.018103 |
| H  | -4.340120 | 3.857505  | -1.607894 |
| C  | -2.025684 | 3.777537  | -3.023530 |
| H  | -1.064706 | 4.197431  | -3.371896 |
| H  | -2.138028 | 2.764819  | -3.463144 |
| H  | -2.834626 | 4.405790  | -3.457947 |
| C  | -2.021610 | 5.206506  | -0.933517 |
| H  | -2.859831 | 5.832532  | -1.310683 |
| H  | -2.060767 | 5.226660  | 0.174900  |
| H  | -1.079484 | 5.690927  | -1.260328 |
| C  | 1.218647  | 3.856606  | -2.153374 |
| H  | 2.303905  | 4.095650  | -2.208066 |
| H  | 1.003286  | 3.131934  | -2.966676 |
| H  | 0.668978  | 4.794562  | -2.367827 |
| C  | 1.131381  | 4.368742  | 0.321196  |
| H  | 0.496268  | 5.264390  | 0.179392  |
| H  | 0.930897  | 3.968944  | 1.335213  |
| H  | 2.192242  | 4.700143  | 0.282164  |
| C  | 1.818485  | 2.089554  | -0.471511 |
| H  | 1.559650  | 1.596328  | 0.488106  |
| H  | 1.789010  | 1.324773  | -1.274872 |
| H  | 2.868456  | 2.447966  | -0.399077 |
| H  | 0.013781  | 1.957325  | 1.855368  |
| C  | -1.812240 | 3.402383  | 2.299454  |
| O  | -1.984045 | 4.469282  | 2.773447  |
| P  | -0.915083 | 2.631544  | -0.557375 |
| H  | -3.503103 | 0.073162  | 4.522250  |

53

TS-EF-NCH3 SCF Done: -1287.94217617 A.U.

Number of imaginary frequencies = 1

Imaginary frequency = -923.53 cm<sup>-1</sup>

|   |           |           |           |
|---|-----------|-----------|-----------|
| C | -0.605645 | 0.053586  | -0.716372 |
| H | -0.850683 | 1.224219  | -2.541785 |
| N | -1.301938 | 0.525178  | 3.207375  |
| C | -0.203209 | -0.379340 | 2.937663  |
| C | -0.128130 | -0.732837 | 1.470582  |

|    |           |           |           |
|----|-----------|-----------|-----------|
| N  | -0.621943 | 0.217412  | 0.635077  |
| C  | -1.289946 | 1.126582  | -1.527796 |
| H  | -2.472629 | 0.719076  | 2.346206  |
| H  | -0.260277 | -1.316109 | 3.549844  |
| H  | 0.788454  | 0.098740  | 3.196440  |
| H  | -2.351902 | 0.823042  | -1.663265 |
| C  | 0.443540  | -1.908276 | 0.956509  |
| H  | 0.834853  | -2.670719 | 1.646295  |
| C  | 0.513721  | -2.079381 | -0.434988 |
| H  | 0.971545  | -2.985488 | -0.861659 |
| C  | -0.017915 | -1.090799 | -1.280887 |
| H  | 0.005732  | -1.206844 | -2.374608 |
| Ru | -1.362725 | 1.967676  | 1.575584  |
| C  | -1.339918 | 0.984788  | 4.579411  |
| H  | -0.434685 | 1.585132  | 4.859202  |
| H  | -2.227452 | 1.631289  | 4.735487  |
| C  | 0.231087  | 3.674089  | -1.157504 |
| C  | -2.936488 | 3.596454  | -1.301895 |
| C  | -4.146196 | 2.916767  | -0.621382 |
| H  | -5.083187 | 3.359955  | -1.024281 |
| H  | -4.184052 | 1.823795  | -0.813069 |
| H  | -4.130646 | 3.056554  | 0.476581  |
| C  | -3.085590 | 3.449657  | -2.831521 |
| H  | -2.267153 | 3.929857  | -3.397478 |
| H  | -3.147994 | 2.388210  | -3.148125 |
| H  | -4.034270 | 3.935147  | -3.150379 |
| C  | -2.924073 | 5.086715  | -0.900364 |
| H  | -3.907528 | 5.542940  | -1.147422 |
| H  | -2.759332 | 5.216465  | 0.189228  |
| H  | -2.149680 | 5.663734  | -1.444116 |
| C  | 0.192987  | 4.164035  | -2.616841 |
| H  | 1.189252  | 4.577493  | -2.888672 |
| H  | -0.025422 | 3.345373  | -3.334491 |
| H  | -0.546917 | 4.973783  | -2.773601 |
| C  | 0.481251  | 4.860749  | -0.201045 |
| H  | -0.306738 | 5.635665  | -0.267085 |
| H  | 0.537289  | 4.514854  | 0.850330  |
| H  | 1.448216  | 5.344246  | -0.461421 |
| C  | 1.393957  | 2.665280  | -1.000977 |
| H  | 1.414868  | 2.228842  | 0.018491  |
| H  | 1.344466  | 1.839762  | -1.740838 |
| H  | 2.356847  | 3.195676  | -1.166810 |
| H  | 0.179933  | 2.450956  | 1.754195  |
| C  | -1.842322 | 3.553134  | 2.396133  |
| O  | -2.111874 | 4.588760  | 2.885741  |
| P  | -1.363811 | 2.756252  | -0.575110 |
| H  | -3.018510 | 1.146370  | 1.624159  |
| H  | -1.411098 | 0.129028  | 5.297401  |

Number of imaginary frequencies = 0

|    |           |           |           |
|----|-----------|-----------|-----------|
| C  | -0.406373 | -0.351637 | -0.663938 |
| H  | -0.330072 | 1.002138  | -2.377528 |
| N  | -1.205144 | 0.098265  | 3.198415  |
| C  | -0.608259 | -1.195207 | 2.931743  |
| C  | -0.310933 | -1.388223 | 1.468823  |
| N  | -0.528240 | -0.287932 | 0.696992  |
| C  | -0.887357 | 0.856881  | -1.429812 |
| H  | -1.250989 | -2.049435 | 3.264036  |
| H  | 0.354468  | -1.327412 | 3.497718  |
| H  | -1.943867 | 0.659155  | -1.717123 |
| C  | 0.137449  | -2.591855 | 0.898328  |
| H  | 0.319755  | -3.464487 | 1.543785  |
| C  | 0.341183  | -2.654986 | -0.486973 |
| H  | 0.701609  | -3.583180 | -0.956737 |
| C  | 0.048663  | -1.525394 | -1.278377 |
| H  | 0.153949  | -1.558980 | -2.373065 |
| Ru | -0.946809 | 1.480705  | 1.761390  |
| C  | -1.633891 | 0.290967  | 4.573763  |
| H  | -1.139727 | -0.453552 | 5.247907  |
| H  | -1.309110 | 1.295763  | 4.924825  |
| C  | 0.665820  | 3.345718  | -0.897977 |
| C  | -2.507524 | 3.308416  | -0.965726 |
| C  | -3.692523 | 2.557663  | -0.313791 |
| H  | -3.728094 | 1.486031  | -0.604487 |
| H  | -3.641102 | 2.600084  | 0.792706  |
| H  | -4.647934 | 3.023928  | -0.640943 |
| C  | -2.698436 | 3.305203  | -2.496722 |
| H  | -1.904906 | 3.857011  | -3.032432 |
| H  | -2.747406 | 2.279123  | -2.916413 |
| H  | -3.664873 | 3.797877  | -2.743651 |
| C  | -2.489693 | 4.756165  | -0.432313 |
| H  | -3.479504 | 5.229310  | -0.614453 |
| H  | -2.298018 | 4.791204  | 0.659788  |
| H  | -1.729936 | 5.381747  | -0.942680 |
| C  | 0.606987  | 3.935214  | -2.318653 |
| H  | 1.603999  | 4.349110  | -2.588144 |
| H  | 0.353164  | 3.172947  | -3.085209 |
| H  | -0.121166 | 4.766529  | -2.399405 |
| C  | 0.945558  | 4.462295  | 0.131392  |
| H  | 0.159943  | 5.242405  | 0.136920  |
| H  | 1.020664  | 4.050396  | 1.157524  |
| H  | 1.909562  | 4.959102  | -0.114692 |
| C  | 1.816792  | 2.313855  | -0.828824 |
| H  | 1.840818  | 1.796169  | 0.152353  |
| H  | 1.749767  | 1.544970  | -1.625969 |
| H  | 2.787364  | 2.839542  | -0.961619 |
| H  | 0.567107  | 1.906897  | 1.821380  |
| C  | -1.328381 | 3.050949  | 2.650026  |
| O  | -1.554909 | 4.086002  | 3.170684  |
| P  | -0.924990 | 2.400955  | -0.342584 |

|   |           |           |          |
|---|-----------|-----------|----------|
| C | -3.179222 | 0.184068  | 4.810266 |
| C | -3.698185 | -1.182845 | 4.322379 |
| C | -3.917422 | 1.306349  | 4.056365 |
| H | -3.572649 | 2.309354  | 4.383744 |
| H | -3.735495 | 1.233514  | 2.963278 |
| H | -5.012927 | 1.242649  | 4.229151 |
| H | -3.523682 | -1.298539 | 3.231837 |
| H | -4.789844 | -1.281477 | 4.503529 |
| H | -3.193495 | -2.021568 | 4.849957 |
| C | -3.428950 | 0.329686  | 6.325214 |
| H | -3.048228 | 1.303046  | 6.702462 |
| H | -4.514055 | 0.279861  | 6.557355 |
| H | -2.923498 | -0.477610 | 6.898590 |

65

TS-EF-NCH2tBu SCF Done: -1445.26657258 A.U.

Number of imaginary frequencies = 1

Imaginary frequency = -945.51 cm<sup>-1</sup>

|    |           |           |           |
|----|-----------|-----------|-----------|
| C  | -0.386837 | 0.026875  | -0.752343 |
| H  | -0.867197 | 1.186288  | -2.537924 |
| N  | -0.787728 | 0.425585  | 3.233629  |
| C  | 0.345215  | -0.399664 | 2.853099  |
| C  | 0.324318  | -0.732042 | 1.380305  |
| N  | -0.303200 | 0.183043  | 0.597640  |
| C  | -1.214292 | 1.048750  | -1.493246 |
| H  | -2.034852 | 0.540974  | 2.452281  |
| H  | 0.413097  | -1.348854 | 3.437928  |
| H  | 1.319166  | 0.143338  | 3.034871  |
| H  | -2.257347 | 0.664903  | -1.547235 |
| C  | 0.936029  | -1.860093 | 0.808079  |
| H  | 1.436019  | -2.595433 | 1.455816  |
| C  | 0.904927  | -2.018707 | -0.586025 |
| H  | 1.391006  | -2.886731 | -1.058197 |
| C  | 0.234483  | -1.068143 | -1.375280 |
| H  | 0.175959  | -1.177341 | -2.468380 |
| Ru | -1.095775 | 1.864279  | 1.614191  |
| C  | -0.807945 | 0.818064  | 4.640340  |
| H  | 0.224142  | 0.750208  | 5.069207  |
| H  | -1.094744 | 1.887261  | 4.728332  |
| C  | 0.130375  | 3.704466  | -1.217665 |
| C  | -3.022287 | 3.381859  | -1.102056 |
| C  | -4.115573 | 2.608870  | -0.330119 |
| H  | -5.114202 | 2.974863  | -0.654870 |
| H  | -4.080502 | 1.516038  | -0.522758 |
| H  | -4.023937 | 2.751344  | 0.763703  |
| C  | -3.286947 | 3.227946  | -2.615418 |
| H  | -2.556575 | 3.769112  | -3.243474 |
| H  | -3.297215 | 2.165612  | -2.935006 |
| H  | -4.292230 | 3.642278  | -2.850075 |
| C  | -3.091407 | 4.867868  | -0.690281 |
| H  | -4.125413 | 5.245315  | -0.847461 |

|   |           |           |           |
|---|-----------|-----------|-----------|
| H | -2.843560 | 5.008891  | 0.382057  |
| H | -2.415136 | 5.505382  | -1.294154 |
| C | -0.065103 | 4.194169  | -2.664413 |
| H | 0.870238  | 4.685449  | -3.012446 |
| H | -0.276737 | 3.362850  | -3.369399 |
| H | -0.876297 | 4.943657  | -2.752822 |
| C | 0.363546  | 4.903998  | -0.273233 |
| H | -0.484869 | 5.615158  | -0.269781 |
| H | 0.529559  | 4.560158  | 0.767119  |
| H | 1.266315  | 5.462143  | -0.604860 |
| C | 1.377060  | 2.789452  | -1.165005 |
| H | 1.513009  | 2.351944  | -0.154854 |
| H | 1.332487  | 1.965577  | -1.906989 |
| H | 2.279359  | 3.394257  | -1.401583 |
| H | 0.413881  | 2.469711  | 1.674579  |
| C | -1.641091 | 3.398446  | 2.487476  |
| O | -1.961668 | 4.397809  | 3.020032  |
| P | -1.334731 | 2.661805  | -0.517731 |
| H | -2.668821 | 0.917062  | 1.773168  |
| C | -1.780925 | 0.004058  | 5.548022  |
| C | -3.232861 | 0.247384  | 5.085509  |
| H | -3.486689 | 1.328437  | 5.113709  |
| H | -3.384847 | -0.105527 | 4.044611  |
| H | -3.954853 | -0.292182 | 5.735217  |
| C | -1.609420 | 0.505095  | 6.996484  |
| H | -2.304513 | -0.019734 | 7.686048  |
| H | -0.574774 | 0.332887  | 7.364277  |
| H | -1.817519 | 1.594082  | 7.072301  |
| C | -1.468018 | -1.503303 | 5.477663  |
| H | -1.595557 | -1.880910 | 4.441497  |
| H | -0.426666 | -1.716604 | 5.803257  |
| H | -2.151355 | -2.083242 | 6.134478  |

54

A-NCH<sub>2</sub>CF<sub>3</sub> SCF Done: -1623.98744262 A.U.

Number of imaginary frequencies = 0

|   |           |           |           |
|---|-----------|-----------|-----------|
| C | -0.663946 | -0.240725 | -0.748999 |
| H | -0.201386 | 1.086198  | -2.421717 |
| N | -1.762040 | 0.328852  | 3.025555  |
| C | -1.404739 | -1.054220 | 2.786012  |
| C | -0.959332 | -1.276473 | 1.365448  |
| N | -0.932331 | -0.156978 | 0.590071  |
| C | -0.888204 | 1.016245  | -1.553909 |
| H | -2.253599 | -1.755194 | 2.987518  |
| H | -0.577592 | -1.393543 | 3.468250  |
| H | -1.915156 | 0.950518  | -1.976441 |
| C | -0.615011 | -2.531177 | 0.833224  |
| H | -0.630992 | -3.419533 | 1.482643  |
| C | -0.260539 | -2.623745 | -0.518996 |
| H | 0.023826  | -3.593163 | -0.956523 |
| C | -0.303094 | -1.466604 | -1.322832 |



|    |           |           |           |
|----|-----------|-----------|-----------|
| H  | -0.076974 | -1.516425 | -2.398391 |
| Ru | -1.223065 | 1.662828  | 1.613120  |
| C  | -2.316776 | 0.583070  | 4.329402  |
| H  | -1.971974 | -0.139903 | 5.109429  |
| H  | -2.053034 | 1.600946  | 4.684141  |
| C  | 0.867762  | 3.318599  | -0.834767 |
| C  | -2.266282 | 3.634387  | -1.245872 |
| C  | -3.587210 | 3.010548  | -0.736350 |
| H  | -3.707168 | 1.952450  | -1.052908 |
| H  | -3.650984 | 3.035669  | 0.370213  |
| H  | -4.446869 | 3.580854  | -1.151862 |
| C  | -2.286750 | 3.654738  | -2.788462 |
| H  | -1.389436 | 4.128012  | -3.226724 |
| H  | -2.389511 | 2.640238  | -3.226171 |
| H  | -3.167660 | 4.241090  | -3.131403 |
| C  | -2.153218 | 5.071345  | -0.695278 |
| H  | -3.061512 | 5.647077  | -0.978164 |
| H  | -2.079823 | 5.086262  | 0.411342  |
| H  | -1.280580 | 5.612912  | -1.112793 |
| C  | 1.027382  | 3.906598  | -2.248451 |
| H  | 2.087645  | 4.204200  | -2.406434 |
| H  | 0.772238  | 3.175590  | -3.044379 |
| H  | 0.410287  | 4.814526  | -2.398368 |
| C  | 1.154663  | 4.400879  | 0.228609  |
| H  | 0.458663  | 5.259114  | 0.160670  |
| H  | 1.079823  | 3.985263  | 1.253094  |
| H  | 2.185659  | 4.793036  | 0.088004  |
| C  | 1.884121  | 2.166488  | -0.651296 |
| H  | 1.746084  | 1.651623  | 0.321870  |
| H  | 1.819940  | 1.407280  | -1.457892 |
| H  | 2.915008  | 2.581997  | -0.674169 |
| H  | 0.313601  | 1.902526  | 1.823555  |
| C  | -1.507216 | 3.274813  | 2.466293  |
| O  | -1.662978 | 4.328995  | 2.971433  |
| P  | -0.868636 | 2.560434  | -0.466949 |
| C  | -3.846803 | 0.514518  | 4.335921  |
| F  | -4.338772 | 0.735574  | 5.584115  |
| F  | -4.402748 | 1.434025  | 3.509689  |
| F  | -4.297856 | -0.709653 | 3.933000  |

56

TS-EF-NCH2CF3 SCF Done: -1625.14786799 A.U.

Number of imaginary frequencies = 1

Imaginary frequency = -988.58 cm<sup>-1</sup>

|   |           |           |           |
|---|-----------|-----------|-----------|
| C | -0.557639 | 0.051883  | -0.745462 |
| H | -0.840388 | 1.235309  | -2.557630 |
| N | -1.219986 | 0.478302  | 3.195568  |
| C | -0.124023 | -0.436273 | 2.904229  |
| C | -0.054795 | -0.752268 | 1.428624  |
| N | -0.562532 | 0.202667  | 0.607856  |
| C | -1.265270 | 1.122440  | -1.539214 |

|    |           |           |           |
|----|-----------|-----------|-----------|
| H  | -2.375540 | 0.661670  | 2.365290  |
| H  | -0.186069 | -1.387866 | 3.480248  |
| H  | 0.863381  | 0.034365  | 3.180280  |
| H  | -2.324714 | 0.805812  | -1.663814 |
| C  | 0.523216  | -1.917173 | 0.897544  |
| H  | 0.923196  | -2.684576 | 1.576696  |
| C  | 0.586348  | -2.071673 | -0.495923 |
| H  | 1.049642  | -2.968636 | -0.935579 |
| C  | 0.037497  | -1.079874 | -1.326816 |
| H  | 0.052240  | -1.184646 | -2.421780 |
| Ru | -1.307066 | 1.939338  | 1.564415  |
| C  | -1.289205 | 0.949784  | 4.554584  |
| H  | -0.310808 | 1.338715  | 4.938658  |
| H  | -2.014177 | 1.785698  | 4.620279  |
| C  | 0.225798  | 3.688616  | -1.165616 |
| C  | -2.943395 | 3.567986  | -1.264263 |
| C  | -4.133786 | 2.867987  | -0.570347 |
| H  | -5.081847 | 3.298009  | -0.961061 |
| H  | -4.157699 | 1.774995  | -0.763567 |
| H  | -4.108096 | 3.005895  | 0.527487  |
| C  | -3.113032 | 3.427795  | -2.792632 |
| H  | -2.307823 | 3.918702  | -3.368201 |
| H  | -3.171277 | 2.367714  | -3.114340 |
| H  | -4.070671 | 3.906461  | -3.093961 |
| C  | -2.944792 | 5.056356  | -0.855124 |
| H  | -3.938086 | 5.499354  | -1.085829 |
| H  | -2.766958 | 5.184214  | 0.232458  |
| H  | -2.187018 | 5.647082  | -1.407401 |
| C  | 0.158102  | 4.192180  | -2.619392 |
| H  | 1.143910  | 4.623319  | -2.901070 |
| H  | -0.058120 | 3.377618  | -3.342269 |
| H  | -0.595995 | 4.992033  | -2.757067 |
| C  | 0.472978  | 4.869384  | -0.201174 |
| H  | -0.329228 | 5.631130  | -0.243953 |
| H  | 0.555537  | 4.513787  | 0.845084  |
| H  | 1.426279  | 5.372104  | -0.474614 |
| C  | 1.405058  | 2.695022  | -1.037216 |
| H  | 1.448362  | 2.249067  | -0.022633 |
| H  | 1.356166  | 1.876379  | -1.784663 |
| H  | 2.357323  | 3.241125  | -1.212410 |
| H  | 0.234997  | 2.437506  | 1.716979  |
| C  | -1.796431 | 3.522293  | 2.383460  |
| O  | -2.073416 | 4.554719  | 2.875412  |
| P  | -1.347761 | 2.742913  | -0.573579 |
| H  | -2.942000 | 1.094194  | 1.636187  |
| C  | -1.783216 | -0.093531 | 5.560751  |
| F  | -1.932243 | 0.466680  | 6.789769  |
| F  | -2.978805 | -0.617223 | 5.197893  |
| F  | -0.914776 | -1.139156 | 5.704176  |

A-NCH2PhOMe SCF Done: -1632.49896728 A.U.

Number of imaginary frequencies = 0

|    |           |           |           |
|----|-----------|-----------|-----------|
| C  | -1.204412 | -0.212188 | -0.919547 |
| H  | -1.529178 | 1.077746  | -2.652671 |
| N  | -1.182314 | 0.412474  | 3.006989  |
| C  | -0.654178 | -0.893537 | 2.673722  |
| C  | -0.628416 | -1.133315 | 1.189288  |
| N  | -1.058188 | -0.083521 | 0.434584  |
| C  | -1.915771 | 0.916473  | -1.625967 |
| H  | -1.248011 | -1.719001 | 3.147341  |
| H  | 0.388366  | -1.028620 | 3.072845  |
| H  | -2.977193 | 0.605287  | -1.743196 |
| C  | -0.226453 | -2.338213 | 0.588129  |
| H  | 0.129647  | -3.166657 | 1.219049  |
| C  | -0.290517 | -2.459221 | -0.806642 |
| H  | 0.030615  | -3.388259 | -1.302477 |
| C  | -0.803514 | -1.388562 | -1.566252 |
| H  | -0.914284 | -1.471491 | -2.657819 |
| Ru | -1.395279 | 1.708271  | 1.493510  |
| C  | -1.287262 | 0.620359  | 4.446279  |
| H  | -0.330388 | 0.360867  | 4.969233  |
| H  | -1.464188 | 1.700048  | 4.626435  |
| C  | -2.421302 | -0.192985 | 5.061616  |
| C  | -3.740389 | -0.029489 | 4.576219  |
| C  | -2.205571 | -1.135476 | 6.080077  |
| C  | -4.801672 | -0.770072 | 5.101109  |
| C  | -3.261796 | -1.895480 | 6.623671  |
| C  | -4.571199 | -1.712462 | 6.133095  |
| H  | -3.917451 | 0.690202  | 3.759459  |
| H  | -1.183727 | -1.286219 | 6.468420  |
| H  | -5.831744 | -0.643327 | 4.734077  |
| H  | -3.048081 | -2.622995 | 7.419431  |
| C  | -0.640870 | 3.612328  | -1.496540 |
| C  | -3.724206 | 3.159457  | -0.888893 |
| C  | -4.634377 | 2.281296  | 0.001768  |
| H  | -4.590274 | 1.206448  | -0.275635 |
| H  | -4.353065 | 2.360242  | 1.071380  |
| H  | -5.690258 | 2.611755  | -0.112900 |
| C  | -4.222214 | 3.070143  | -2.346513 |
| H  | -3.650059 | 3.713042  | -3.039585 |
| H  | -4.199472 | 2.033306  | -2.741487 |
| H  | -5.282496 | 3.404339  | -2.388799 |
| C  | -3.800659 | 4.616664  | -0.388005 |
| H  | -4.862969 | 4.944900  | -0.365276 |
| H  | -3.395685 | 4.722179  | 0.639206  |
| H  | -3.256983 | 5.317267  | -1.053375 |
| C  | -1.077561 | 4.114689  | -2.884377 |
| H  | -0.225445 | 4.637367  | -3.372834 |
| H  | -1.382442 | 3.287322  | -3.559362 |
| H  | -1.911962 | 4.841234  | -2.824796 |
| C  | -0.312151 | 4.807627  | -0.575937 |

|   |           |           |           |
|---|-----------|-----------|-----------|
| H | -1.183138 | 5.471329  | -0.413138 |
| H | 0.040478  | 4.463085  | 0.416548  |
| H | 0.493951  | 5.419102  | -1.037437 |
| C | 0.632396  | 2.747541  | -1.653008 |
| H | 0.931713  | 2.285880  | -0.689358 |
| H | 0.510411  | 1.938833  | -2.402924 |
| H | 1.470620  | 3.390800  | -1.998786 |
| H | 0.024743  | 2.307425  | 1.173595  |
| C | -1.777556 | 3.274157  | 2.391859  |
| O | -2.028525 | 4.299387  | 2.919878  |
| P | -1.935229 | 2.497343  | -0.592916 |
| O | -5.673619 | -2.389556 | 6.578376  |
| C | -5.507557 | -3.339670 | 7.616889  |
| H | -4.827157 | -4.172104 | 7.319619  |
| H | -5.111029 | -2.875609 | 8.550365  |
| H | -6.511785 | -3.756998 | 7.824553  |

67

TS-EF-NCH2PhOMe SCF Done: -1633.66074346 A.U.

Number of imaginary frequencies = 1

Imaginary frequency = -944.69 cm<sup>-1</sup>

|    |           |           |           |
|----|-----------|-----------|-----------|
| C  | -0.397646 | 0.218540  | -0.568775 |
| H  | -0.591099 | 1.399448  | -2.394001 |
| N  | -1.198673 | 0.672464  | 3.335517  |
| C  | -0.095325 | -0.240701 | 3.093113  |
| C  | 0.018446  | -0.580295 | 1.626692  |
| N  | -0.449890 | 0.375366  | 0.782539  |
| C  | -1.057634 | 1.297345  | -1.392697 |
| H  | -2.342720 | 0.870510  | 2.444796  |
| H  | -0.177676 | -1.178859 | 3.694677  |
| H  | 0.887211  | 0.233119  | 3.387066  |
| H  | -2.116224 | 0.997225  | -1.558501 |
| C  | 0.600196  | -1.754981 | 1.121601  |
| H  | 0.968722  | -2.522230 | 1.818498  |
| C  | 0.707986  | -1.918821 | -0.268196 |
| H  | 1.174353  | -2.824232 | -0.687050 |
| C  | 0.202286  | -0.924358 | -1.123227 |
| H  | 0.255181  | -1.034919 | -2.216497 |
| Ru | -1.211893 | 2.123263  | 1.711021  |
| C  | -1.290926 | 1.123409  | 4.715349  |
| H  | -0.374587 | 1.693965  | 5.022209  |
| H  | -2.134484 | 1.846547  | 4.772609  |
| C  | -1.529040 | -0.014735 | 5.700729  |
| C  | -2.557225 | -0.956934 | 5.461864  |
| C  | -0.743553 | -0.178772 | 6.853949  |
| C  | -2.795644 | -2.011815 | 6.346783  |
| C  | -0.969417 | -1.231540 | 7.763010  |
| C  | -2.003684 | -2.157247 | 7.510910  |
| H  | -3.167851 | -0.854842 | 4.549708  |
| H  | 0.073313  | 0.534895  | 7.055302  |
| H  | -3.595633 | -2.746513 | 6.167433  |

|   |           |           |           |
|---|-----------|-----------|-----------|
| H | -0.330923 | -1.320062 | 8.653357  |
| C | 0.457527  | 3.840190  | -0.969605 |
| C | -2.705113 | 3.769552  | -1.195524 |
| C | -3.933081 | 3.089595  | -0.548894 |
| H | -4.858641 | 3.535251  | -0.974782 |
| H | -3.967129 | 1.997253  | -0.744698 |
| H | -3.946009 | 3.226263  | 0.549488  |
| C | -2.815665 | 3.629532  | -2.729094 |
| H | -1.981606 | 4.109357  | -3.272091 |
| H | -2.873297 | 2.569595  | -3.051546 |
| H | -3.754406 | 4.119395  | -3.069834 |
| C | -2.699785 | 5.258061  | -0.787454 |
| H | -3.675997 | 5.717194  | -1.056757 |
| H | -2.561824 | 5.382839  | 0.306429  |
| H | -1.911130 | 5.835818  | -1.309483 |
| C | 0.458309  | 4.335723  | -2.427622 |
| H | 1.462051  | 4.748361  | -2.671704 |
| H | 0.257356  | 3.520046  | -3.153703 |
| H | -0.275874 | 5.147406  | -2.600591 |
| C | 0.683930  | 5.022825  | -0.002343 |
| H | -0.100039 | 5.799907  | -0.087298 |
| H | 0.710058  | 4.673076  | 1.048883  |
| H | 1.658851  | 5.504806  | -0.234173 |
| C | 1.614434  | 2.829098  | -0.786155 |
| H | 1.607698  | 2.389215  | 0.232009  |
| H | 1.583181  | 2.006064  | -1.529727 |
| H | 2.582089  | 3.358598  | -0.924779 |
| H | 0.326346  | 2.601462  | 1.931720  |
| C | -1.709924 | 3.705312  | 2.526766  |
| O | -1.989667 | 4.738706  | 3.015428  |
| P | -1.153111 | 2.922244  | -0.433819 |
| H | -2.871055 | 1.301887  | 1.711648  |
| O | -2.314752 | -3.219380 | 8.315491  |
| C | -1.561867 | -3.410798 | 9.501166  |
| H | -1.646227 | -2.542733 | 10.196277 |
| H | -1.980375 | -4.307539 | 9.997635  |
| H | -0.481583 | -3.589403 | 9.288468  |

61

A-NCH2PhF SCF Done: -1617.20787468 A.U.

Number of imaginary frequencies = 0

|   |           |           |           |
|---|-----------|-----------|-----------|
| C | -1.299110 | -0.230434 | -0.908367 |
| H | -1.401666 | 1.092656  | -2.643539 |
| N | -1.561887 | 0.357249  | 3.015195  |
| C | -1.103582 | -0.980481 | 2.708303  |
| C | -0.959675 | -1.204586 | 1.227622  |
| N | -1.261650 | -0.123711 | 0.455024  |
| C | -1.883115 | 0.943894  | -1.655862 |
| H | -1.799934 | -1.765055 | 3.107006  |
| H | -0.116363 | -1.199836 | 3.199260  |
| H | -2.946051 | 0.694125  | -1.867730 |

|    |           |           |           |
|----|-----------|-----------|-----------|
| C  | -0.576382 | -2.424570 | 0.645174  |
| H  | -0.323466 | -3.278743 | 1.291381  |
| C  | -0.527508 | -2.527600 | -0.751630 |
| H  | -0.218350 | -3.468645 | -1.232122 |
| C  | -0.912265 | -1.421713 | -1.536046 |
| H  | -0.934101 | -1.487532 | -2.634138 |
| Ru | -1.579765 | 1.676562  | 1.505742  |
| C  | -1.806283 | 0.555577  | 4.437093  |
| H  | -0.962274 | 0.161522  | 5.059543  |
| H  | -1.862322 | 1.645686  | 4.632112  |
| C  | -3.105184 | -0.107305 | 4.889923  |
| C  | -4.321258 | 0.262929  | 4.273780  |
| C  | -3.129795 | -1.108733 | 5.879685  |
| C  | -5.533485 | -0.337264 | 4.642423  |
| C  | -4.334954 | -1.728095 | 6.261945  |
| C  | -5.522170 | -1.330423 | 5.635602  |
| H  | -4.301624 | 1.029782  | 3.481405  |
| H  | -2.187607 | -1.412835 | 6.365979  |
| H  | -6.489481 | -0.053020 | 4.177478  |
| H  | -4.367696 | -2.513790 | 7.031504  |
| C  | -0.483069 | 3.566984  | -1.385964 |
| C  | -3.624637 | 3.273265  | -1.032690 |
| C  | -4.647281 | 2.436682  | -0.228076 |
| H  | -4.630641 | 1.361718  | -0.507940 |
| H  | -4.453041 | 2.498457  | 0.861734  |
| H  | -5.672881 | 2.817911  | -0.427828 |
| C  | -4.009413 | 3.223925  | -2.526126 |
| H  | -3.351725 | 3.842720  | -3.162902 |
| H  | -4.009056 | 2.191246  | -2.932418 |
| H  | -5.044172 | 3.613981  | -2.647144 |
| C  | -3.664121 | 4.728299  | -0.521081 |
| H  | -4.705776 | 5.113111  | -0.580390 |
| H  | -3.338930 | 4.804169  | 0.536653  |
| H  | -3.031423 | 5.403430  | -1.131756 |
| C  | -0.779376 | 4.107492  | -2.796539 |
| H  | 0.135783  | 4.589585  | -3.206213 |
| H  | -1.070723 | 3.305549  | -3.507260 |
| H  | -1.576706 | 4.877000  | -2.793156 |
| C  | -0.167532 | 4.733228  | -0.424185 |
| H  | -1.013524 | 5.439780  | -0.320225 |
| H  | 0.087673  | 4.360118  | 0.587559  |
| H  | 0.702802  | 5.306643  | -0.811814 |
| C  | 0.751148  | 2.636426  | -1.452764 |
| H  | 0.945111  | 2.146382  | -0.476160 |
| H  | 0.648843  | 1.845542  | -2.224291 |
| H  | 1.647993  | 3.237616  | -1.717435 |
| H  | -0.109252 | 2.199415  | 1.305985  |
| C  | -1.946874 | 3.253664  | 2.390451  |
| O  | -2.183650 | 4.286363  | 2.910355  |
| P  | -1.902853 | 2.514042  | -0.606716 |
| F  | -6.687150 | -1.918387 | 5.991364  |

63

TS-EF-NCH2PhF SCF Done: -1618.36962336 A.U.

Number of imaginary frequencies = 1

Imaginary frequency = -945.93 cm<sup>-1</sup>

|    |           |           |           |
|----|-----------|-----------|-----------|
| C  | -0.416421 | 0.215357  | -0.613793 |
| H  | -0.619072 | 1.423502  | -2.420034 |
| N  | -1.176798 | 0.618277  | 3.306077  |
| C  | -0.081971 | -0.299326 | 3.038212  |
| C  | 0.014542  | -0.618336 | 1.565501  |
| N  | -0.454072 | 0.353319  | 0.740102  |
| C  | -1.076159 | 1.310666  | -1.415561 |
| H  | -2.318475 | 0.836616  | 2.435275  |
| H  | -0.164167 | -1.246854 | 3.625235  |
| H  | 0.905270  | 0.164558  | 3.329907  |
| H  | -2.138662 | 1.020965  | -1.574718 |
| C  | 0.582110  | -1.790105 | 1.038465  |
| H  | 0.951755  | -2.570118 | 1.720452  |
| C  | 0.675276  | -1.934690 | -0.354636 |
| H  | 1.130703  | -2.837408 | -0.790875 |
| C  | 0.169067  | -0.924217 | -1.190198 |
| H  | 0.210513  | -1.019532 | -2.285375 |
| Ru | -1.192590 | 2.093958  | 1.699275  |
| C  | -1.247371 | 1.056697  | 4.688734  |
| H  | -0.316521 | 1.603734  | 4.994218  |
| H  | -2.072725 | 1.799185  | 4.763071  |
| C  | -1.509349 | -0.078690 | 5.674898  |
| C  | -2.473792 | -1.066336 | 5.377251  |
| C  | -0.811679 | -0.169674 | 6.896001  |
| C  | -2.745086 | -2.112170 | 6.272830  |
| C  | -1.071861 | -1.205620 | 7.810582  |
| C  | -2.038911 | -2.165339 | 7.484158  |
| H  | -3.006186 | -1.010765 | 4.413786  |
| H  | -0.045892 | 0.585821  | 7.138958  |
| H  | -3.494196 | -2.887703 | 6.052727  |
| H  | -0.533574 | -1.286218 | 8.766842  |
| C  | 0.463023  | 3.835801  | -0.971895 |
| C  | -2.702688 | 3.792597  | -1.165447 |
| C  | -3.929346 | 3.112709  | -0.516263 |
| H  | -4.855413 | 3.571864  | -0.926290 |
| H  | -3.974154 | 2.023716  | -0.727857 |
| H  | -3.930488 | 3.233263  | 0.584042  |
| C  | -2.829745 | 3.675382  | -2.699696 |
| H  | -1.997205 | 4.155852  | -3.244376 |
| H  | -2.900170 | 2.620784  | -3.036778 |
| H  | -3.767572 | 4.178145  | -3.023573 |
| C  | -2.681491 | 5.275178  | -0.736584 |
| H  | -3.656544 | 5.745444  | -0.990213 |
| H  | -2.532325 | 5.383978  | 0.357514  |
| H  | -1.893346 | 5.853998  | -1.258155 |
| C  | 0.452347  | 4.351710  | -2.422855 |

|   |           |           |           |
|---|-----------|-----------|-----------|
| H | 1.456770  | 4.759736  | -2.671571 |
| H | 0.237334  | 3.548052  | -3.158228 |
| H | -0.276911 | 5.171597  | -2.576657 |
| C | 0.708286  | 5.003230  | 0.009150  |
| H | -0.071179 | 5.786706  | -0.056225 |
| H | 0.744044  | 4.638970  | 1.055102  |
| H | 1.683803  | 5.481719  | -0.227084 |
| C | 1.613942  | 2.813458  | -0.814944 |
| H | 1.614860  | 2.359297  | 0.196934  |
| H | 1.568649  | 2.001400  | -1.569764 |
| H | 2.584041  | 3.337606  | -0.956437 |
| H | 0.351892  | 2.557799  | 1.910162  |
| C | -1.671583 | 3.669680  | 2.538411  |
| O | -1.939580 | 4.698449  | 3.042852  |
| P | -1.149220 | 2.922781  | -0.433650 |
| H | -2.854350 | 1.283376  | 1.707600  |
| F | -2.292960 | -3.170734 | 8.352520  |

54

A-NEt SCF Done: -1326.11246659 A.U.

Number of imaginary frequencies = 0

|    |           |           |           |
|----|-----------|-----------|-----------|
| C  | -0.723050 | -0.216261 | -0.773113 |
| H  | -0.213936 | 1.100116  | -2.440929 |
| N  | -1.883717 | 0.384452  | 2.986498  |
| C  | -1.499552 | -0.994119 | 2.758809  |
| C  | -1.059062 | -1.239085 | 1.340925  |
| N  | -1.001980 | -0.122685 | 0.563220  |
| C  | -0.913491 | 1.043412  | -1.582258 |
| H  | -2.323151 | -1.719912 | 2.986187  |
| H  | -0.658164 | -1.300228 | 3.440095  |
| H  | -1.936079 | 0.996552  | -2.017937 |
| C  | -0.740354 | -2.502779 | 0.815115  |
| H  | -0.781614 | -3.388507 | 1.467139  |
| C  | -0.374594 | -2.607507 | -0.533856 |
| H  | -0.107043 | -3.584008 | -0.966223 |
| C  | -0.383504 | -1.451280 | -1.340260 |
| H  | -0.148201 | -1.508383 | -2.413565 |
| Ru | -1.289098 | 1.696635  | 1.585532  |
| C  | -2.327821 | 0.633866  | 4.354576  |
| H  | -1.655264 | 0.115643  | 5.088163  |
| H  | -2.233084 | 1.718979  | 4.559654  |
| C  | 0.882862  | 3.301292  | -0.829482 |
| C  | -2.228352 | 3.696668  | -1.314113 |
| C  | -3.580219 | 3.113630  | -0.839817 |
| H  | -3.725172 | 2.061080  | -1.164367 |
| H  | -3.667339 | 3.135569  | 0.265156  |
| H  | -4.411115 | 3.712864  | -1.273223 |
| C  | -2.210073 | 3.714218  | -2.856844 |
| H  | -1.291107 | 4.164517  | -3.273663 |
| H  | -2.326128 | 2.701284  | -3.294948 |
| H  | -3.067692 | 4.320867  | -3.223225 |



|   |           |           |           |
|---|-----------|-----------|-----------|
| C | -2.088786 | 5.130799  | -0.762198 |
| H | -2.972292 | 5.732662  | -1.068779 |
| H | -2.042857 | 5.144253  | 0.346036  |
| H | -1.190148 | 5.646203  | -1.157063 |
| C | 1.088340  | 3.881711  | -2.240207 |
| H | 2.159242  | 4.151393  | -2.375806 |
| H | 0.831682  | 3.155661  | -3.040233 |
| H | 0.498621  | 4.805146  | -2.405181 |
| C | 1.176052  | 4.378189  | 0.237476  |
| H | 0.506605  | 5.255692  | 0.150942  |
| H | 1.064965  | 3.967414  | 1.260738  |
| H | 2.220961  | 4.740405  | 0.120359  |
| C | 1.865615  | 2.124151  | -0.623192 |
| H | 1.694513  | 1.616481  | 0.348477  |
| H | 1.797721  | 1.364512  | -1.429103 |
| H | 2.907190  | 2.513024  | -0.626752 |
| H | 0.248376  | 1.927670  | 1.827555  |
| C | -1.581842 | 3.315075  | 2.422539  |
| O | -1.746984 | 4.376237  | 2.912117  |
| P | -0.880932 | 2.586126  | -0.494031 |
| C | -3.782535 | 0.201770  | 4.612146  |
| H | -4.467905 | 0.748090  | 3.931267  |
| H | -3.929912 | -0.885983 | 4.440658  |
| H | -4.081490 | 0.416361  | 5.660481  |

56

TS-EF-NEt SCF Done: -1327.27419446 A.U.

Number of imaginary frequencies = 1

Imaginary frequency = -910.23 cm<sup>-1</sup>

|    |           |           |           |
|----|-----------|-----------|-----------|
| C  | -0.604818 | 0.047208  | -0.747063 |
| H  | -0.859329 | 1.234974  | -2.560154 |
| N  | -1.286918 | 0.479335  | 3.192138  |
| C  | -0.189490 | -0.425633 | 2.903149  |
| C  | -0.118091 | -0.758035 | 1.431227  |
| N  | -0.617273 | 0.197854  | 0.606084  |
| C  | -1.293720 | 1.127129  | -1.545093 |
| H  | -2.463663 | 0.686564  | 2.331476  |
| H  | -0.240416 | -1.378335 | 3.485447  |
| H  | 0.802091  | 0.048709  | 3.168872  |
| H  | -2.356279 | 0.824740  | -1.678314 |
| C  | 0.455579  | -1.926845 | 0.903466  |
| H  | 0.851043  | -2.694817 | 1.584743  |
| C  | 0.522177  | -2.084512 | -0.489612 |
| H  | 0.981550  | -2.985057 | -0.926262 |
| C  | -0.015529 | -1.089687 | -1.324488 |
| H  | 0.004911  | -1.195194 | -2.419335 |
| Ru | -1.352326 | 1.935893  | 1.566550  |
| C  | -1.322548 | 0.962800  | 4.565476  |
| H  | -0.377135 | 1.517492  | 4.813198  |
| H  | -2.139129 | 1.712506  | 4.631696  |
| C  | 0.230170  | 3.669905  | -1.155259 |

|   |           |           |           |
|---|-----------|-----------|-----------|
| C | -2.938094 | 3.595485  | -1.286153 |
| C | -4.145280 | 2.910200  | -0.606772 |
| H | -5.083696 | 3.357443  | -1.001784 |
| H | -4.184464 | 1.819018  | -0.808120 |
| H | -4.125218 | 3.040139  | 0.492311  |
| C | -3.094293 | 3.463313  | -2.816421 |
| H | -2.277387 | 3.947076  | -3.381532 |
| H | -3.160422 | 2.405017  | -3.142666 |
| H | -4.043359 | 3.953734  | -3.126453 |
| C | -2.922896 | 5.081919  | -0.870678 |
| H | -3.907145 | 5.540959  | -1.109213 |
| H | -2.753391 | 5.201479  | 0.219336  |
| H | -2.150567 | 5.663597  | -1.412396 |
| C | 0.185728  | 4.174509  | -2.609434 |
| H | 1.180963  | 4.590258  | -2.881519 |
| H | -0.036235 | 3.363211  | -3.334317 |
| H | -0.554472 | 4.986086  | -2.754768 |
| C | 0.485318  | 4.846759  | -0.188088 |
| H | -0.303224 | 5.622071  | -0.241643 |
| H | 0.547583  | 4.490162  | 0.859331  |
| H | 1.450674  | 5.333181  | -0.448956 |
| C | 1.393342  | 2.659158  | -1.014205 |
| H | 1.418575  | 2.212400  | 0.000687  |
| H | 1.340313  | 1.841220  | -1.762169 |
| H | 2.355653  | 3.190962  | -1.178868 |
| H | 0.192338  | 2.413591  | 1.742985  |
| C | -1.822990 | 3.517392  | 2.400208  |
| O | -2.086005 | 4.551238  | 2.897225  |
| P | -1.362659 | 2.746930  | -0.575383 |
| H | -3.008653 | 1.117960  | 1.614526  |
| C | -1.565361 | -0.133664 | 5.617042  |
| H | -2.491324 | -0.701324 | 5.384728  |
| H | -0.726031 | -0.859030 | 5.672879  |
| H | -1.675783 | 0.314383  | 6.626989  |

51

A-NCF3 SCF Done: -1584.67566566 A.U.

Number of imaginary frequencies = 0

|   |           |           |           |
|---|-----------|-----------|-----------|
| C | -0.852368 | -0.168248 | -0.817048 |
| H | -0.252086 | 1.112439  | -2.480615 |
| N | -2.294397 | 0.436306  | 2.836987  |
| C | -1.756176 | -0.913179 | 2.699370  |
| C | -1.284045 | -1.164283 | 1.293734  |
| N | -1.215839 | -0.064003 | 0.496881  |
| C | -0.982895 | 1.085166  | -1.646938 |
| H | -2.504896 | -1.692434 | 2.976015  |
| H | -0.883181 | -1.079714 | 3.382984  |
| H | -1.991779 | 1.068651  | -2.115338 |
| C | -0.920678 | -2.431336 | 0.803133  |
| H | -0.978606 | -3.307605 | 1.466076  |
| C | -0.486052 | -2.548456 | -0.523329 |

|    |           |           |           |
|----|-----------|-----------|-----------|
| H  | -0.183769 | -3.527607 | -0.926028 |
| C  | -0.461868 | -1.405872 | -1.346412 |
| H  | -0.158784 | -1.474479 | -2.401687 |
| Ru | -1.574677 | 1.780366  | 1.457926  |
| C  | 0.876800  | 3.238759  | -0.745605 |
| C  | -2.161444 | 3.810875  | -1.479980 |
| C  | -3.573289 | 3.312997  | -1.088713 |
| H  | -3.757899 | 2.264318  | -1.405717 |
| H  | -3.737328 | 3.368010  | 0.006727  |
| H  | -4.338383 | 3.947796  | -1.586922 |
| C  | -2.036261 | 3.802239  | -3.017779 |
| H  | -1.058559 | 4.175045  | -3.373771 |
| H  | -2.199876 | 2.794578  | -3.452331 |
| H  | -2.817456 | 4.466813  | -3.448223 |
| C  | -1.973481 | 5.242791  | -0.936744 |
| H  | -2.795800 | 5.889760  | -1.312840 |
| H  | -2.004582 | 5.273682  | 0.171351  |
| H  | -1.020397 | 5.697053  | -1.274500 |
| C  | 1.227888  | 3.798954  | -2.135988 |
| H  | 2.318731  | 4.011312  | -2.182211 |
| H  | 1.000659  | 3.082240  | -2.952962 |
| H  | 0.702600  | 4.750591  | -2.350705 |
| C  | 1.141975  | 4.303073  | 0.341676  |
| H  | 0.528640  | 5.214305  | 0.204786  |
| H  | 0.933858  | 3.904978  | 1.354540  |
| H  | 2.210155  | 4.609199  | 0.303905  |
| C  | 1.767522  | 2.006613  | -0.457809 |
| H  | 1.494229  | 1.518264  | 0.500059  |
| H  | 1.716772  | 1.244649  | -1.262746 |
| H  | 2.827305  | 2.333379  | -0.382486 |
| H  | -0.074243 | 1.910600  | 1.869555  |
| C  | -1.815058 | 3.425623  | 2.269197  |
| O  | -1.916048 | 4.501824  | 2.730988  |
| P  | -0.943011 | 2.633940  | -0.567019 |
| C  | -2.642496 | 0.756816  | 4.143292  |
| F  | -3.381739 | 1.890867  | 4.207687  |
| F  | -3.376544 | -0.238347 | 4.753127  |
| F  | -1.559338 | 0.954865  | 4.987678  |

53

TS-EF-NCF3 SCF Done: -1585.82950499 A.U.

Number of imaginary frequencies = 1

Imaginary frequency = -1131.09 cm<sup>-1</sup>

|   |           |           |           |
|---|-----------|-----------|-----------|
| C | -0.631241 | 0.034523  | -0.768544 |
| H | -0.771470 | 1.264701  | -2.566184 |
| N | -1.550717 | 0.373586  | 3.130743  |
| C | -0.460001 | -0.571936 | 2.886682  |
| C | -0.303207 | -0.840949 | 1.407609  |
| N | -0.722012 | 0.155026  | 0.585604  |
| C | -1.264440 | 1.135998  | -1.580932 |
| H | -2.550174 | 0.573926  | 2.315328  |

|    |           |           |           |
|----|-----------|-----------|-----------|
| H  | -0.612691 | -1.529229 | 3.433899  |
| H  | 0.503144  | -0.130191 | 3.249444  |
| H  | -2.318187 | 0.839975  | -1.781373 |
| C  | 0.275158  | -2.009537 | 0.887897  |
| H  | 0.601979  | -2.807356 | 1.571153  |
| C  | 0.434007  | -2.128894 | -0.501845 |
| H  | 0.902115  | -3.027104 | -0.933360 |
| C  | -0.028521 | -1.099330 | -1.338431 |
| H  | 0.057236  | -1.176126 | -2.432448 |
| Ru | -1.492187 | 1.897359  | 1.515772  |
| C  | 0.224506  | 3.680652  | -1.058077 |
| C  | -2.933484 | 3.594707  | -1.350466 |
| C  | -4.173878 | 2.899687  | -0.745161 |
| H  | -5.088658 | 3.349000  | -1.189800 |
| H  | -4.197344 | 1.810293  | -0.956854 |
| H  | -4.217184 | 3.017848  | 0.354126  |
| C  | -3.009504 | 3.482136  | -2.889108 |
| H  | -2.162455 | 3.967640  | -3.406154 |
| H  | -3.066853 | 2.428791  | -3.232338 |
| H  | -3.938496 | 3.983085  | -3.239452 |
| C  | -2.941104 | 5.076609  | -0.918068 |
| H  | -3.912914 | 5.535238  | -1.203034 |
| H  | -2.830356 | 5.186722  | 0.179972  |
| H  | -2.143782 | 5.665694  | -1.413373 |
| C  | 0.249393  | 4.213108  | -2.503109 |
| H  | 1.253964  | 4.641020  | -2.714234 |
| H  | 0.072790  | 3.414691  | -3.254257 |
| H  | -0.488546 | 5.022201  | -2.671104 |
| C  | 0.419899  | 4.839729  | -0.056359 |
| H  | -0.368629 | 5.612308  | -0.138036 |
| H  | 0.428218  | 4.463497  | 0.985826  |
| H  | 1.395141  | 5.334756  | -0.256123 |
| C  | 1.384907  | 2.673324  | -0.877811 |
| H  | 1.359876  | 2.208570  | 0.129061  |
| H  | 1.375284  | 1.870307  | -1.643684 |
| H  | 2.350809  | 3.213353  | -0.982378 |
| H  | 0.049993  | 2.374401  | 1.785238  |
| C  | -2.031581 | 3.479485  | 2.310515  |
| O  | -2.340326 | 4.512443  | 2.775370  |
| P  | -1.389603 | 2.735513  | -0.586773 |
| H  | -3.104229 | 1.081382  | 1.468103  |
| C  | -1.731920 | 0.746410  | 4.464075  |
| F  | -2.844661 | 1.502266  | 4.603330  |
| F  | -1.866796 | -0.343684 | 5.290304  |
| F  | -0.682225 | 1.460417  | 4.984823  |

60

A-NtBu SCF Done: -1404.77509875 A.U.

Number of imaginary frequencies = 0

|   |           |           |           |
|---|-----------|-----------|-----------|
| C | -0.224705 | -5.097090 | -0.749954 |
| H | 0.159706  | -5.045892 | -2.900480 |

|    |           |           |           |
|----|-----------|-----------|-----------|
| N  | -0.897844 | -2.338863 | 2.062142  |
| C  | -0.570100 | -3.637341 | 2.629858  |
| C  | -0.353917 | -4.692525 | 1.582760  |
| N  | -0.320029 | -4.232259 | 0.305582  |
| C  | -0.392887 | -4.486295 | -2.118688 |
| H  | -1.359554 | -4.028868 | 3.317610  |
| H  | 0.362026  | -3.603381 | 3.258572  |
| H  | -1.471374 | -4.559948 | -2.381741 |
| C  | -0.210594 | -6.064310 | 1.859691  |
| H  | -0.229974 | -6.412936 | 2.903456  |
| C  | -0.042728 | -6.959670 | 0.795518  |
| H  | 0.084306  | -8.036571 | 0.986207  |
| C  | -0.065912 | -6.470281 | -0.526873 |
| H  | 0.021721  | -7.153124 | -1.385057 |
| Ru | -0.273029 | -2.132855 | 0.131715  |
| C  | 1.805682  | -2.593449 | -2.796672 |
| C  | -1.243516 | -1.929655 | -3.372700 |
| C  | -2.592418 | -1.850584 | -2.619663 |
| H  | -2.942772 | -2.845646 | -2.271592 |
| H  | -2.523523 | -1.191774 | -1.730465 |
| H  | -3.371204 | -1.443537 | -3.301577 |
| C  | -1.432313 | -2.786293 | -4.642274 |
| H  | -0.514593 | -2.862132 | -5.253479 |
| H  | -1.779349 | -3.814932 | -4.413017 |
| H  | -2.214497 | -2.320131 | -5.281493 |
| C  | -0.807106 | -0.499815 | -3.755144 |
| H  | -1.618711 | -0.010148 | -4.336788 |
| H  | -0.610202 | 0.127002  | -2.861726 |
| H  | 0.099334  | -0.495567 | -4.393247 |
| C  | 1.921187  | -2.945750 | -4.290626 |
| H  | 2.995605  | -3.006286 | -4.573135 |
| H  | 1.465426  | -3.929200 | -4.531880 |
| H  | 1.457714  | -2.177792 | -4.941134 |
| C  | 2.389178  | -1.188425 | -2.532567 |
| H  | 1.853167  | -0.392871 | -3.084976 |
| H  | 2.350219  | -0.935370 | -1.454541 |
| H  | 3.452874  | -1.163799 | -2.856056 |
| C  | 2.614192  | -3.623685 | -1.972646 |
| H  | 2.489770  | -3.460129 | -0.882331 |
| H  | 2.330659  | -4.671562 | -2.201675 |
| H  | 3.694306  | -3.516269 | -2.213134 |
| H  | 1.296131  | -2.113237 | 0.226080  |
| C  | -0.147742 | -0.316171 | -0.148855 |
| O  | -0.009586 | 0.827473  | -0.414045 |
| P  | 0.008741  | -2.643584 | -2.093019 |
| C  | -1.059582 | -1.255430 | 3.075808  |
| C  | 0.312953  | -0.605841 | 3.383021  |
| C  | -1.671461 | -1.779767 | 4.401953  |
| H  | -2.625400 | -2.318303 | 4.218514  |
| H  | -0.986078 | -2.451776 | 4.958139  |
| H  | -1.893983 | -0.923831 | 5.071056  |

|   |           |           |          |
|---|-----------|-----------|----------|
| H | 1.033260  | -1.368072 | 3.749633 |
| H | 0.225687  | 0.182584  | 4.160715 |
| H | 0.735135  | -0.155695 | 2.463235 |
| C | -2.033189 | -0.193408 | 2.521275 |
| H | -1.646508 | 0.262913  | 1.591766 |
| H | -3.013679 | -0.659051 | 2.290950 |
| H | -2.189326 | 0.620178  | 3.260523 |

62

TS-EF-NtBu SCF Done: -1405.93767813 A.U.

Number of imaginary frequencies = 1

Imaginary frequency = -893.84 cm<sup>-1</sup>

|    |           |           |           |
|----|-----------|-----------|-----------|
| C  | -0.828807 | 0.029756  | -0.890952 |
| H  | -0.812730 | 1.345944  | -2.631461 |
| N  | -1.878573 | 0.237559  | 2.996245  |
| C  | -0.801686 | -0.704045 | 2.737227  |
| C  | -0.615119 | -0.944469 | 1.259582  |
| N  | -0.958766 | 0.096754  | 0.462576  |
| C  | -1.348893 | 1.212707  | -1.669473 |
| H  | -2.922846 | 0.616461  | 2.004294  |
| H  | -0.956659 | -1.692315 | 3.231823  |
| H  | 0.193918  | -0.324210 | 3.110667  |
| H  | -2.415601 | 1.015824  | -1.917266 |
| C  | -0.083021 | -2.122039 | 0.706260  |
| H  | 0.187281  | -2.960039 | 1.365812  |
| C  | 0.102375  | -2.198956 | -0.682384 |
| H  | 0.530878  | -3.105653 | -1.137390 |
| C  | -0.277082 | -1.113619 | -1.491389 |
| H  | -0.161437 | -1.152097 | -2.584700 |
| Ru | -1.647216 | 1.830042  | 1.477284  |
| C  | 0.342036  | 3.572106  | -0.949769 |
| C  | -2.790929 | 3.800190  | -1.380844 |
| C  | -4.115005 | 3.196854  | -0.859694 |
| H  | -4.966454 | 3.748343  | -1.315246 |
| H  | -4.229063 | 2.125133  | -1.126162 |
| H  | -4.193790 | 3.270642  | 0.241828  |
| C  | -2.810510 | 3.769839  | -2.924535 |
| H  | -1.897344 | 4.192933  | -3.380518 |
| H  | -2.953138 | 2.744710  | -3.323884 |
| H  | -3.669747 | 4.376484  | -3.286425 |
| C  | -2.683074 | 5.253848  | -0.872584 |
| H  | -3.595899 | 5.814730  | -1.170116 |
| H  | -2.608455 | 5.299531  | 0.233237  |
| H  | -1.815010 | 5.789212  | -1.306208 |
| C  | 0.487956  | 4.167720  | -2.362392 |
| H  | 1.536492  | 4.509721  | -2.506977 |
| H  | 0.275909  | 3.425619  | -3.160624 |
| H  | -0.164573 | 5.048891  | -2.521271 |
| C  | 0.596079  | 4.658612  | 0.118186  |
| H  | -0.113360 | 5.505152  | 0.043936  |
| H  | 0.520194  | 4.233874  | 1.138895  |

|   |           |           |           |
|---|-----------|-----------|-----------|
| H | 1.621182  | 5.068823  | -0.013462 |
| C | 1.395654  | 2.453210  | -0.769422 |
| H | 1.280714  | 1.945537  | 0.210033  |
| H | 1.349372  | 1.690093  | -1.573621 |
| H | 2.410968  | 2.904600  | -0.804851 |
| H | -0.097282 | 2.159751  | 1.839554  |
| C | -2.061685 | 3.418205  | 2.319673  |
| O | -2.278686 | 4.468082  | 2.809149  |
| P | -1.372897 | 2.763011  | -0.593657 |
| H | -3.351110 | 1.149862  | 1.283859  |
| C | -2.155490 | 0.516961  | 4.427167  |
| C | -1.037651 | 1.369167  | 5.074245  |
| C | -2.302720 | -0.811433 | 5.216508  |
| H | -3.029733 | -1.484512 | 4.714788  |
| H | -1.338834 | -1.351056 | 5.322425  |
| H | -2.671292 | -0.607324 | 6.242677  |
| H | -0.052568 | 0.861195  | 5.005071  |
| H | -1.243095 | 1.551254  | 6.150111  |
| H | -0.948806 | 2.345684  | 4.558849  |
| C | -3.501503 | 1.264588  | 4.528576  |
| H | -4.317843 | 0.659924  | 4.080649  |
| H | -3.755443 | 1.461179  | 5.590258  |
| H | -3.468239 | 2.237291  | 4.002053  |

55

A-NCH2OCH3 SCF Done: -1401.35640193 A.U.

Number of imaginary frequencies = 0

|    |           |           |           |
|----|-----------|-----------|-----------|
| C  | -0.475962 | -0.336539 | -0.664578 |
| H  | -0.287496 | 1.010774  | -2.374453 |
| N  | -1.375090 | 0.147927  | 3.176898  |
| C  | -0.814942 | -1.168688 | 2.924233  |
| C  | -0.488782 | -1.370242 | 1.471736  |
| N  | -0.642792 | -0.264687 | 0.691162  |
| C  | -0.891974 | 0.880912  | -1.453690 |
| H  | -1.505222 | -1.981576 | 3.257111  |
| H  | 0.127074  | -1.329334 | 3.518556  |
| H  | -1.937646 | 0.706637  | -1.791037 |
| C  | -0.068091 | -2.591364 | 0.915754  |
| H  | 0.057228  | -3.468898 | 1.567867  |
| C  | 0.184599  | -2.663393 | -0.460281 |
| H  | 0.529899  | -3.604206 | -0.916228 |
| C  | -0.037718 | -1.525604 | -1.261846 |
| H  | 0.106167  | -1.564277 | -2.351940 |
| Ru | -1.077032 | 1.520533  | 1.728733  |
| C  | -1.641310 | 0.365648  | 4.564744  |
| H  | -0.718537 | 0.203402  | 5.201559  |
| H  | -1.978479 | 1.417146  | 4.718972  |
| C  | 0.688131  | 3.338068  | -0.854443 |
| C  | -2.478166 | 3.367025  | -1.075410 |
| C  | -3.707864 | 2.640049  | -0.482016 |
| H  | -3.758517 | 1.572967  | -0.786716 |
| H  | -3.703469 | 2.670016  | 0.626139  |
| H  | -4.636404 | 3.133307  | -0.844821 |

|   |           |           |           |
|---|-----------|-----------|-----------|
| C | -2.594839 | 3.364987  | -2.614051 |
| H | -1.770593 | 3.907206  | -3.111872 |
| H | -2.636696 | 2.339597  | -3.036085 |
| H | -3.542493 | 3.869258  | -2.906056 |
| C | -2.456974 | 4.815617  | -0.544328 |
| H | -3.425476 | 5.309050  | -0.779214 |
| H | -2.322052 | 4.850805  | 0.556046  |
| H | -1.658254 | 5.422884  | -1.015852 |
| C | 0.705455  | 3.923577  | -2.277916 |
| H | 1.721964  | 4.315595  | -2.503304 |
| H | 0.470133  | 3.163876  | -3.052788 |
| H | -0.001012 | 4.769431  | -2.393053 |
| C | 0.942473  | 4.453100  | 0.183225  |
| H | 0.169663  | 5.245374  | 0.154820  |
| H | 0.969105  | 4.043271  | 1.212568  |
| H | 1.923594  | 4.933841  | -0.024003 |
| C | 1.814399  | 2.284458  | -0.730247 |
| H | 1.787938  | 1.773075  | 0.254054  |
| H | 1.766076  | 1.511350  | -1.524615 |
| H | 2.799701  | 2.790612  | -0.825256 |
| H | 0.431005  | 1.940332  | 1.842960  |
| C | -1.499015 | 3.099669  | 2.586278  |
| O | -1.753525 | 4.136955  | 3.087256  |
| P | -0.946722 | 2.428879  | -0.374808 |
| O | -2.650389 | -0.552783 | 5.009476  |
| C | -2.872152 | -0.486844 | 6.399218  |
| H | -3.653857 | -1.230925 | 6.654203  |
| H | -1.950793 | -0.724544 | 6.992124  |
| H | -3.228628 | 0.522498  | 6.728764  |

57

TS-EF-NCH2OCH3 SCF Done: -1402.51843932 A.U.

Number of imaginary frequencies = 1

Imaginary frequency = -944.69 cm<sup>-1</sup>

|    |           |           |           |
|----|-----------|-----------|-----------|
| C  | -0.435905 | 0.014817  | -0.739177 |
| H  | -0.859123 | 1.186486  | -2.531540 |
| N  | -0.928394 | 0.407257  | 3.219993  |
| C  | 0.200254  | -0.445428 | 2.880079  |
| C  | 0.212105  | -0.765962 | 1.405602  |
| N  | -0.383998 | 0.162899  | 0.613197  |
| C  | -1.230845 | 1.051371  | -1.495099 |
| H  | -2.154040 | 0.530149  | 2.440217  |
| H  | 0.211693  | -1.383997 | 3.480254  |
| H  | 1.172537  | 0.084539  | 3.101717  |
| H  | -2.278540 | 0.684591  | -1.572389 |
| C  | 0.821884  | -1.899012 | 0.841761  |
| H  | 1.293365  | -2.645069 | 1.498398  |
| C  | 0.823712  | -2.048979 | -0.553524 |
| H  | 1.309414  | -2.920913 | -1.018793 |
| C  | 0.186113  | -1.084822 | -1.353274 |
| H  | 0.153275  | -1.186888 | -2.448134 |
| Ru | -1.175497 | 1.859906  | 1.613205  |
| C  | -0.913401 | 0.875222  | 4.566014  |
| H  | 0.044143  | 1.429803  | 4.805051  |
| H  | -1.760382 | 1.590344  | 4.713435  |



|   |           |           |           |
|---|-----------|-----------|-----------|
| C | 0.154838  | 3.682150  | -1.176324 |
| C | -3.005620 | 3.416790  | -1.139447 |
| C | -4.131090 | 2.663257  | -0.394968 |
| H | -5.114535 | 3.045472  | -0.746100 |
| H | -4.109636 | 1.569608  | -0.584592 |
| H | -4.066094 | 2.806709  | 0.700534  |
| C | -3.236639 | 3.269016  | -2.659010 |
| H | -2.480666 | 3.795440  | -3.269023 |
| H | -3.261358 | 2.207305  | -2.979733 |
| H | -4.227257 | 3.704132  | -2.916927 |
| C | -3.057262 | 4.903505  | -0.727409 |
| H | -4.079936 | 5.299703  | -0.910298 |
| H | -2.834576 | 5.039220  | 0.350998  |
| H | -2.354640 | 5.529218  | -1.313226 |
| C | 0.001612  | 4.181714  | -2.624897 |
| H | 0.953040  | 4.658637  | -2.948180 |
| H | -0.207144 | 3.357463  | -3.338949 |
| H | -0.794524 | 4.945101  | -2.728479 |
| C | 0.387746  | 4.873251  | -0.221097 |
| H | -0.450811 | 5.595943  | -0.227402 |
| H | 0.532173  | 4.522015  | 0.819991  |
| H | 1.303437  | 5.420659  | -0.534598 |
| C | 1.383850  | 2.745098  | -1.100221 |
| H | 1.491308  | 2.301411  | -0.089423 |
| H | 1.341297  | 1.924872  | -1.846300 |
| H | 2.301167  | 3.335282  | -1.314867 |
| H | 0.342633  | 2.436147  | 1.706766  |
| C | -1.709662 | 3.410293  | 2.465165  |
| O | -2.018216 | 4.426594  | 2.971961  |
| P | -1.346148 | 2.663778  | -0.519007 |
| H | -2.765606 | 0.929207  | 1.747805  |
| O | -1.033896 | -0.236731 | 5.461477  |
| C | -0.868596 | 0.129593  | 6.811825  |
| H | -0.966937 | -0.787586 | 7.427343  |
| H | 0.135838  | 0.584063  | 7.013501  |
| H | -1.641110 | 0.865065  | 7.154086  |
